# Supplementary material
Source: PubMed Central journal article supplement (PMC3085905)

Supporting Information

**Gold-Catalyzed Nitrene Transfer to Activated Alkynes: Formation of  $\alpha$ ,  $\beta$ -  
Unsaturated Amidines**

Chaoqun Li and Liming Zhang

Department of Chemistry and Biochemistry, University of California, Santa Barbara,  
California, 93106

| Content                                                                               | Page Number |
|---------------------------------------------------------------------------------------|-------------|
| General                                                                               | 2           |
| General procedure : preparation of oxidants                                           | 2           |
| General procedure : preparation of alkynes                                            | 3           |
| General procedure : Gold-catalyzed synthesis $\alpha$ , $\beta$ -unsaturated amidines | 3           |
| ORTEP drawing of <i>E-14j</i>                                                         | 21          |
| $^1\text{H}$ and $^{13}\text{C}$ NMR spectra                                          | 22          |

**General** Ethyl acetate (ACS grade), hexanes (ACS grade), diethyl ether (ACS grade) and anhydrous 1, 2-dichloroethane (HPLC grade) were purchased from Fisher Scientific and used without further purification. Methylene chloride and tetrahydrofuran were purified using MBraun Solvent Purifier. Commercially available reagents were used without further purification. Reactions were monitored by thin layer chromatography (TLC) using Sorbent Technologies' pre-coated silica gel plates. Flash column chromatography was performed over Sorbent Technologies' silica gel (230-400 mesh). <sup>1</sup>H NMR and <sup>13</sup>C NMR spectra were recorded on a Varian 500 MHz Unity plus spectrometer and a Varian 400 MHz spectrometer using residue solvent peaks as internal standards. Infrared spectra were recorded with a Perkin Elmer FT-IR spectrum 2000 spectrometer and are reported in reciprocal centimeter (cm<sup>-1</sup>). Mass spectra were recorded with Micromass QTOF2 Quadrupole/Time-of-Flight Tandem mass spectrometer using electron spray ionization.

### **General procedure A : preparation of oxidants**

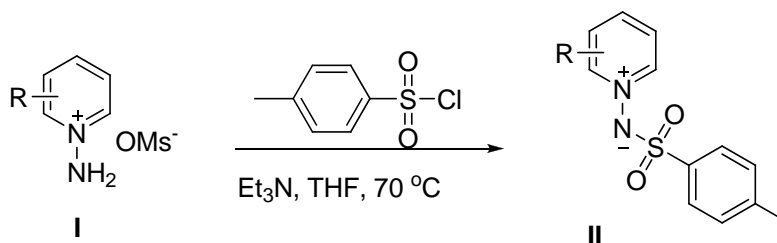

Compound **I** were prepared according to the literature procedure.<sup>1</sup> Iminopyridinium ylide **II** were prepared from **I** according to the following procedure: to an ice-cold solution of **I** (2 mmol) and Et<sub>3</sub>N (4 mmol) in anhydrous tetrahydrofuran (15 ml) was added 4-methylbenzenesulfonyl chloride (3 mmol). The reaction was allowed to reflux for 24 h at 70 °C. After cooling to room temperature, the reaction mixture was concentrated under *vacuum*. The residue was purified via silica gel flash chromatography to afford the desired product.

<sup>1</sup> Yoon, K.; Kode, B.; Bowen, L.; Redda, K. K. *J. Heterocyclic Chem.* **2001**, 38, 69-76.

### **General procedure B: preparation of alkynes**

The *N*-alkynyloxazolidinones were prepared according to the literature procedure<sup>2</sup> as follows: to a mixture of a 2-oxazolidinone (2.0 equiv), K<sub>3</sub>PO<sub>4</sub> (2.0 equiv), CuSO<sub>4</sub>·5H<sub>2</sub>O (0.1 equiv), and 1,10-phenanthroline (0.2 equiv) in a round flask was added a solution of 1-bromoalkyne (1.0 equiv, 1 M) in DMF/toluene (1/10). The reaction mixture was heated to 100 °C for 24 h while being monitored with TLC analysis. Upon completion, the reaction mixture was cooled to room temperature, diluted with EtOAc, and filtered through Celite, and the filtrate was concentrated under *vacuum*. The crude products were purified by silica gel flash column chromatography to afford the desired alkyne products.

### **General procedure C: Gold-catalyzed synthesis $\alpha$ , $\beta$ -unsaturated amidines**

An oven-dried vial was charged with an alkyne (0.2 mmol) and (3,5-dichloropyridinium-1-yl)tosylamide (0.24 mmol, 1.2 equiv). DCE (4 ml) and IPrAuNTf<sub>2</sub> (8.6 mg, 5 mol %) were added. The reaction mixture was stirred at the indicated temperature until the substrate was completely consumed. The reaction mixture was concentrated under *vacuum*. The residue was purified via silica gel flash chromatography to give the amidine product.

### **Dibenzothiophene, 5,5-dihydro-5-[[4-methylphenyl)sulfonyl]imino]<sup>3</sup>**

---

<sup>2</sup> Zhang, X.; Zhang, Y.; Huang, J.; Hsung, R. P.; Kurtz, K. C. M.; Oppenheimer, J.; Petersen, M.; E.; Sagamanova, I. K.; Shen, L.; Tracey, M. R. *J. Org. Chem.* **2006**, *71*, 4170.

<sup>3</sup> Morita, H.; Tatami, A.; Maeda, T.; Kim, B. J.; Kawashima, W.; Yoshimura, T.; Abe, H.; Akasaka, T. *J. Org. Chem.* **2008**, *73*, 7159.

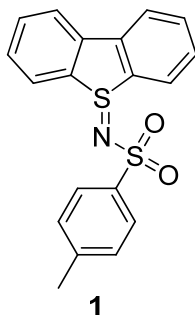

Compound **1** was prepared in 60 % yield according to the following procedure (eluent: ethyl acetate: hexanes = 10: 1): an oven-dried round flask was charged with a toluenesulfonamide (1.0 mmol), diacetoxyiodobenzene (1.3 mmol, 1.3 equiv), dibenzothiophene (1.3 mmol, 1.3 equiv), MgO (4.0 mmol, 4.0 equiv), DCM (10 ml) and Rh<sub>2</sub>(OAc)<sub>4</sub> (8.82 mg, 2 mol %) was added. The reaction mixture was stirred at the room temperature while being monitored with TLC analysis. After 20 h, the reaction mixture was concentrated under *vacuum*. The residue was purified via silica gel flash chromatography to give desired the product. <sup>1</sup>H NMR (400 MHz, CDCl<sub>3</sub>) δ 7.86 (d, 2H, *J* = 8.0 Hz), 7.82 (d, 2H, *J* = 8.0 Hz), 7.61 -7.66 (m, 4H), 7.42 -7.47 (m, 2H), 7.25 (d, 2H, *J* = 8.0 Hz), 2.43 (s, 3H, ); <sup>13</sup>C NMR (125 MHz, CDCl<sub>3</sub>) δ 142.0, 141.3, 137.4, 137.2, 132.9, 130.0, 129.3, 127.5, 126.6, 122.4, 21.6; IR (neat): 3448, 1446, 1298, 1284, 1085, 939; MS (ES<sup>+</sup>) Calculated for [C<sub>19</sub>H<sub>15</sub>NO<sub>2</sub>S<sub>2</sub>Na]<sup>+</sup>: 376.04; Found: 376.04

**Dibenzothiophene, 5,5-dihydro-5-[(methanesulfonyl)imino]<sup>4</sup>**

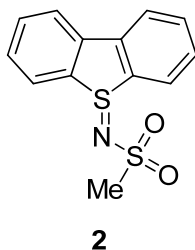

Compound **2** was prepared in 58 % yield according to the same procedure to compound **1**. (eluent: ethyl acetate: hexanes = 1: 1). <sup>1</sup>H NMR (400 MHz, CDCl<sub>3</sub>) δ 8.01 (d, 2H, *J* =

<sup>4</sup> Desikan, V.; Liu, Y.; Toscano, J. P.; Jenks, W. S. *J. Org. Chem.* **2008**, *73*, 4398.

8.0 Hz), 7.92 (d, 2H,  $J = 8.0$  Hz), 7.70 (td, 2H,  $J = 7.2, 1.2$  Hz), 7.59 (td, 2H,  $J = 7.6, 1.2$  Hz), 3.07 (s, 3H);  $^{13}\text{C}$  NMR (125 MHz,  $\text{CDCl}_3$ )  $\delta$  138.0, 137.2, 133.1, 130.1, 127.4, 122.6, 43.2; IR (neat): 3733, 3079, 1540, 1282, 1122, 968; MS ( $\text{ES}^+$ ) Calculated for  $[\text{C}_{13}\text{H}_{11}\text{NO}_2\text{S}_2\text{Na}]^+$ : 300.01; Found: 300.04

### 1-Propyl-1 $\lambda^4$ -benzo[1,3,2]dithiazole 3,3-dioxide

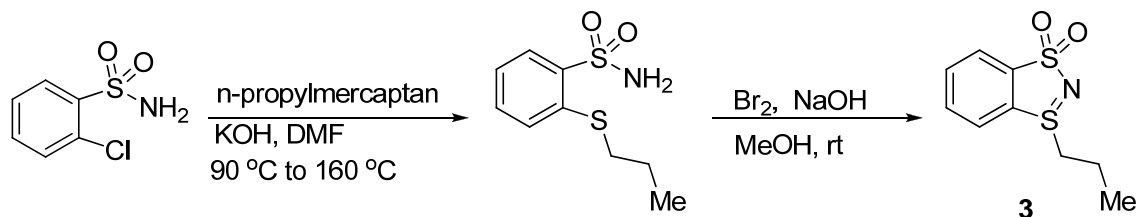

Compound **3** was prepared in 60 % yield from 2-chlorobenzenesulfonamide according to the following procedure: to a solution of potassium hydroxide (85%, 1.2 g, 20 mmol) and n-propylmercaptan (1.81 ml, 20 mmol) in 10 ml DMF at 90°C was added a solution of 2-chlorobenzenesulfonamide (1.91 g, 10 mmol) in 10 ml DMF. The reaction mixture was heated to reflux for 5 h, cooled, and the solvent was removed under *vacuum*. The residue was neutralized to pH = 7.0 by using 2 N hydrochloric acid and extracted with ether. The ether extracts were combined, washed with water and brine, dried with  $\text{MgSO}_4$  and concentrated under *vacuum*. The resulting residue was purified via silica gel flash chromatography (eluent: ethyl acetate: hexane = 1: 1) to give 2-propylsulfanylbenzenesulfonamide (1.62 g, 70% yield).

To a solution of the above sulfide (2 mmol, 462 mg) in  $\text{MeOH}/\text{H}_2\text{O}$  (10 mL/2mL) was added  $\text{Br}_2$  (3 mmol, 0.54 mL) and  $\text{NaOH}$  (4 mmol, 160 mg). The reaction mixture was stirred at room temperature for 30 min, and the solvent was removed under *vacuum*. The ether extracts were washed with water and brine, dried with  $\text{MgSO}_4$  and concentrated. The resulting residue was purified via silica gel flash chromatography (eluent: ethyl acetate: hexane = 2: 1) to give the desired cyclic sulfilimine **3** (0.412 g, 90% yield).  $^1\text{H}$

NMR (500 MHz, CDCl<sub>3</sub>) δ 8.04 (d, 1H, *J* = 8.0 Hz), 7.79 (dd, 1H, *J* = 7.5, 7.5 Hz), 7.73 (dd, 1H, *J* = 7.0, 7.0 Hz), 7.70 (dd, 1H, *J* = 7.0, 7.0 Hz), 3.29 (dt, 1H, *J* = 13.0, 8.0 Hz), 3.00 (dt, 1H, *J* = 13.0, 8.0 Hz), 1.88 – 1.96 (m, 2H), 1.13 (t, 1H, *J* = 7.5 Hz); <sup>13</sup>C NMR (125 MHz, CDCl<sub>3</sub>) δ 137.4, 133.6, 133.3, 132.4, 124.3, 123.7, 55.0, 18.0, 12.9; IR (neat): 3459, 1650, 1635, 1444, 1284, 1151,; MS (ES<sup>+</sup>) Calculated for [C<sub>9</sub>H<sub>11</sub>NO<sub>2</sub>S<sub>2</sub>Na]<sup>+</sup>: 252.01; Found: 252.04

**2-(*tert*-Butylsulfonyl)(*p*-toluenesulfonylimino)benzene**

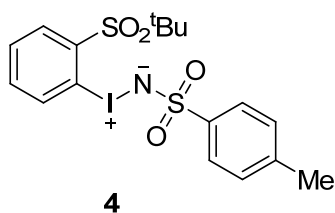

Compound **4** was prepared in 80 % yield according to the literature procedure.<sup>5</sup> <sup>1</sup>H NMR (400 MHz, CDCl<sub>3</sub>) δ 8.35 (d, 1H, *J* = 8.4 Hz), 7.90 (dd, 1H, *J* = 7.6, 1.6 Hz), 7.86 (dd, 1H, *J* = 8.4, 1.6 Hz), 7.82 (d, 2H, *J* = 7.6 Hz), 7.71 (dd, 1H, *J* = 7.6, 7.6 Hz), 7.22 (d, 2H, *J* = 8.0 Hz), 2.39 (s, 3H), 1.45 (s, 9H); <sup>13</sup>C NMR (125 MHz, CDCl<sub>3</sub>) δ 142.0, 140.5, 136.1, 133.4, 131.9, 130.6, 129.3, 128.5, 126.7, 115.3, 63.5, 23.5, 21.5; IR (neat): 3367, 1648, 1299, 1162, 1137, 1089, 732; MS (ES<sup>+</sup>) Calculated for [C<sub>17</sub>H<sub>20</sub>NIO<sub>4</sub>S<sub>2</sub>Na]<sup>+</sup>: 516.98; Found: 516.02

**1-(*p*-toluenesulfonylimino)pyridinium ylide<sup>6</sup>**

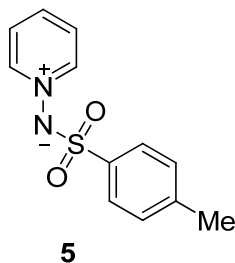

Compound **5** was prepared in 72 % yield according to the general procedure A (eluent: ethyl acetate: methanol = 20: 1). <sup>1</sup>H NMR (400 MHz, CDCl<sub>3</sub>) δ 8.46 (d, 2H, *J* = 7.6 Hz),

<sup>5</sup> Macikenas, D.; Skrzypczak-Jankun, E.; Protasiewicz, J. D. *J. Am. Chem. Soc.* **1999**, *121*, 7164.

<sup>6</sup> Jiang, Y.; Zhou, G. C.; He, G. L.; He, L.; Li, J. L.; Zheng, S. L. *Synthesis*, **2007**, *10*, 1459.

7.97 (dd, 1H,  $J = 7.6, 7.6$  Hz), 7.61 (d, 2H,  $J = 8.4$  Hz), 7.57 (d, 2H,  $J = 7.6$  Hz), 7.17 (d, 2H,  $J = 8.4$  Hz), 2.36 (s, 3H);  $^{13}\text{C}$  NMR (125 MHz,  $\text{CDCl}_3$ )  $\delta$  145.2, 141.6, 138.6, 138.2, 129.2, 127.0, 126.6, 21.4; IR (neat): 3419, 1650, 1635, 1465, 1272, 1133; MS ( $\text{ES}^+$ ) Calculated for  $[\text{C}_{12}\text{H}_{12}\text{N}_2\text{O}_2\text{SNa}]^+$ : 271.05; Found: 271.08

### 1-(*p*-toluenesulfonylimino)-4-acetylpyridinium ylide

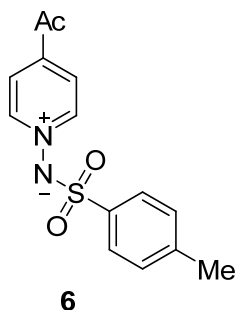

Compound **6** was prepared in 75 % yield according to the general procedure A (eluent: ethyl acetate: methanol = 10: 1).  $^1\text{H}$  NMR (400 MHz,  $\text{CDCl}_3$ )  $\delta$  8.66 (d, 2H,  $J = 6.8$  Hz), 7.95 (d, 2H,  $J = 6.8$  Hz), 7.71 (d, 2H,  $J = 7.6$  Hz), 7.21 (d, 2H,  $J = 7.6$  Hz), 2.65 (s, 3H), 2.37 (s, 3H);  $^{13}\text{C}$  NMR (125 MHz,  $\text{CDCl}_3$ )  $\delta$  193.3, 142.6, 140.5, 138.3, 129.7, 127.4, 125.2, 121.7, 26.9, 21.7; IR (neat): 3120, 1697, 1436, 1157, 1128; MS ( $\text{ES}^+$ ) Calculated for  $[\text{C}_{14}\text{H}_{14}\text{N}_2\text{O}_3\text{SNa}]^+$ : 313.06; Found: 313.09

### 1-(*p*-toluenesulfonylimino)-2-methylpyridinium ylide<sup>6</sup>

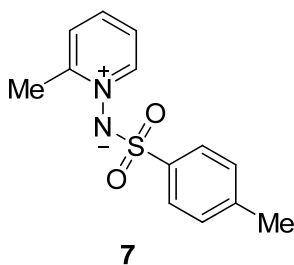

Compound **7** was prepared in 58 % yield according to the general procedure A (eluent: ethyl acetate: methanol = 10: 1).  $^1\text{H}$  NMR (400 MHz,  $\text{CDCl}_3$ )  $\delta$  8.62 (d, 1H,  $J = 6.0$  Hz), 7.82 (td, 1H,  $J = 8.0, 1.2$  Hz), 7.58 (d, 2H,  $J = 8.0$  Hz), 7.48 (d, 1H,  $J = 8.0$  Hz), 7.43 (dd, 1H,  $J = 7.6, 7.6$  Hz), 7.17 (d, 2H,  $J = 8.0$  Hz), 2.46 (s, 3H), 2.37 (s, 3H);  $^{13}\text{C}$  NMR (125 MHz,  $\text{CDCl}_3$ )  $\delta$  156.3, 146.6, 141.3, 140.7, 137.8, 129.3, 127.9, 126.5, 123.8, 21.4, 20.1;

IR (neat): 3419, 1492, 1459, 1276, 1137, 1087; MS (ES<sup>+</sup>) Calculated for [C<sub>13</sub>H<sub>14</sub>N<sub>2</sub>O<sub>2</sub>SNa]<sup>+</sup>: 285.07; Found: 285.06

**1-(*p*-toluenesulfonylimino)-3,5-dichloropyridinium ylide**

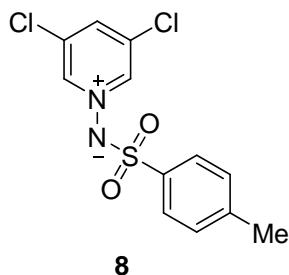

Compound **8** was prepared in 80 % yield according to the general procedure A (eluent: ethyl acetate: methanol = 20: 1). <sup>1</sup>H NMR (500 MHz, CDCl<sub>3</sub>) δ 8.51 (s, 2H), 7.77 (s, 1H), 7.71 (d, 2H, *J* = 8.5 Hz), 7.24 (d, 2H, *J* = 8.5 Hz), 2.39 (s, 3H); <sup>13</sup>C NMR (125 MHz, CDCl<sub>3</sub>) δ 142.8, 139.6, 137.9, 135.7, 134.5, 129.8, 127.4, 21.8; IR (neat): 3419, 1650, 1635, 1556, 1294, 1132; MS (ES<sup>+</sup>) Calculated for [C<sub>12</sub>H<sub>10</sub>N<sub>2</sub>O<sub>2</sub>Cl<sub>2</sub>SNa]<sup>+</sup>: 338.97; Found: 338.98

**1-(4-methoxybenzenesulfonylimino)-3,5-dichloropyridinium ylide**

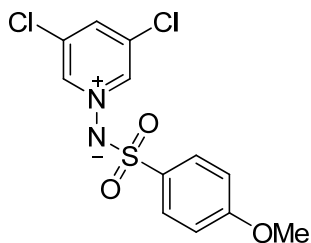

Compound was prepared in 75 % yield according to the general procedure A (eluent: ethyl acetate: methanol = 10: 1). <sup>1</sup>H NMR (500 MHz, CDCl<sub>3</sub>) δ 8.51 (s, 2H), 7.78 (s, 1H), 7.76 (d, 2H, *J* = 8.0 Hz), 6.92 (d, 2H, *J* = 8.0 Hz), 3.84 (s, 3H); <sup>13</sup>C NMR (125 MHz, CDCl<sub>3</sub>) δ 162.6, 139.2, 135.4, 134.5, 132.5, 129.5, 114.3, 55.8; IR (neat): 3095, 1593, 1495, 1255; MS (ES<sup>+</sup>) Calculated for [C<sub>12</sub>H<sub>10</sub>N<sub>2</sub>O<sub>3</sub>Cl<sub>2</sub>SNa]<sup>+</sup>: 354.97; Found: 354.96

**1-(4-nitrobenzenesulfonylimino)-3,5-dichloropyridinium ylide**



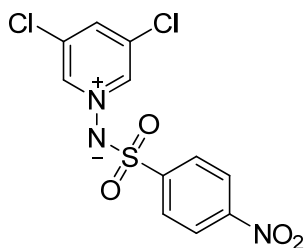

Compound was prepared in 78 % yield according to the general procedure A (eluent: ethyl acetate: methanol = 10: 1).  $^1\text{H}$  NMR (500 MHz,  $\text{CDCl}_3$ )  $\delta$  8.49 (s, 2H), 8.29 (d, 2H,  $J = 9.0$  Hz), 7.97 (d, 2H,  $J = 9.0$  Hz), 7.95 (s, 1H);  $^{13}\text{C}$  NMR (125 MHz,  $\text{CDCl}_3$ )  $\delta$  147.3, 144.2, 140.8, 137.6, 134.8, 128.1, 128.0, 124.2; IR (neat): 3099, 2981, 1920, 1556, 1527, 1348, 1139; MS ( $\text{ES}^+$ ) Calculated for  $[\text{C}_{11}\text{H}_7\text{N}_3\text{O}_4\text{Cl}_2\text{SNa}]^+$ : 369.94; Found: 369.95

### 1-(2,4,6-trimethylbenzenesulfonylimino)-3,5-dichloropyridinium ylide

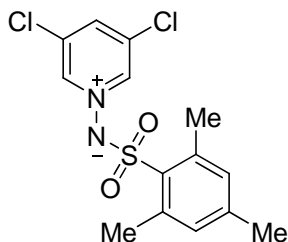

Compound was prepared in 60 % yield according to the general procedure A (eluent: ethyl acetate).  $^1\text{H}$  NMR (500 MHz,  $\text{CDCl}_3$ )  $\delta$  8.37 (s, 2H), 7.68 (s, 1H), 6.92 (s, 2H), 2.64 (s, 6H), 2.27 (s, 3H);  $^{13}\text{C}$  NMR (125 MHz,  $\text{CDCl}_3$ )  $\delta$  144.2, 139.0, 137.8, 134.2, 133.8, 133.7, 131.4, 22.7, 20.6; IR (neat): 2958, 1720, 1560, 1382, 1313, 1148; MS ( $\text{ES}^+$ ) Calculated for  $[\text{C}_{14}\text{H}_{14}\text{N}_2\text{O}_2\text{Cl}_2\text{SNa}]^+$ : 367.01; Found: 366.95

### 1-(*p*-toluenesulfonylimino)-8-methylquinolinium ylide

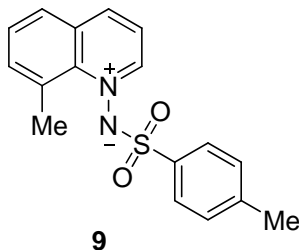

Compound **9** was prepared in 20 % yield according to the general procedure A (eluent: ethyl acetate: methanol = 10: 1).  $^1\text{H}$  NMR (400 MHz,  $\text{CDCl}_3$ )  $\delta$  8.77 (dd, 1H,  $J = 6.0, 1.6$  Hz), 8.41 (dd, 1H,  $J = 8.0, 1.6$  Hz), 7.79 – 7.82 (m, 1H), 7.56 – 7.61 (m, 2H), 7.48 (dd, 1H,  $J = 8.4, 6.0$  Hz), 7.40 (d,  $J = 8.4$  Hz), 7.05 (d,  $J = 8.4$  Hz), 3.08 (s, 3H), 2.31 (s, 3H);  $^{13}\text{C}$  NMR (125 MHz,  $\text{CDCl}_3$ )  $\delta$  148.7, 141.5, 141.0, 140.8, 139.4, 137.9, 133.7, 131.8, 129.0, 128.9, 127.3, 126.6, 119.8, 26.0, 21.4; IR (neat): 3419, 3066, 2933, 2244, 1519, 1276, 1135, 1085, 881; MS ( $\text{ES}^+$ ) Calculated for  $[\text{C}_{17}\text{H}_{16}\text{N}_2\text{O}_2\text{SNa}]^+$ : 335.08; Found: 335.11

### 3-(6-(*tert*-Butyldimethylsilyloxy)hex-1-ynyl)oxazolidin-2-one<sup>7</sup>

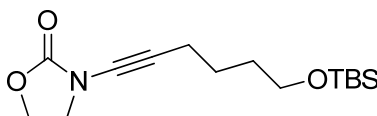

**10**

Compound **10** was prepared in 70 % yield according to the general procedure B (eluent: ethyl acetate: hexanes = 1: 2).  $^1\text{H}$  NMR (500 MHz,  $\text{CDCl}_3$ )  $\delta$  4.41 (t, 2H,  $J = 7.5$  Hz), 3.87 (t, 2H,  $J = 7.5$  Hz), 3.62 (t, 2H,  $J = 6.0$  Hz), 2.32 – 2.35 (m, 2H), 1.55 – 1.62 (m, 4H), 0.89 (s, 9H), 0.05 (s, 3H);  $^{13}\text{C}$  NMR (125 MHz,  $\text{CDCl}_3$ )  $\delta$  156.5, 71.0, 70.1, 62.8, 62.6, 47.0, 32.0, 26.0, 25.3, 18.4, -5.2; IR (neat): 2929, 2857, 2271, 1770, 1415, 1112, 836; MS ( $\text{ES}^+$ ) Calculated for  $[\text{C}_{15}\text{H}_{27}\text{NO}_3\text{SiNa}]^+$ : 320.17; Found: 320.18

### 3-(Hex-1-ynyl)oxazolidin-2-one<sup>8</sup>

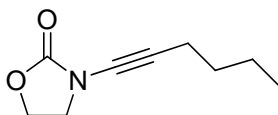

**13a**

Compound **13a** was prepared in 75 % yield according to the general procedure B (eluent: ethyl acetate: hexanes = 1: 2).  $^1\text{H}$  NMR (400 MHz,  $\text{CDCl}_3$ )  $\delta$  4.41 (t, 2H,  $J = 8.0$  Hz), 3.87 (t, 2H,  $J = 8.0$  Hz), 2.30 (t, 2H,  $J = 7.2$  Hz), 1.47 – 1.55 (m, 2H), 1.36 – 1.45 (m, 2H), 0.90 (t, 3H,  $J = 7.2$  Hz);  $^{13}\text{C}$  NMR (125 MHz,  $\text{CDCl}_3$ )  $\delta$  156.5, 71.2, 70.0, 62.8, 47.1, 30.9, 22.0, 18.1, 13.6; IR (neat): 2933, 2873, 2273, 1770,

<sup>7</sup> Lu, B.; Li, C.; Zhang, L. *J. Am. Chem. Soc.* **2010**, *132*, 14070-14072.

<sup>8</sup> Davies, P. W.; Cremonesi, A.; Martin, N. *Chem. Commun.* **2011**, 379.

1415, 1207, 1116, 1033; MS (ES<sup>+</sup>) Calculated for [C<sub>9</sub>H<sub>13</sub>NO<sub>2</sub>Na]<sup>+</sup>: 190.08; Found: 190.10

### 3-(6-Chlorohex-1-ynyl)oxazolidin-2-one<sup>8</sup>

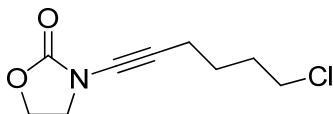

**13b**

Compound **13b** was prepared in 50 % yield according to the literature procedure (eluent: ethyl acetate: hexanes = 1: 2). <sup>1</sup>H NMR (500 MHz, CDCl<sub>3</sub>) δ 4.38 – 4.42 (m, 2H), 3.84 – 3.88 (m, 2H), 3.54 – 3.57 (m, 2H), 2.33 – 2.36 (m, 2H), 1.84 – 1.89 (m, 2H), 1.65 – 1.69 (m, 2H); <sup>13</sup>C NMR (125 MHz, CDCl<sub>3</sub>) δ 156.5, 70.6, 70.2, 62.8, 46.9, 44.5, 31.5, 25.9, 17.8; IR (neat): 2946, 2267, 1770, 1417, 1207, 1114, 1035; MS (ES<sup>+</sup>) Calculated for [C<sub>9</sub>H<sub>12</sub>NCIO<sub>2</sub>Na]<sup>+</sup>: 224.05; Found: 224.05

### 3-(5-Phenylpent-1-ynyl)oxazolidin-2-one

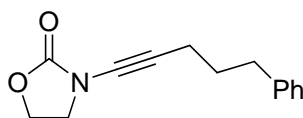

**13c**

Compound **13c** was prepared in 80 % yield according to the general procedure B (eluent: ethyl acetate: hexanes = 1: 2). <sup>1</sup>H NMR (400 MHz, CDCl<sub>3</sub>) δ 7.26 – 7.31 (m, 2H), 7.17 – 7.21 (m, 3H), 4.42 (t, 2H, *J* = 8.0 Hz), 3.87 (t, 2H, *J* = 8.0 Hz), 2.72 (t, 2H, *J* = 7.6 Hz), 2.33 (t, 2H, *J* = 7.2 Hz), 1.82 – 1.89 (m, 2H); <sup>13</sup>C NMR (125 MHz, CDCl<sub>3</sub>) δ 156.6, 141.4, 128.4, 128.3, 125.8, 70.7, 70.5, 62.8, 47.0, 34.8, 30.3, 17.9; IR (neat): 2923, 2269, 1770, 1415, 1112, 1207; MS (ES<sup>+</sup>) Calculated for [C<sub>14</sub>H<sub>15</sub>NO<sub>2</sub>Na]<sup>+</sup>: 252.10; Found: 252.13

### 6-(2-Oxooxazolidin-3-yl)hex-5-ynyl acetate

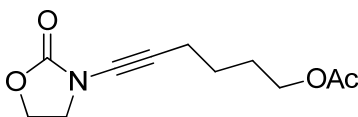

**13d**

Compound **13d** was prepared in 76 % yield according to the general procedure B (eluent: ethyl acetate: hexanes = 1: 2).  $^1\text{H}$  NMR (500 MHz,  $\text{CDCl}_3$ )  $\delta$  4.41 (t, 2H,  $J = 8.0$  Hz), 4.07 (t, 2H,  $J = 7.0$  Hz), 3.87 (t, 2H,  $J = 8.0$  Hz), 2.35 (t, 2H,  $J = 7.0$  Hz), 2.04 (s, 3H), 1.70 – 1.76 (m, 2H), 1.56 – 1.62 (m, 2H);  $^{13}\text{C}$  NMR (125 MHz,  $\text{CDCl}_3$ )  $\delta$  171.0, 156.5, 70.5, 63.9, 62.8, 47.0, 27.8, 25.2, 21.0, 18.1; IR (neat): 2954, 2269, 1770, 1729, 1417, 1245, 1035; MS ( $\text{ES}^+$ ) Calculated for  $[\text{C}_{11}\text{H}_{15}\text{NO}_4\text{Na}]^+$ : 248.09; Found: 248.09

### 6-(2-Oxooxazolidin-3-yl)hex-5-ynyl methanesulfonate

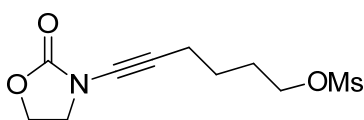

**13e**

Compound **13e** was prepared in 65 % yield according to the general procedure B (eluent: ethyl acetate: hexanes = 1: 1).  $^1\text{H}$  NMR (500 MHz,  $\text{CDCl}_3$ )  $\delta$  4.41 (t, 2H,  $J = 8.0$  Hz), 4.26 (t, 2H,  $J = 6.5$  Hz), 3.87 (t, 2H,  $J = 8.0$  Hz), 3.01 (s, 3H), 2.38 (t, 2H,  $J = 7.0$  Hz), 1.85 – 1.91 (m, 2H), 1.61 – 1.69 (m, 2H);  $^{13}\text{C}$  NMR (125 MHz,  $\text{CDCl}_3$ )  $\delta$  156.5, 70.9, 70.0, 69.5, 62.8, 46.9, 37.4, 28.2, 24.6, 17.9; IR (neat): 2938, 1768, 1419, 1349, 1170; MS ( $\text{ES}^+$ ) Calculated for  $[\text{C}_{10}\text{H}_{15}\text{NO}_5\text{SNa}]^+$ : 284.06; Found: 284.09

### 3-(3-(Benzyloxy)prop-1-ynyl)oxazolidin-2-one

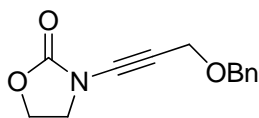

**13f**

Compound **13f** was prepared in 70 % yield according to the general procedure B (eluent: ethyl acetate: hexanes = 1: 1).  $^1\text{H}$  NMR (400 MHz,  $\text{CDCl}_3$ )  $\delta$  7.27 – 7.37 (m, 5H), 4.60 (s, 2H), 4.46 (t, 2H,  $J = 8.0$  Hz), 4.34 (s, 2H), 3.92 (t, 2H,  $J = 8.0$  Hz);  $^{13}\text{C}$  NMR (125 MHz,  $\text{CDCl}_3$ )  $\delta$  156.0, 137.3, 128.3, 128.0, 127.7, 71.5, 67.8, 64.8, 63.0, 57.5, 46.7; IR (neat): 2861, 2260, 1770, 1419, 1205; MS ( $\text{ES}^+$ ) Calculated for  $[\text{C}_{13}\text{H}_{13}\text{NO}_3\text{Na}]^+$ : 254.08; Found: 254.08

### 3-(Cyclohexylethynyl)oxazolidin-2-one<sup>8</sup>

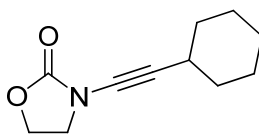

**13g**

Compound **13g** was prepared in 80 % yield according to the general procedure B (eluent: ethyl acetate: hexanes = 1: 2). <sup>1</sup>H NMR (500 MHz, CDCl<sub>3</sub>) δ 4.38 (t, 2H, *J* = 8.5 Hz), 3.85 (t, 2H, *J* = 8.5 Hz), 2.44 – 2.48 (m, 1H), 1.75 – 1.83 (m, 2H), 1.63 – 1.71 (m, 2H), 1.46 – 1.52 (m, 1H), 1.36 – 1.46 (m, 2H), 1.22 – 1.32 (m, 3H); <sup>13</sup>C NMR (125 MHz, CDCl<sub>3</sub>) δ 156.7, 75.2, 70.4, 63.0, 47.4, 33.0, 29.0, 26.0, 25.1; IR (neat): 2929, 2854, 2269, 1770, 1415, 1209; MS (ES<sup>+</sup>) Calculated for [C<sub>11</sub>H<sub>15</sub>NO<sub>2</sub>Na]<sup>+</sup>: 216.10; Found: 216.10

### 3-(Cyclopentylethynyl)oxazolidin-2-one

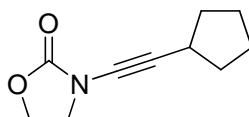

**13h**

Compound **13h** was prepared in 77 % yield according to the general procedure B (eluent: ethyl acetate: hexanes = 1: 2). <sup>1</sup>H NMR (400 MHz, CDCl<sub>3</sub>) δ 4.38 (t, 2H, *J* = 8.0 Hz), 3.84 (t, 2H, *J* = 8.0 Hz), 2.65 – 2.73 (m, 1H), 1.84 – 1.94 (m, 2H), 1.64 – 1.71 (m, 2H), 1.48 – 1.61 (m, 4H); <sup>13</sup>C NMR (125 MHz, CDCl<sub>3</sub>) δ 156.7, 75.2, 70.0, 63.0, 47.3, 34.1, 30.0, 25.1; IR (neat): 2960, 2869, 1770, 1421, 1209, 1114; MS (ES<sup>+</sup>) Calculated for [C<sub>10</sub>H<sub>13</sub>NO<sub>2</sub>Na]<sup>+</sup>: 202.08; Found: 202.09

### *N*-1-Hexyn-1-yl-4-methyl-*N*-phenylbenzenesulfonamide<sup>8</sup>

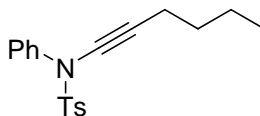

**13l**

Compound **13l** was prepared in 55 % yield according to the general procedure B (eluent: ethyl acetate: hexanes = 1: 2). <sup>1</sup>H NMR (500 MHz, CDCl<sub>3</sub>) δ 7.55 (d, 2H, *J* = 8.5 Hz), 7.24 – 7.33 (m, 7H), 2.43 (s, 3H), 2.29 (t, 2H, *J* = 7.0 Hz), 1.40 – 1.52 (m, 2H), 1.35 –

1.39 (m, 2H), 0.90 (t, 3H,  $J = 7.5$  Hz);  $^{13}\text{C}$  NMR (125 MHz,  $\text{CDCl}_3$ )  $\delta$  144.5, 139.3, 132.9, 129.2, 128.8, 128.2, 127.2, 126.0, 73.8, 70.3, 30.9, 21.9, 21.7, 18.2, 13.6; IR (neat): 2931, 2254, 1594, 1488, 1373, 1176; MS ( $\text{ES}^+$ ) Calculated for  $[\text{C}_{19}\text{H}_{21}\text{NO}_2\text{SNa}]^+$ : 350.11; Found: 350.12

***N*-(6-(*tert*-Butyldimethylsilyloxy)-1-(2-oxooxazolidin-3-yl)hex-2-enylidene)-4-methylbenzenesulfonamide**

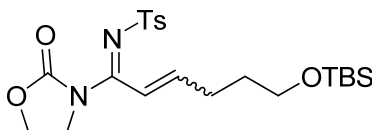

**11**

Compound **11** (E/Z = 4/1) was prepared in 92 % yield according to the general procedure C (eluent: ethyl acetate: hexanes = 1: 1).  $^1\text{H}$  NMR (500 MHz,  $\text{CDCl}_3$ )  $\delta$  7.80 (d, 2H,  $J = 8.0$  Hz), 7.28 (d, 2H,  $J = 8.0$  Hz), 6.86 (dt, 1H,  $J = 16.0, 7.0$  Hz), 6.73 (d, 2H,  $J = 16.0$  Hz), 6.29 (minor, d, 2H,  $J = 12.5$  Hz), 6.86 (minor, dt, 1H,  $J = 12.0, 7.5$  Hz), 4.37 (t, 2H,  $J = 8.0$  Hz), 3.95 (t, 2H,  $J = 8.0$  Hz), 3.68 (t, 2H,  $J = 6.5$  Hz), 2.41 (s, 3H), 2.36 – 2.42 (m, 2H), 1.71 – 1.77 (m, 2H), 0.89 (s, 9H), 0.05 (s, 6H);  $^{13}\text{C}$  NMR (125 MHz,  $\text{CDCl}_3$ )  $\delta$  162.0, 153.0, 150.2, 143.1, 139.4, 129.3, 126.6, 118.8, 62.2, 61.9, 44.6, 30.8, 29.9, 25.9, 21.5, 18.3, -5.4; IR (neat): 3419, 2952, 2929, 1650, 1573, 1394, 1089; MS ( $\text{ES}^+$ ) Calculated for  $[\text{C}_{22}\text{H}_{34}\text{N}_2\text{O}_5\text{SSiNa}]^+$ : 489.19; Found: 489.19

**4-Methyl-*N*-(1-(2-oxooxazolidin-3-yl)hex-2-enylidene)benzenesulfonamide**

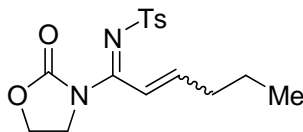

**14a**

Compound **14a** (E/Z = 4/1) was prepared in 93 % yield according to the general procedure C (eluent: ethyl acetate: hexanes = 1: 1).  $^1\text{H}$  NMR (500 MHz,  $\text{CDCl}_3$ )  $\delta$  7.75 (d, 2H,  $J = 8.0$  Hz), 7.23 (d, 2H,  $J = 8.0$  Hz), 6.82 (dt, 1H,  $J = 16.0, 7.0$  Hz), 6.68 (d, 2H,  $J = 16.0$  Hz), 4.32 (t, 2H,  $J = 8.0$  Hz), 3.88 (t, 2H,  $J = 8.0$  Hz), 2.37 (s, 3H), 2.24 – 2.29 (m, 2H), 1.48 – 1.56 (m, 2H), 0.93 (t, 3H,  $J = 8.0$  Hz);  $^{13}\text{C}$  NMR (125 MHz,  $\text{CDCl}_3$ )

$\delta$  162.0, 152.9, 150.4, 143.0, 139.3, 129.2, 126.5, 118.7, 61.9, 44.7, 35.4, 21.5, 21.0, 13.7; IR (neat): 3419, 1783, 1648, 1540, 1394, 1349, 1153, 1089 ; MS (ES<sup>+</sup>) Calculated for [C<sub>16</sub>H<sub>20</sub>N<sub>2</sub>O<sub>4</sub>SNa]<sup>+</sup>: 359.10; Found: 359.10

***N*-(6-Chloro-1-(2-oxooxazolidin-3-yl)hex-2-enylidene)-4-methylbenzenesulfonamide**

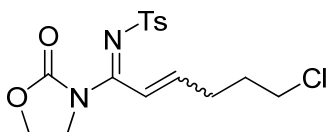

**14b**

Compound **14b** (E/Z = 2/1) was prepared in 81 % yield according to the general procedure C (eluent: ethyl acetate: hexanes = 1: 1). <sup>1</sup>H NMR (500 MHz, CDCl<sub>3</sub>)  $\delta$  7.79 (d, 2H, *J* = 8.0 Hz), 7.28 (d, 2H, *J* = 8.0 Hz), 6.72 – 6.81 (m, 2H), 6.37 (minor, d, 1H, *J* = 12.0 Hz), 5.91 (minor, dt, 1H, *J* = 12.0, 8.0 Hz), 4.38 – 4.42 (minor, m, 2H), 4.35 – 4.40 (m, 2H), 4.00 (minor, t, 2H, *J* = 8.0 Hz), 3.94 (t, 2H, *J* = 8.0 Hz), 3.64 (t, 2H, *J* = 7.0 Hz), 3.54 (minor, t, 2H, *J* = 6.0 Hz), 2.46 – 2.52 (m, 2H), 2.37 (s, 3H), 2.22 – 2.28 (minor, m, 2H), 1.97 – 2.04 (m, 2H), 1.84 – 1.90 (minor, m, 2H); <sup>13</sup>C NMR (125 MHz, CDCl<sub>3</sub>)  $\delta$  162.4, 161.9, 153.3, 152.7, 147.8, 147.7, 143.7, 143.5, 139.5, 138.9, 137.4, 129.6, 127.3, 126.9, 121.0, 120.4, 64.5, 62.4, 62.2, 44.9, 44.8, 44.3, 44.2, 30.9, 30.7, 30.5, 27.5, 21.8; IR (neat): 3312, 2936, 2763, 2739, 2119, 1443, 1352; MS (ES<sup>+</sup>) Calculated for [C<sub>16</sub>H<sub>19</sub>ClN<sub>2</sub>O<sub>4</sub>SNa]<sup>+</sup>: 393.07; Found: 393.07

**4-Methyl-*N*-(1-(2-oxooxazolidin-3-yl)-5-phenylpent-2-enylidene)benzenesulfonamide**

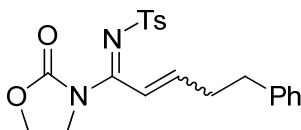

**14c**

Compound **14c** (E/Z = 3/1) was prepared in 88 % yield according to the general procedure C (eluent: ethyl acetate: hexanes = 1: 1). <sup>1</sup>H NMR (500 MHz, CDCl<sub>3</sub>)  $\delta$  7.81 (d, 2H, *J* = 8.5 Hz), 7.16 – 7.32 (m, 7H), 6.88 (dt, *J* = 16.0, 6.0 Hz, 1H), 6.79 (d, 1H, *J* = 16.0 Hz), 6.30 (minor, d, 1H, *J* = 12.0 Hz), 6.02 (minor, dt, 1H, *J* = 12.0, 7.5 Hz), 4.37 (t,

1H,  $J = 8.0$  Hz), 3.95 (t, 1H,  $J = 8.0$  Hz), 2.86 (t, 1H,  $J = 8.0$  Hz), 2.63 – 2.67 (m, 2H), 2.43 (s, 3H);  $^{13}\text{C}$  NMR (125 MHz,  $\text{CDCl}_3$ )  $\delta$  161.8, 152.9, 148.8, 143.0, 140.8, 139.3, 129.3, 128.4, 128.3, 127.0, 126.3, 119.0, 62.0, 44.6, 35.1, 33.9, 21.6; IR (neat): 2923, 2854, 1781, 1648, 1552, 1382, 1313, 1149, 1091; MS ( $\text{ES}^+$ ) Calculated for  $[\text{C}_{21}\text{H}_{22}\text{N}_2\text{O}_4\text{SNa}]^+$ : 421.12; Found: 421.16

**(6E)-6-(2-Oxooxazolidin-3-yl)-6-(tosylimino)hex-4-enyl acetate**

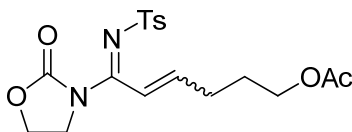

**14d**

Compound **14d** (E/Z = 2/1) was prepared in 79 % yield according to the general procedure C (eluent: ethyl acetate: hexanes = 1: 1).  $^1\text{H}$  NMR (500 MHz,  $\text{CDCl}_3$ )  $\delta$  7.78 (d, 2H,  $J = 8.0$  Hz), 7.27 (d, 2H,  $J = 8.0$  Hz), 6.84 (dt, 1H,  $J = 16.0, 6.5$  Hz), 6.74 (d, 1H,  $J = 16.0$  Hz), 6.31 (minor, d, 1H,  $J = 12.5$  Hz), 5.99 (dt, 1H,  $J = 12.5, 7.5$  Hz), 4.41 (minor, t, 2H,  $J = 8.0$  Hz), 4.36 (t, 2H,  $J = 8.0$  Hz), 4.14 (t, 2H,  $J = 8.0$  Hz), 3.97 – 4.06 (m, 2H), 3.93 (t, 2H,  $J = 8.0$  Hz), 2.41 (s, 3H), 2.28 – 2.42 (m, 2H), 2.09 – 2.13 (minor, m, 2H), 2.07 (s, 3H), 2.02 (minor, s, 3H), 1.84 – 1.90 (m, 2H), 1.70 – 1.74 (minor, m, 2H);  $^{13}\text{C}$  NMR (125 MHz,  $\text{CDCl}_3$ )  $\delta$  171.3, 171.2, 162.4, 162.0, 153.3, 152.6, 148.5, 143.7, 143.4, 139.6, 138.9, 138.6, 129.6, 127.3, 126.8, 119.8, 119.6, 101.9, 63.9, 63.7, 62.2, 44.8, 44.3, 30.0, 29.8, 27.6, 27.2, 27.0, 21.8, 21.7, 21.2, 19.3; IR (neat): 3747, 3733, 2954, 1783, 1731, 1558, 1540, 1394, 1243, 1153, 1089; MS ( $\text{ES}^+$ ) Calculated for  $[\text{C}_{18}\text{H}_{22}\text{N}_2\text{O}_6\text{SNa}]^+$ : 417.11; Found: 417.10

**(6Z)-6-(2-Oxooxazolidin-3-yl)-6-(tosylimino)hex-4-enyl methanesulfonate**

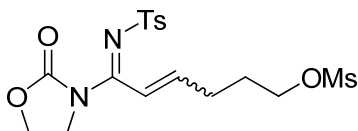

**14e**

Compound **14e** (E/Z = 3/2) was prepared in 72 % yield according to the general procedure C (eluent: ethyl acetate: hexanes = 1: 1).  $^1\text{H}$  NMR (500 MHz,  $\text{CDCl}_3$ )  $\delta$  7.77



(d, 2H,  $J = 8.0$  Hz), 7.28 (d, 2H,  $J = 8.0$  Hz), 6.71 – 6.78 (m, 2H), 6.39 (minor, d, 1H,  $J = 12.5$  Hz), 5.94 (minor, dt, 1H,  $J = 12.5, 7.5$  Hz), 4.43 (minor, t, 2H,  $J = 8.0$  Hz), 4.38 (t, 2H,  $J = 8.0$  Hz), 4.33 (t, 2H,  $J = 6.0$  Hz), 4.20 (minor, t, 2H,  $J = 6.0$  Hz), 4.00 (minor, t, 2H,  $J = 8.0$  Hz), 3.93 (t, 2H,  $J = 8.0$  Hz), 3.03 (s, 3H), 2.99 (minor, s, 3H), 2.43 – 2.49 (m, 2H), 2.42 (s, 3H), 2.22 – 2.27 (minor, m, 2H), 1.99 – 2.03 (m, 2H), 1.86 – 1.90 (minor, m, 2H);  $^{13}\text{C}$  NMR (125 MHz,  $\text{CDCl}_3$ )  $\delta$  162.2, 161.8, 153.3, 152.9, 146.8, 143.7, 143.5, 139.5, 138.9, 137.2, 129.6, 129.1, 127.2, 126.8, 121.2, 120.8, 69.9, 69.3, 62.4, 62.3, 44.7, 44.2, 37.6, 37.3, 29.1, 28.1, 27.5, 26.5, 21.8, 21.7; IR (neat): 2925, 1781, 1648, 1552, 1402, 1351, 1172, 1153; MS ( $\text{ES}^+$ ) Calculated for  $[\text{C}_{17}\text{H}_{22}\text{N}_2\text{O}_7\text{S}_2\text{Na}]^+$ : 453.08; Found: 453.07

***N*-(3-(Benzyloxy)-1-(2-oxooxazolidin-3-yl)allylidene)-4-methylbenzenesulfonamide**

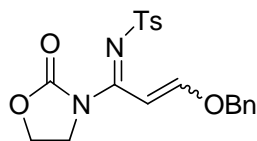

**14f**

Compound **14f** (E/Z = 5/1) was prepared in 75 % yield according to the general procedure C (eluent: ethyl acetate: hexanes = 1: 1).  $^1\text{H}$  NMR (500 MHz,  $\text{CDCl}_3$ )  $\delta$  8.00 (d, 2H,  $J = 12.0$  Hz), 7.80 (d, 2H,  $J = 8.0$  Hz), 7.35 – 7.41 (m, 5H), 7.27 (d, 2H,  $J = 8.0$  Hz), 6.61 (d, 2H,  $J = 12.0$  Hz), 5.09 (s, 2H), 4.33 (t, 2H,  $J = 8.0$  Hz), 3.95 (t, 2H,  $J = 8.0$  Hz), 2.42 (s, 3H);  $^{13}\text{C}$  NMR (125 MHz,  $\text{CDCl}_3$ )  $\delta$  165.4, 160.5, 153.6, 142.9, 139.6, 134.6, 129.3, 128.7, 128.6, 127.9, 126.4, 96.2, 73.8, 61.7, 45.2, 21.6; IR (neat): 3747, 3733, 3033, 2321, 1772, 1633, 1540, 1384, 1145, 1089; MS ( $\text{ES}^+$ ) Calculated for  $[\text{C}_{20}\text{H}_{20}\text{N}_2\text{O}_5\text{SNa}]^+$ : 423.09; Found: 423.14

***E*)-*N*-(2-Cyclohexylidene-1-(2-oxooxazolidin-3-yl)ethylidene)-4-methylbenzenesulfonamide**

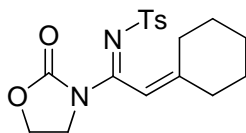

**14g**

Compound **14g** was prepared in 90 % yield according to the general procedure C (eluent: ethyl acetate: hexanes = 1: 1).  $^1\text{H}$  NMR (500 MHz,  $\text{CDCl}_3$ )  $\delta$  7.85 (d, 2H,  $J = 8.0$  Hz), 7.35 (d, 2H,  $J = 8.0$  Hz), 5.98 (s, 1H), 4.46 (t, 2H,  $J = 8.0$  Hz), 4.12 (t, 2H,  $J = 8.0$  Hz), 2.50 (s, 3H), 2.29 – 2.32 (m, 2H), 2.02 – 2.07 (m, 2H), 1.69 – 1.73 (m, 2H), 1.52 – 1.60 (m, 4H);  $^{13}\text{C}$  NMR (125 MHz,  $\text{CDCl}_3$ )  $\delta$  163.4, 152.3, 152.0, 143.1, 138.7, 129.1, 127.1, 110.9, 61.7, 44.3, 36.3, 31.6, 27.1, 26.6, 25.8, 21.5; IR (neat): 3419, 2933, 2857, 1791, 1650, 1540, 1384, 1375, 1155, 1089; MS ( $\text{ES}^+$ ) Calculated for  $[\text{C}_{18}\text{H}_{22}\text{N}_2\text{O}_4\text{SNa}]^+$ : 385.12; Found: 385.12

***N*-(2-Cyclopentylidene-1-(2-oxooxazolidin-3-yl)ethylidene)-4-methylbenzenesulfonamide (14h)**

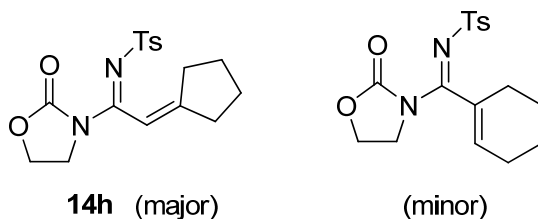

Compound **14h** was prepared in 76% yield along with the cyclohexene side product in 15% yield according to the general procedure C (eluent: ethyl acetate: hexanes = 1: 1).  $^1\text{H}$  NMR (500 MHz,  $\text{CDCl}_3$ )  $\delta$  7.84 (d, 2H,  $J = 8.0$  Hz), 7.36 (d, 2H,  $J = 8.0$  Hz), 6.34 (brs, 1H), 5.98 (minor, brs, 1H), 4.47 (t, 2H,  $J = 8.0$  Hz), 4.12 (t, 2H,  $J = 8.0$  Hz), 2.50 – 2.53 (m, 2H), 2.50 (s, 3H), 2.13 – 2.19 (m, 2H), 1.73 – 1.76 (m, 4H);  $^{13}\text{C}$  NMR (125 MHz,  $\text{CDCl}_3$ )  $\delta$  163.6, 159.4, 152.4, 143.4, 138.9, 129.4, 127.2, 110.5, 62.2, 44.8, 34.8, 31.6, 26.4, 25.6, 21.8; IR (neat): 3448, 2956, 2356, 1791, 1540, 1384, 1155, 1087; MS ( $\text{ES}^+$ ) Calculated for  $[\text{C}_{17}\text{H}_{20}\text{N}_2\text{O}_4\text{SNa}]^+$ : 371.10; Found: 371.11

**4-Methoxy-*N*-(1-(2-oxooxazolidin-3-yl)hex-2-enylidene)benzenesulfonamide**

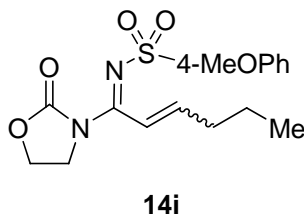

Compound **14i** (E/Z = 5/1) was prepared in 85 % yield according to the general procedure C (eluent: ethyl acetate: hexanes = 1: 1). <sup>1</sup>H NMR (400 MHz, CDCl<sub>3</sub>) δ 7.83 (d, 2H, *J* = 8.8 Hz), 6.94 (d, 2H, *J* = 8.8 Hz), 6.78 – 6.86 (m, 1H), 6.70 (d, 1H, *J* = 16.0 Hz), 4.36 (t, 2H, *J* = 8.0 Hz), 3.96 (t, 2H, *J* = 8.0 Hz), 3.85 (s, 3H), 2.27 – 2.32 (m, 2H), 1.50 – 1.60 (m, 2H), 0.97 (t, 3H, *J* = 7.2 Hz); <sup>13</sup>C NMR (125 MHz, CDCl<sub>3</sub>) δ 162.9, 162.1, 153.3, 150.6, 134.4, 129.0, 119.0, 114.1, 62.2, 55.8, 44.9, 35.7, 21.3, 13.9; IR (neat): 3312, 2936, 2763, 2739, 2119, 1443, 1352; MS (ES<sup>+</sup>) Calculated for [C<sub>16</sub>H<sub>20</sub>N<sub>2</sub>O<sub>5</sub>SNa]<sup>+</sup>: 375.10; Found: 375.10

#### 4-Nitro-*N*-(1-(2-oxooxazolidin-3-yl)hex-2-enylidene)benzenesulfonamide

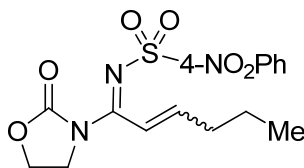

**14j**

Compound **14j** (E/Z = 4/1) was prepared in 88 % yield according to the general procedure C (eluent: ethyl acetate: hexanes = 1: 1). <sup>1</sup>H NMR (500 MHz, CDCl<sub>3</sub>) δ 8.34 (d, 2H, *J* = 8.5 Hz), 8.12 (d, 2H, *J* = 8.5 Hz), 7.02 (td, 1H, *J* = 16.0, 7.0 Hz), 6.82 (d, 1H, *J* = 16.0 Hz), 4.40 (t, 2H, *J* = 8.0 Hz), 3.93 (t, 2H, *J* = 8.0 Hz), 2.33 – 2.38 (m, 2H), 1.56 – 1.64 (m, 2H), 1.01 (t, 3H, *J* = 7.5 Hz); <sup>13</sup>C NMR (125 MHz, CDCl<sub>3</sub>) δ 163.3, 152.8, 152.3, 150.0, 148.2, 128.1, 124.3, 119.3, 62.2, 44.8, 35.9, 21.4, 13.9; IR (neat): 3733, 2960, 1783, 1648, 1558, 1384, 1313, 1153, 1089; MS (ES<sup>+</sup>) Calculated for [C<sub>15</sub>H<sub>17</sub>N<sub>3</sub>O<sub>6</sub>SNa]<sup>+</sup>: 390.07; Found: 390.10

#### 2,4,6-Trimethyl-*N*-(1-(2-oxooxazolidin-3-yl)hex-2-enylidene)benzenesulfonamide

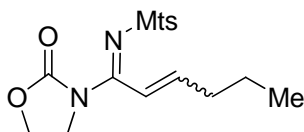

**14k**

Compound **14k** (E/Z = 5/1) was prepared in 80 % yield according to the general procedure C (eluent: ethyl acetate: hexanes = 1: 2). <sup>1</sup>H NMR (400 MHz, CDCl<sub>3</sub>) δ 6.92 (s, 2H), 6.69 (dt, 1H, *J* = 16.8, 6.8 Hz), 6.60 (d, 1H, *J* = 16.8 Hz), 4.37 (t, 2H, *J* = 8.0 Hz),

3.96 (t, 2H,  $J = 8.0$  Hz), 2.61 (s, 6H), 2.19 (s, 3H), 2.19 - 2.25 (m, 2H), 1.47 - 1.53 (m, 2H), 0.94 (t, 3H,  $J = 7.2$  Hz);  $^{13}\text{C}$  NMR (125 MHz,  $\text{CDCl}_3$ )  $\delta$  161.9, 153.2, 149.4, 141.9, 139.4, 138.7, 131.5, 118.6, 61.9, 44.8, 35.3, 22.8, 21.0, 20.8, 13.6; IR (neat): 3744, 3032, 1558, 1440, 1297, 1139; MS ( $\text{ES}^+$ ) Calculated for  $[\text{C}_{18}\text{H}_{24}\text{N}_2\text{O}_4\text{SNa}]^+$ : 387.14; Found: 387.08

**(1E)-N-Phenyl-N,N'-ditosylhex-2-enimidamide**

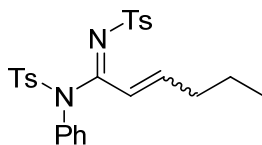

**14I**

Compound **14I** ( $E/Z = 3/2$ ) was prepared in 62 % yield according to the general procedure C (eluent: ethyl acetate: hexanes = 1: 1).  $^1\text{H}$  NMR (400 MHz,  $\text{CDCl}_3$ )  $\delta$  7.85 (d, 2H,  $J = 8.4$  Hz), 7.35 - 7.40 (m, 5H), 7.16 - 7.25 (m, 4H), 6.98 (d, 2H,  $J = 8.4$  Hz), 6.55 (dt, 1H,  $J = 16.0, 7.2$  Hz), 6.11 (d, 1H,  $J = 16.0$  Hz), 2.50 (s, 3H), 2.37 (s, 3H), 1.94 - 1.99 (m, 2H), 1.12 - 1.21 (m, 2H), 0.63 (t, 3H,  $J = 7.2$  Hz);  $^{13}\text{C}$  NMR (125 MHz,  $\text{CDCl}_3$ )  $\delta$  163.0, 151.7, 144.7, 143.5, 138.8, 138.3, 135.1, 130.3, 129.6, 129.5, 129.4, 129.0, 127.4, 121.8, 101.8, 35.2, 21.9, 21.3, 13.6; IR (neat): 3735, 2960, 1648, 1596, 1560, 1540, 1371, 1155, 1087; MS ( $\text{ES}^+$ ) Calculated for  $[\text{C}_{26}\text{H}_{28}\text{N}_2\text{O}_4\text{S}_2\text{Na}]^+$ : 519.14; Found: 519.13

ORTEP description of E-14j

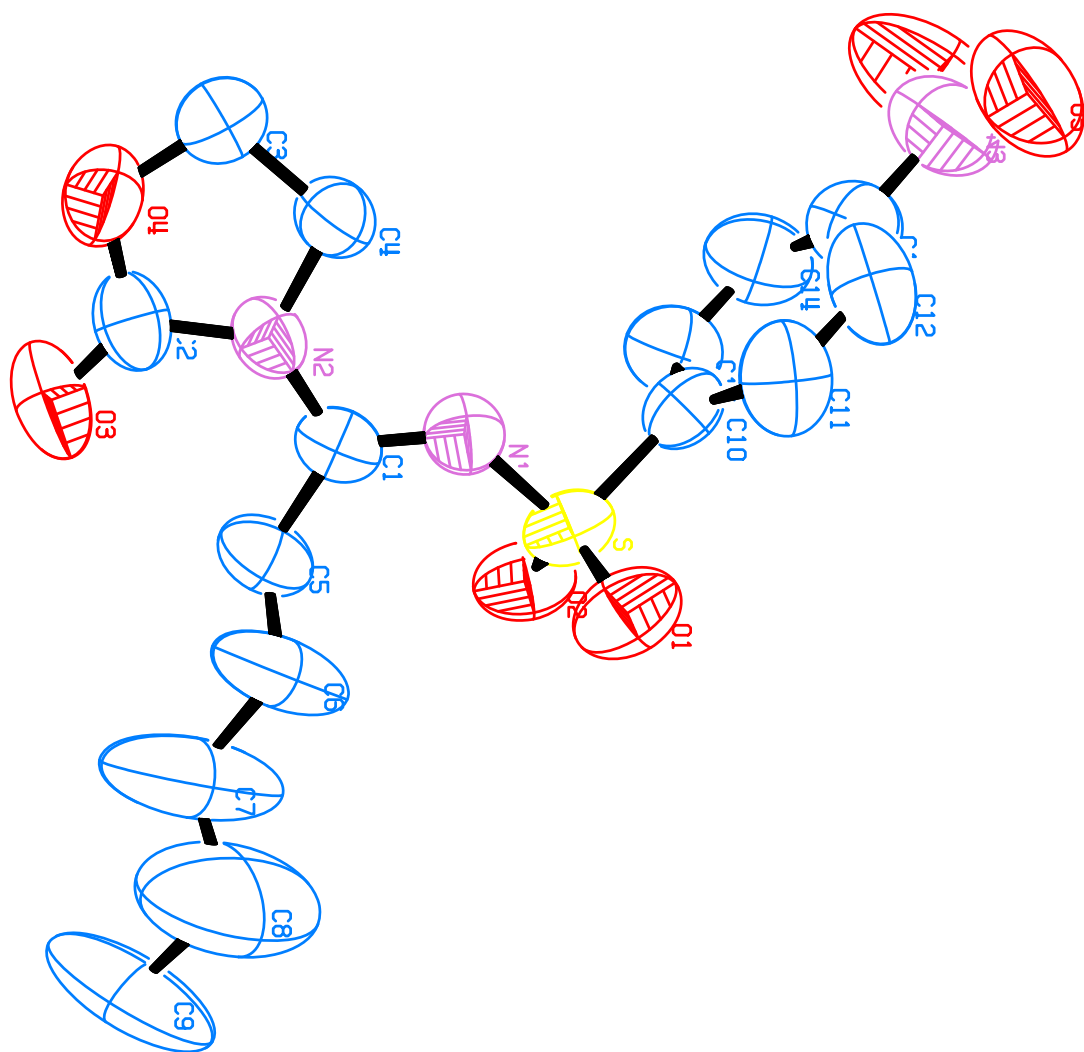

1c92-36  
exp25 szpu1

|             |                |            |         |
|-------------|----------------|------------|---------|
| date        | Aug 19 2010    | dn         | H1      |
| solvent     | cdcl3          | do         | -1425.0 |
| file        | /home/Zhang/Cv | dm         | nmn     |
| q11         | 1c92-36-3.fid  | dmm        | C       |
| ACQUISITION |                | dmf        | 200     |
| sfrq        | 399.951        | PROCESsing | 0.10    |
| tn          | H1             | 1p         | 65536   |
| at          | 2.502          | fn         | F       |
| mp          | 36008          | math       |         |
| sw          | 7190.8         | werr       |         |
| fb          | not used       | wexp       |         |
| bs          | 2              | wbs        |         |
| pw          | 8.0            | wht        |         |
| tpwr        | 57             | sp         | -185.7  |
| d1          | 3.000          | wp         | 3539.3  |
| tof         | -6.9           | vs         | 28      |
| nt          | 10             | sc         | 0       |
| ct          | 10             | WC         | 250     |
| atlock      | gain           | Hzmm       | 14.16   |
| gain        | not used       | IS         | 261.78  |
| fl          | FLAGS          | rfl        | 4501.8  |
| in          | n              | rffp       | 2903.6  |
| dp          | y              | th         | 3       |
| hs          | nn             | ins        | 3.000   |
|             |                | at         | ph      |

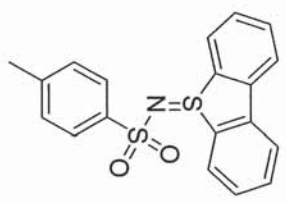

1

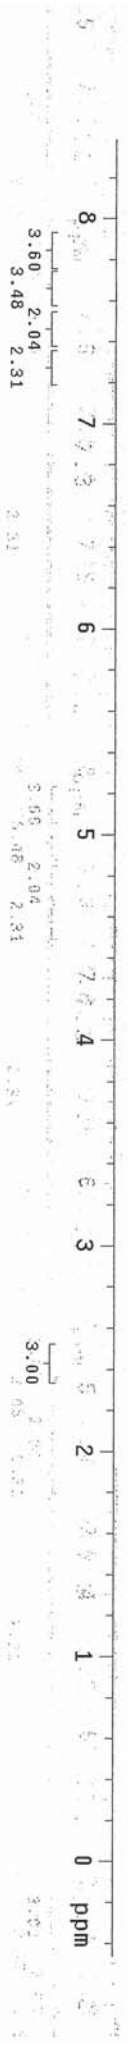

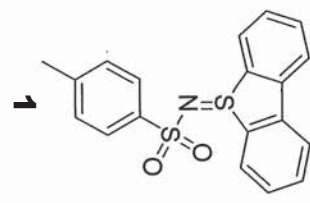

1c43-36-13C  
 exp25 CARBON

|             |         |             |            |              |
|-------------|---------|-------------|------------|--------------|
| SAMPLE      | date    | Dec 17 2010 | temp       | not used     |
| SOLVENT     | solvent | cdcl3       | gain       | 54           |
| FILE        | file    | exp         | spin       | not used     |
| ACQUISITION | sw      | 28258.6     | hst        | 0.008        |
|             | at      | 1.300       | pw90       | 9.200        |
|             | np      | 73498       | a1fa       | 10.000       |
|             | fb      | 16000       | FLAGS      |              |
|             | bs      | 2           | i1         | n            |
|             | d1      | 3.000       | dp         | n            |
|             | nt      | 10000       | hs         | y            |
|             | ct      | 160         | PROCESSING | nm           |
| TRANSMITTER | tn      | G13         | lb         | 0.50         |
|             | sfrq    | 125.702     | tsfid      | 2            |
|             | tof     | 865.4       | fn         | not used     |
|             | tpwr    | 56          | SP         | DISPLAY      |
|             | pw      | 13.500      | wp         | -861.6       |
| DECOUPLER   | dn      | H1          | ffl        | 20075.4      |
|             | dof     | 0           | rfp        | 11036.8      |
|             | dm      | nny         | tp         | 3678.0       |
|             | decwave |             |            | 65.8         |
|             | dpwr    | 36          | WC         | PLOT -1038.9 |
|             | dmf     | 11101       | SC         | 250          |
|             |         |             | VS         | 0            |
|             |         |             | th         | 2141         |
|             |         |             | ai         | cdc ph       |
|             |         |             |            | 4            |

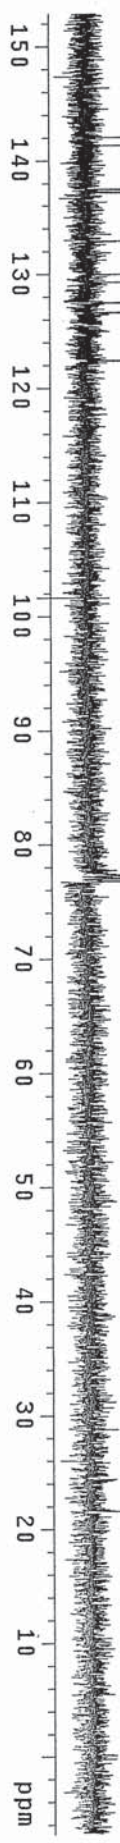

1cq2-76

exp25 s2pul

|             |                |            |         |
|-------------|----------------|------------|---------|
| date        | Aug 31 2010    | dn         | H1      |
| solvent     | cdcl3          | dof        | -1425.0 |
| file        | /home/Zhang/cv | dm         | nm      |
| q1          | 1cq2-76.fid    | dmm        | C       |
| ACQUISITION |                | dmf        | 200     |
| sfrq        | 399.951        | PROCESSING |         |
| tn          | H1             | lb         | 0.10    |
| at          | 2.502          | fn         | 65536   |
| np          | 36008          | math       | f       |
| sw          | 7198.8         |            |         |
| fb          | not used       | weff       |         |
| bs          | 2              | wexp       |         |
| pw          | 8.0            | wbs        |         |
| tpwr        | 57             | wnt        |         |
| d1          | 3.000          | sp         | -94.5   |
| tof         | -6.9           | wp         | 3572.9  |
| nt          | 8              | vs         | 25      |
| ct          | 8              | sc         | 0       |
| alock       | not used       | WC         | 250     |
| gain        | n              | Hzmm       | 14.29   |
| fl          | n              | IS         | 500.00  |
| in          | n              | rfl        | 4508.1  |
| dp          | y              | rfd        | 2908.6  |
| hs          | nm             | ins        | 3       |
| ai          |                | ph         | 3.000   |

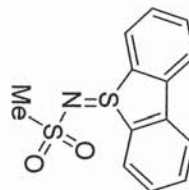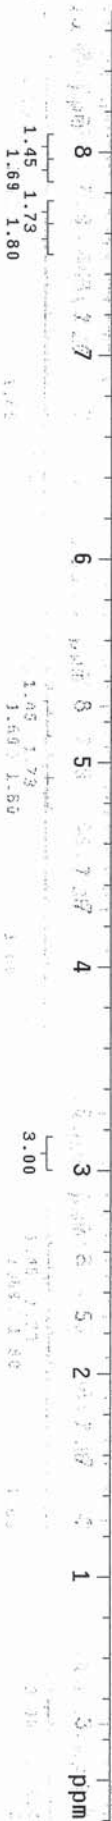



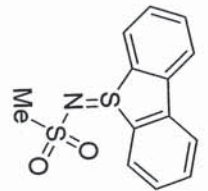

**2**

1c92-76-13C  
 exp25 CARBON

|             |             |            |          |
|-------------|-------------|------------|----------|
| SAMPLE      | Dec 19 2010 | temp       | not used |
| solvent     | cdcl3       | gain       | 54       |
| file        | exp         | spin       | not used |
| ACQUISITION | 28258.6     | hst        | 0.008    |
| sw          | 1.300       | pw90       | 9.200    |
| at          | 1.300       | atfa       | 10.000   |
| np          | 73498       | FLAGS      |          |
| rb          | 16000       | i1         | n        |
| bs          | 2           | in         | n        |
| d1          | 3.000       | dp         | y        |
| nt          | 10000       | hs         | nm       |
| ct          | 210         | PROCESSING |          |
| TRANSMITTER | G13         | lb         | 0.50     |
| tn          | 125.702     | isfid      | 2        |
| sfrq        | 865.4       | fn         | not used |
| tof         | 56          | DISPLAY    |          |
| tpwr        | 13.500      | sp         | -596.0   |
| pw          | 0           | wp         | 21268.1  |
| DECOUPLER   | H1          | rfl        | 11036.3  |
| dn          | 0           | rtp        | 9678.0   |
| dof         | 0           | rp         | 161.2    |
| dm          | nny         | lp         | -891.8   |
| decwave     |             | PLOT       |          |
| dpwr        | 36          | wc         | 250      |
| dmf         | 11101       | sc         | 0        |
|             |             | vs         | 2090     |
|             |             | th         | 8        |
|             |             | ai         | cdc      |
|             |             |            | ph       |

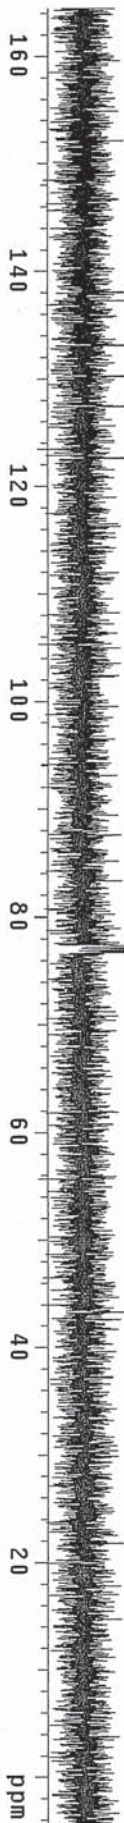

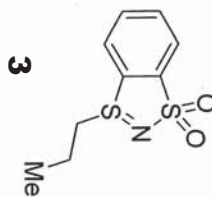

```

1c92-161-H
exp25  PROTON

SAMPLE      PRESATURATION
date       Dec 19 2010      satmode      n
solvent    CDCl3           wet          n
file       exp            SPECIAL      not used
ACQUISITION
sw         7397.6         gain        not used
at         2.049         spin        not used
np         32758         hst         0.008
fb         4000         pw90        9.100
bs         1.000         alfa        6.600
d1         12           FLAGS
d1         12           11          n
nt         12           12          n
ct         12           13          y
TRANSMITTER
tn         H1           hs          nn
sffq      499.859       fn          not used
tof       499.9        PROCESSING
tpwr      53           DISPLAY
pw        4.550       SP         -140.9
dn        C13         WP         4396.6
dof       0           rF1        4632.4
dm        nmh         rFP        3629.0
decbwv   W40_5mm3G1~ 1p          27.9
PLOT
dpwr      47           WC         250
dmf       32258        SC         0
                        VS         30
                        th         3
ai         cdc         ph

```

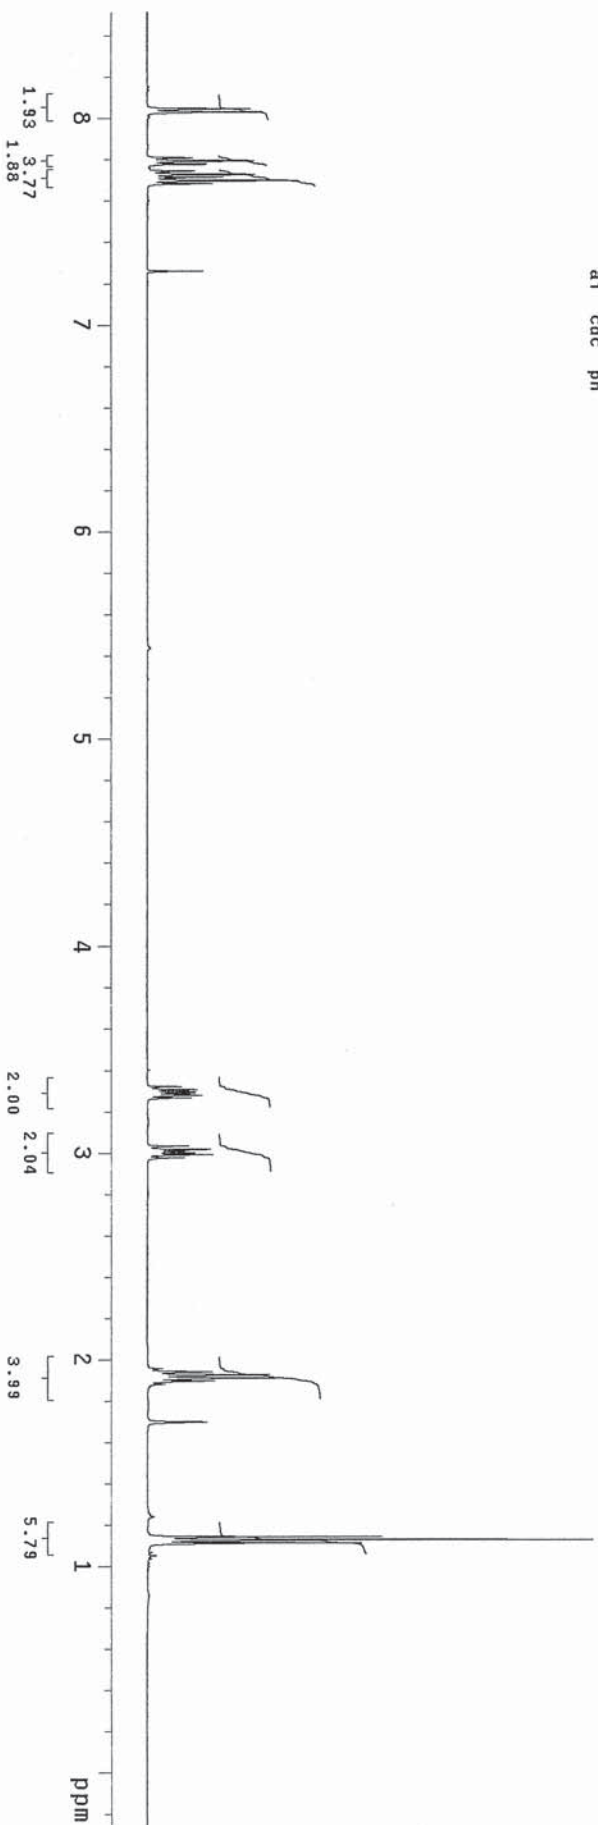

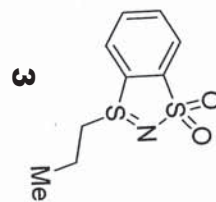

1c92-161-13C  
 exp25 CARBON

|             |             |            |          |
|-------------|-------------|------------|----------|
| SAMPLE      | Dec 19 2010 | temp       | not used |
| solvent     | cdc13       | gain       | 54       |
| file        | exp         | spin       | not used |
| ACQUISITION | 28258.6     | hst        | 0.008    |
| sw          | 1.300       | pw90       | 9.200    |
| at          | 1.300       | atfa       | 10.000   |
| np          | 73498       | FLAGS      |          |
| fb          | 18000       | i1         | n        |
| bs          | 2           | in         | n        |
| d1          | 3.000       | dp         | y        |
| nt          | 10000       | hs         | nm       |
| ct          | 196         | PROCESSING |          |
| TRANSMITTER |             | lb         | 0.50     |
| tn          | G13         | isfid      | 2        |
| sfrq        | 125.702     | fn         | not used |
| tof         | 865.4       | DISPLAY    |          |
| tpwr        | 56          | SP         | -502.0   |
| pw          | 13.500      | wp         | 19443.9  |
| DECOUPLER   | H1          | rfl        | 11041.3  |
| dn          | 0           | rff        | 9678.0   |
| dof         | 0           | rtp        | -179.4   |
| dm          | nny         | lp         | -911.4   |
| decwave     |             | PLOT       |          |
| dpwr        | 36          | wc         | 250      |
| dmf         | 11101       | sc         | 0        |
|             |             | th         | 554      |
|             |             | ai         | 9        |
|             |             | cdc        | ph       |

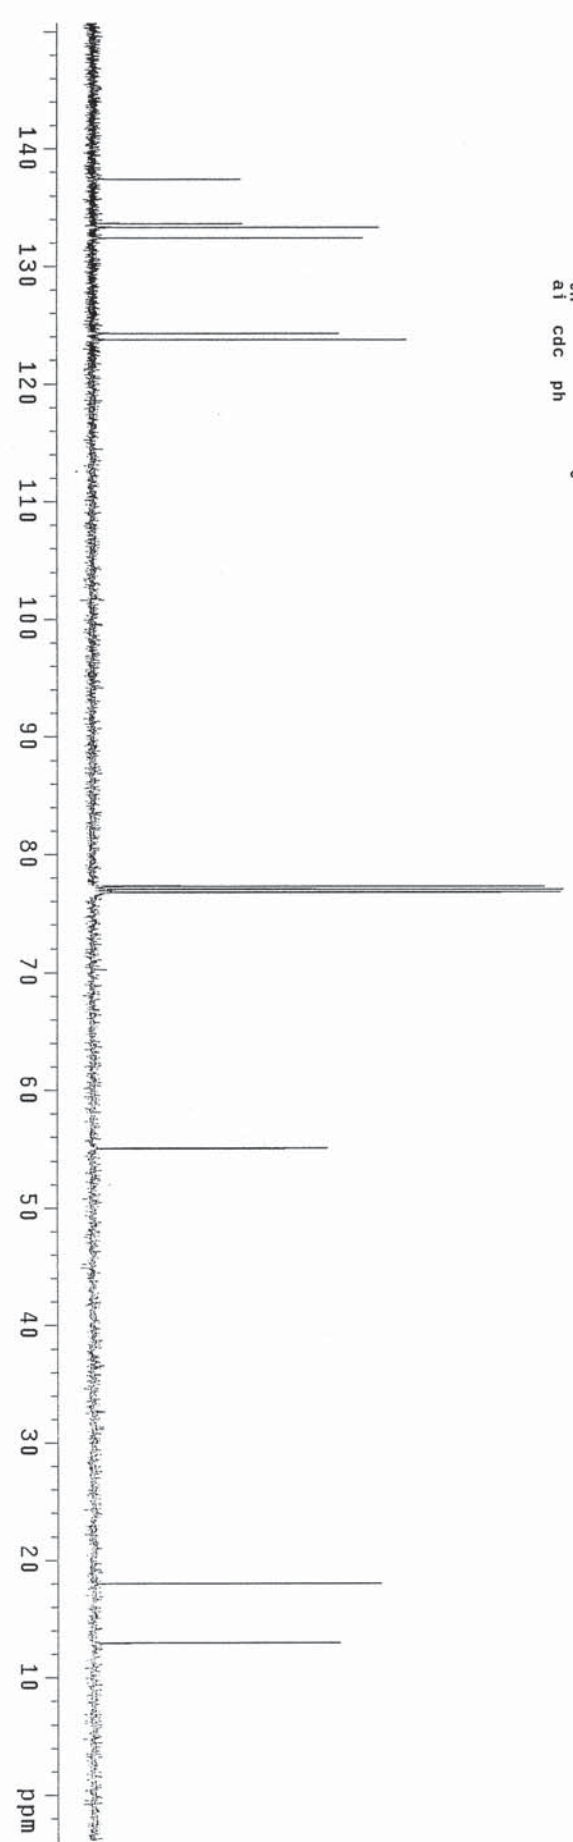

1cq2-37

exp25 s2pul1

|                |                |            |         |
|----------------|----------------|------------|---------|
| SAMPLE         | Aug 19 2010    | dn         | H1      |
| date           | Aug 19 2010    | dof        | -1425.0 |
| solvent        | cdcl3          | dm         | nmn     |
| file           | /home/Zhang/C~ | dmf        | C       |
| q1/1cq2-37.fid |                | dmf        | 200     |
| ACQUISITION    |                | PROCESSING | 0.10    |
| sfrq           | 399.951        | fn         | 65536   |
| tn             | H1             | 1b         |         |
| at             | 2.502          | fn         |         |
| np             | 36008          | math       |         |
| sw             | 7190.8         |            |         |
| fb             | not used       | weff       |         |
| bs             | not used       | wexp       |         |
| pw             | 8.0            | wbs        |         |
| tpwr           | 8.0            | wnt        |         |
| d1             | 3.000          | sp         | -147.7  |
| tof            | -6.9           | wp         | 3581.3  |
| nt             | 10             | vs         | 123     |
| ct             | 8              | sc         | 0       |
| atlock         | not used       | WC         | 250     |
| gain           | n              | Hzmm       | 14.33   |
| fl             | n              | IS         | 500.00  |
| in             | Y              | rfl        | 4502.2  |
| dp             | n              | rtp        | 2903.6  |
| hs             | nm             | th         | 3       |
| ai             | nm             | ins        | 3.000   |

DEC. & VT

|      |        |
|------|--------|
| DISP | 0.10   |
| math | 65536  |
| weff |        |
| wexp |        |
| wbs  |        |
| wnt  |        |
| sp   | -147.7 |
| wp   | 3581.3 |
| vs   | 123    |
| sc   | 0      |
| WC   | 250    |
| Hzmm | 14.33  |
| IS   | 500.00 |
| rfl  | 4502.2 |
| rtp  | 2903.6 |
| th   | 3      |
| ins  | 3.000  |

ph

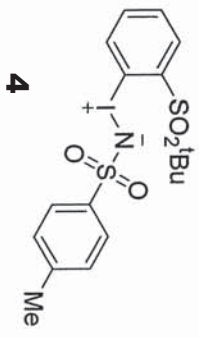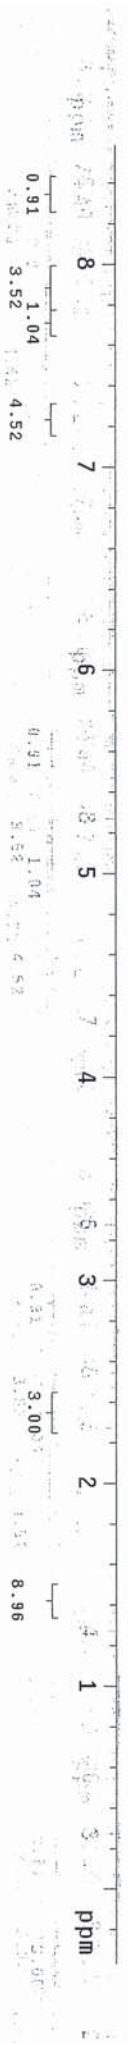

1c42-37-13C  
 exp25 CARBON

|             |             |            |          |
|-------------|-------------|------------|----------|
| SAMPLE      | Dec 17 2010 | temp       | not used |
| SOLVENT     | cdcl3       | gain       | 54       |
| file        | exp         | spin       | not used |
| ACQUISITION | 28258.6     | hst        | 0.008    |
| SW          | 1.300       | PW90       | 9.200    |
| at          | 73498       | atfa       | 10.000   |
| np          | 16000       | FLAGS      |          |
| fb          | 3.000       | l1         | n        |
| bs          | 2           | in         | n        |
| d1          | 10000       | dp         | y        |
| nt          | 266         | hs         | m        |
| ct          |             | PROCESSING |          |
| TRANSMITTER | G13         | lb         | 0.50     |
| tn          | 125.702     | isfid      | 2        |
| sffq        | 865.4       | fn         | not used |
| tof         | 56          | DISPLAY    |          |
| tpwr        | 13.500      | sp         | -944.4   |
| PW          |             | wd         | 21005.3  |
| DECOUPLER   | H1          | RF1        | 11038.3  |
| dn          | 0           | TFP        | 3678.0   |
| dof         | 0           | TP         | -36.1    |
| dm          | nny         | TP         | -833.6   |
| decwave     |             | PLOT       |          |
| dpwr        | 36          | WC         | 250      |
| dmf         | 11101       | SC         | 0        |
|             |             | VS         | 3294     |
|             |             | th         | 5        |
|             |             | ai         | cdc ph   |

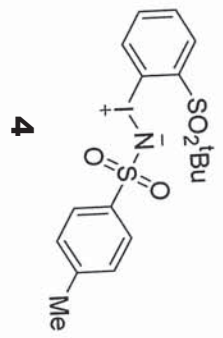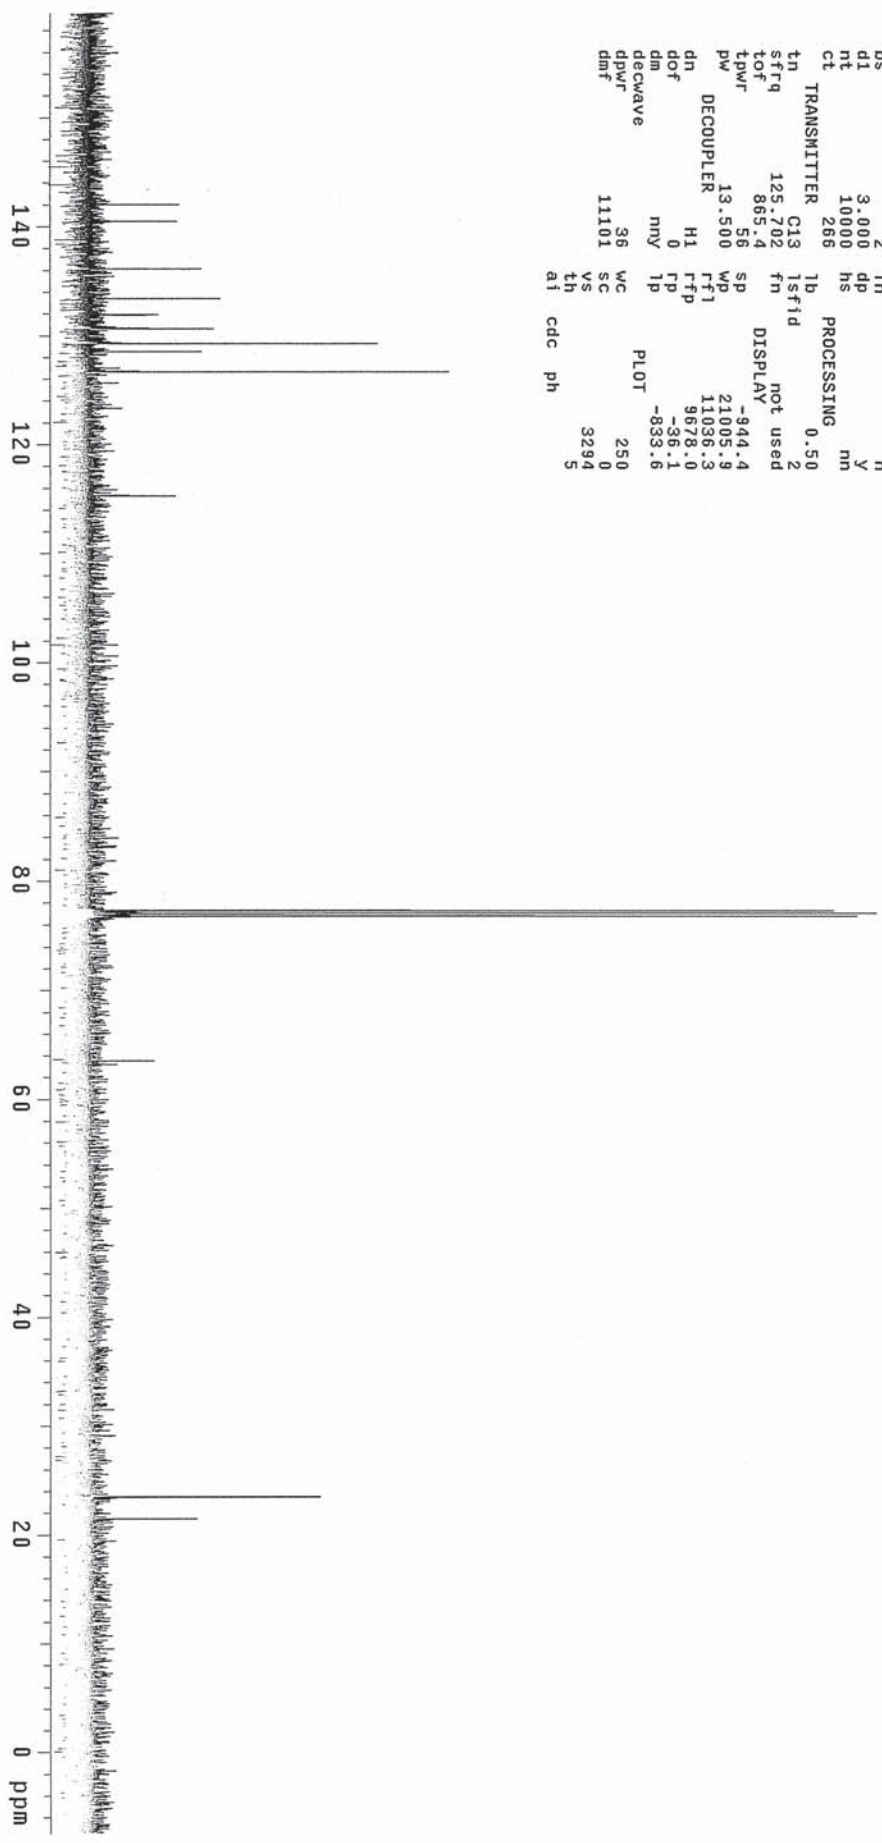

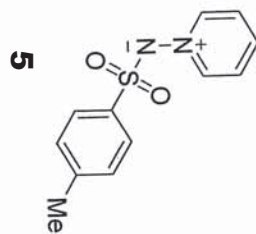

1cq2-114-1  
exp25 s2pul

|                    |                |      |         |            |       |
|--------------------|----------------|------|---------|------------|-------|
| SAMPLE             | date           | 16   | 2010    | dn         | H1    |
| solvent            | cdcl3          | dm   | -1425.0 | dof        |       |
| file               | /home/Zhang/cw | dm   | nmn     | dm         |       |
| q11/1cq2-114-1.fid | dmf            | dmf  | C       | dmf        |       |
| ACQUISITION        |                |      | 200     |            |       |
| sfrq               | 399.951        | H1   | 1b      | PROCESSING | 0.10  |
| tn                 |                |      | fn      |            | 65536 |
| at                 | 2.502          | math |         |            | f     |
| np                 | 36008          |      |         |            |       |
| sw                 | 7196.8         |      |         |            |       |
| fb                 | not used       |      |         |            |       |
| bs                 | 2              | weff |         |            |       |
| pw                 | 8.0            | wbs  |         |            |       |
| tpwr               | 8.0            | wnt  |         |            |       |
| d1                 | 3.000          | sp   | DISPLAY |            |       |
| tof                | -6.9           | wp   | -77.0   |            |       |
| nt                 | 10             | vs   | 3766.4  |            |       |
| ct                 | 10             | sc   | 44      |            |       |
| alock              | n              | WC   | 0       |            |       |
| gain               | not used       | h2mm | 250     |            |       |
| fl                 | FLAGS          | ts   | 15.07   |            |       |
| fn                 | n              | ft1  | 471.54  |            |       |
| dp                 | y              | rtf  | 4502.4  |            |       |
| hs                 | nm             | th   | 2903.6  |            |       |
|                    |                | ins  | 3       |            |       |
|                    |                | ai   | 3.000   |            |       |
|                    |                |      | ph      |            |       |

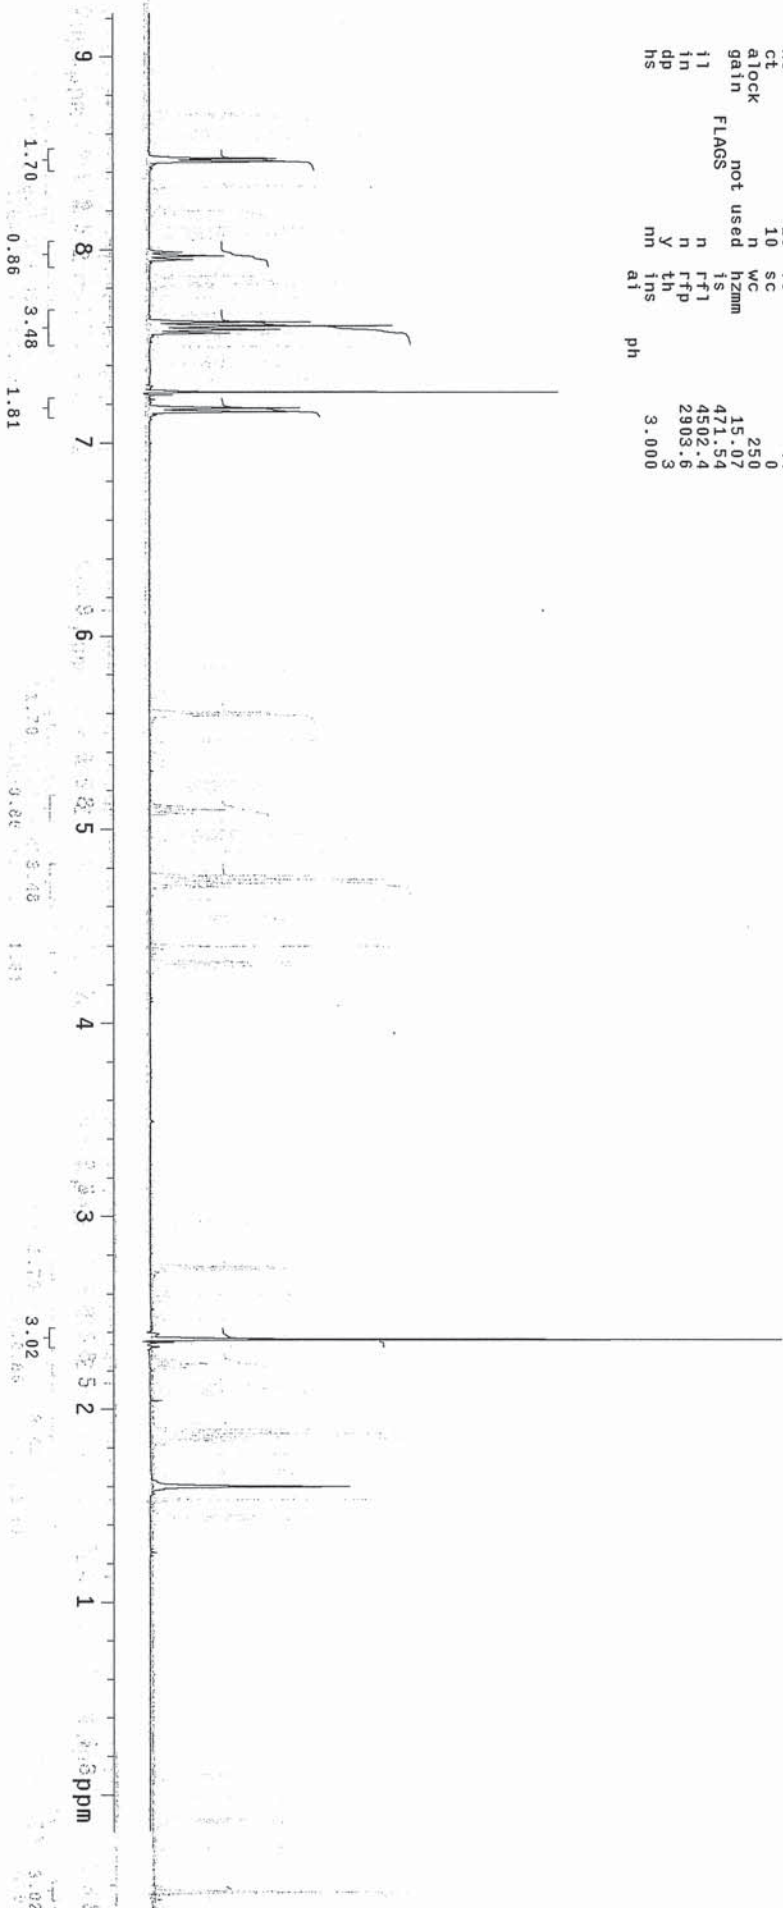

1c92-114-13C  
exp25 CARBON

|         |             |         |            |          |
|---------|-------------|---------|------------|----------|
| date    | Dec 17 2010 | SAMPLE  | temp       | not used |
| solvent | cdc13       | solvent | gain       | 54       |
| file    | exp         | exp     | spin       | not used |
| sw      | 28258.6     | sw      | hst        | 0.008    |
| at      | 1.300       | at      | pw90       | 9.200    |
| np      | 73498       | np      | a1fa       | 10.000   |
| fb      | 16000       | fb      | flags      |          |
| bs      | 3.000       | bs      | in         | n        |
| di      | 10000       | di      | dp         | y        |
| nt      | 10000       | nt      | hs         | nm       |
| ct      | 826         | ct      | PROCESSING | 0.50     |
| tn      | C13         | tn      | lb         | 1s'fid   |
| sfrq    | 125.702     | sfrq    | fn         | not used |
| tof     | 865.4       | tof     | DISPLAY    |          |
| tpwr    | 56          | tpwr    | sp         | -462.7   |
| pw      | 13.500      | pw      | wd         | 20307.4  |
| dn      | H1          | dn      | rfl        | 11035.5  |
| dof     | 0           | dof     | rfl        | 9878.0   |
| dm      | nny         | dm      | tp         | 38.2     |
| decwave | 0           | decwave | lp         | -1008.5  |
| dpwr    | 36          | dpwr    | PLOT       |          |
| dmf     | 11101       | dmf     | wc         | 250      |
|         |             |         | sc         | 0        |
|         |             |         | vs         | 1908     |
|         |             |         | th         |          |
|         |             |         | ai         | cdc ph   |
|         |             |         |            | 2        |

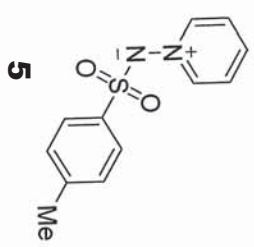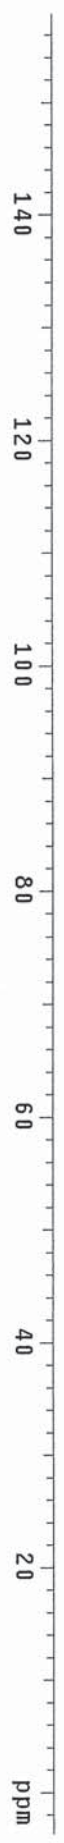

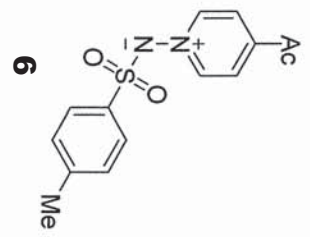

1c92-215-H  
exp25 s2pul

|             |             |      |         |
|-------------|-------------|------|---------|
| SAMPLE      | Dec 31 2010 | DN   | H1      |
| date        | Dec 31 2010 | dof  | -1425.0 |
| solvent     | cdcl3       | dm   | mm      |
| file        | exp         | dmm  | C       |
| ACQUISITION |             | dmf  | 200     |
| sfrq        | 399.951     | H1   |         |
| tn          | H1          | 1b   |         |
| at          | 2.502       | fn   | 0.10    |
| np          | 36008       | math | 65536   |
| sw          | 7196.8      |      | f       |
| fb          | not used    |      |         |
| bs          | 2           | weff |         |
| pw          | 8.0         | wexp |         |
| tpwr        | 8.0         | wbs  |         |
| di          | 57          | wnt  |         |
| tof         | 3.000       | sp   | -61.6   |
| nt          | -6.9        | wp   | 3808.4  |
| ct          | 16          | vs   | 54      |
| alock       | n           | sc   | 0       |
| gain        | not used    | wc   | 250     |
| fl          | FLAGS       | h2mm | 15.23   |
| in          | n           | is   | 257.71  |
| dp          | Y           | ft1  | 4504.0  |
| hs          | nn          | ftp  | 2903.6  |
|             |             | th   | 3       |
|             |             | ins  | 3.000   |
|             |             | ai   |         |

DEC. & VT

PROCESSING

DISPLAY

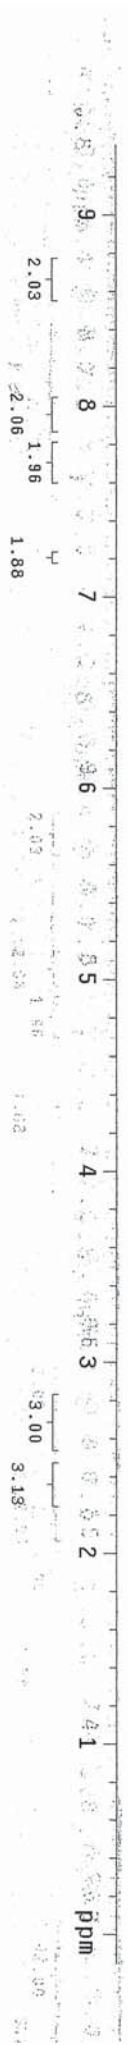



1c42-115-13C  
exp25 CARBON

|             |             |            |          |
|-------------|-------------|------------|----------|
| SAMPLE      | Dec 17 2010 | temp       | not used |
| solvent     | cdc13       | gain       | 54       |
| file        | exp         | spin       | not used |
| ACQUISITION | 28258.6     | hst        | 0.008    |
| sw          | 1.300       | pw90       | 9.200    |
| at          | 73498       | a1fa       | 10.000   |
| np          | 16000       | flags      |          |
| fb          | 16000       | i1         | n        |
| bs          | 3.000       | in         | n        |
| d1          | 10000       | dp         | y        |
| nt          | 10000       | hs         | m        |
| ct          | 448         | PROCESSING | 0.50     |
| TRANSMITTER |             | 1b         | 2        |
| tn          | C13         | 1sfid      | not used |
| sffq        | 125.702     | fn         | not used |
| lof         | 865.4       | DISPLAY    |          |
| lpwr        | 56          | sp         | -1326.0  |
| pw          | 13.500      | wd         | 28258.1  |
| DECOUPLER   | H1          | rfl        | 11004.4  |
| dn          | 0           | tfp        | 9878.0   |
| dof         | 0           | tp         | 3.2      |
| dm          | nny         | 1p         | -928.2   |
| decwave     |             | PLOT       |          |
| dpwr        | 36          | wc         | 250      |
| dmf         | 11101       | sc         | 0        |
|             |             | vs         | 2770     |
|             |             | th         | 0        |
|             |             | ai         | cdc ph   |

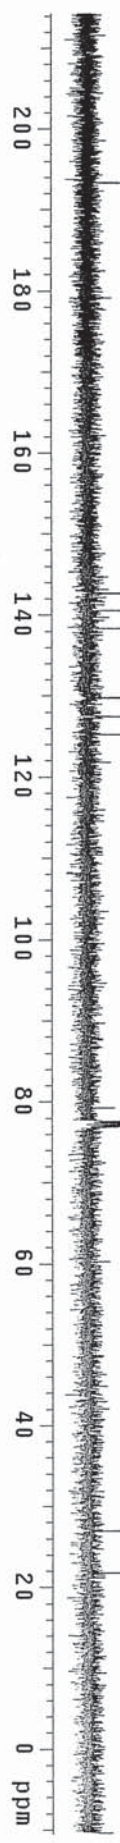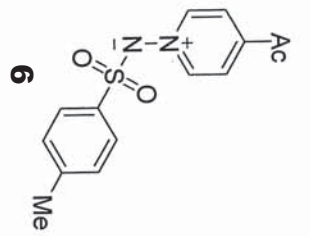

1c92-226

exp25 s2pu1

|             |                |            |         |           |    |
|-------------|----------------|------------|---------|-----------|----|
| date        | Oct 20 2010    | dn         | H1      | DEC. & VT | H1 |
| solvent     | cdcl3          | dof        | -1425.0 |           |    |
| file        | /home/Zhang/cv | dm         | nm      |           |    |
| q11         | 1c92-226.fid   | dmm        | C       |           |    |
| ACQUISITION |                | dmf        | 200     |           |    |
| sfrq        | 399.951        | PROCESSING | 0.10    |           |    |
| tn          | H1             | lb         | 65536   |           |    |
| at          | 2.502          | fn         | f       |           |    |
| np          | 36008          | math       |         |           |    |
| sw          | 7196.8         |            |         |           |    |
| fb          | not used       | weff       |         |           |    |
| bs          | not used       | wekp       |         |           |    |
| pw          | 8.0            | wds        |         |           |    |
| pt          | 8.0            | wnt        |         |           |    |
| tpwr        | 57             | DISPLAY    |         |           |    |
| d1          | 3.000          | sp         | -144.0  |           |    |
| tof         | -6.9           | wp         | 3808.4  |           |    |
| nt          | 16             | vs         | 56      |           |    |
| ct          | 14             | sc         | 0       |           |    |
| alock       | n              | wc         | 250     |           |    |
| gain        | not used       | h2mm       | 15.23   |           |    |
| fl          | n              | is         | 384.32  |           |    |
| in          | n              | ft1        | 4502.2  |           |    |
| dp          | y              | th         | 2903.6  |           |    |
| hs          | nm             | ins        | 2       |           |    |
| ai          | ph             |            | 3.000   |           |    |

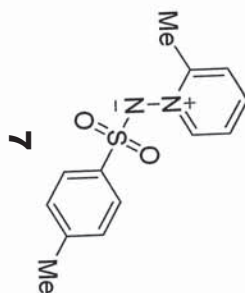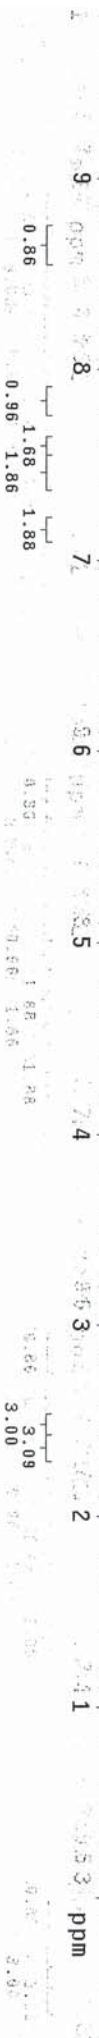

1c42-225-13C  
 exp25 CARBON

|             |             |            |          |
|-------------|-------------|------------|----------|
| SAMPLE      | Dec 17 2010 | temp       | not used |
| solvent     | cdc13       | gain       | 54       |
| file        | exp         | sp1n       | not used |
| ACQUISITION | 28258.6     | hst        | 0.008    |
| sw          | 1.300       | pw90       | 9.200    |
| at          | 73498       | alfa       | 10.000   |
| np          | 16000       | flags      | n        |
| fb          | 2           | il         | n        |
| bs          | 3.000       | in         | y        |
| d1          | 10000       | dp         | n        |
| nl          | 234         | hs         | nm       |
| ct          | TRANSMITTER | PROCESSING | 0.50     |
| tn          | C13         | lb         | 2        |
| sffq        | 125.702     | tsfid      | not used |
| lof         | 865.4       | fn         | DISPLAY  |
| lpwr        | 56          | sp         | -365.7   |
| pw          | 13.500      | wd         | 21632.4  |
| DECOUPLER   | H1          | rf1        | 11037.6  |
| dn          | 0           | fp         | 9878.0   |
| dof         | 0           | tp         | 8.3      |
| dm          | nmv         | ip         | -920.3   |
| deccwave    |             | PLOT       | 250      |
| dpwr        | 36          | wc         | 0        |
| dmf         | 11101       | sc         | 0        |
|             |             | vs         | 2141     |
|             |             | th         | 4        |
|             |             | ai         | cdc ph   |

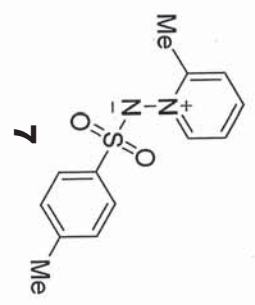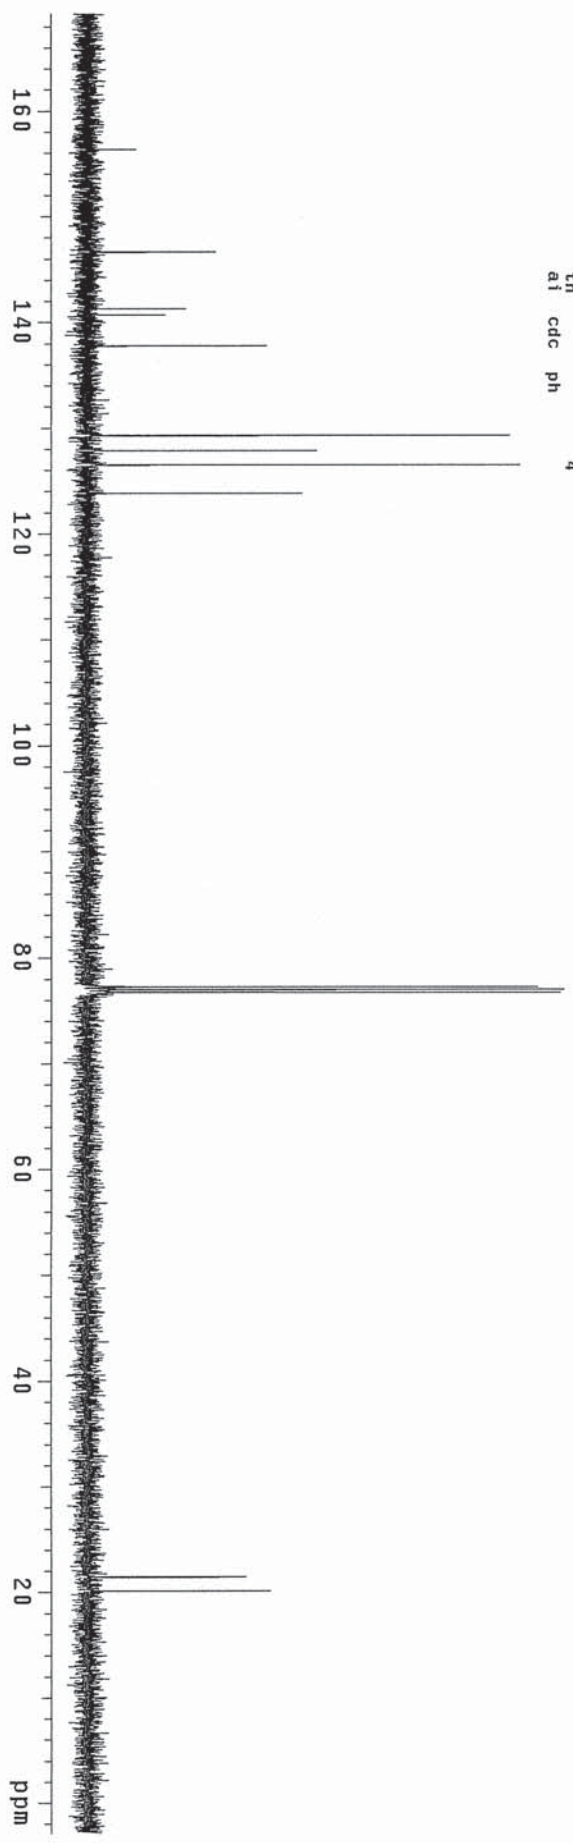

1c92-284-H

exp2 PROTON

SAMPLE PRESATURATION  
date Dec 5 2010 satmode n  
solvent CDC13 wet n  
file CDC13 exp SPECIAL  
ACQUISITION temp not used  
sw 7997.6 gain not used  
at 2.049 spin not used  
np 32768 hst 0.008  
fb 4000 pw90 9.100  
bs 2 atfa 6.600  
d1 1.000 FLAGS  
d1 10 i1 n  
nt 10 in n  
ct 10 dp y  
TRANSMITTER H1 hs nm  
tn 499.859 fn PROCESSING  
sfrq 499.9 not used  
tof 53 DISPLAY  
tpwr 4.550 sp 56.8  
pw DECOUPLER C13 WP 4612.4  
dn C13 TFI 4831.9  
dof 0 TFP 3629.0  
dm nmh b1.5  
decwave W40\_5mm3G1~ 1p 3.8  
PLOT  
dpwr 47 WC 250  
dmf 32258 VS 0  
ai cdc ph th 42  
6

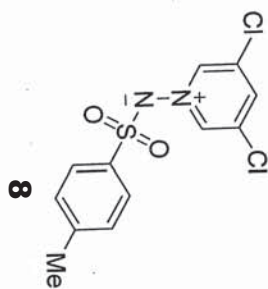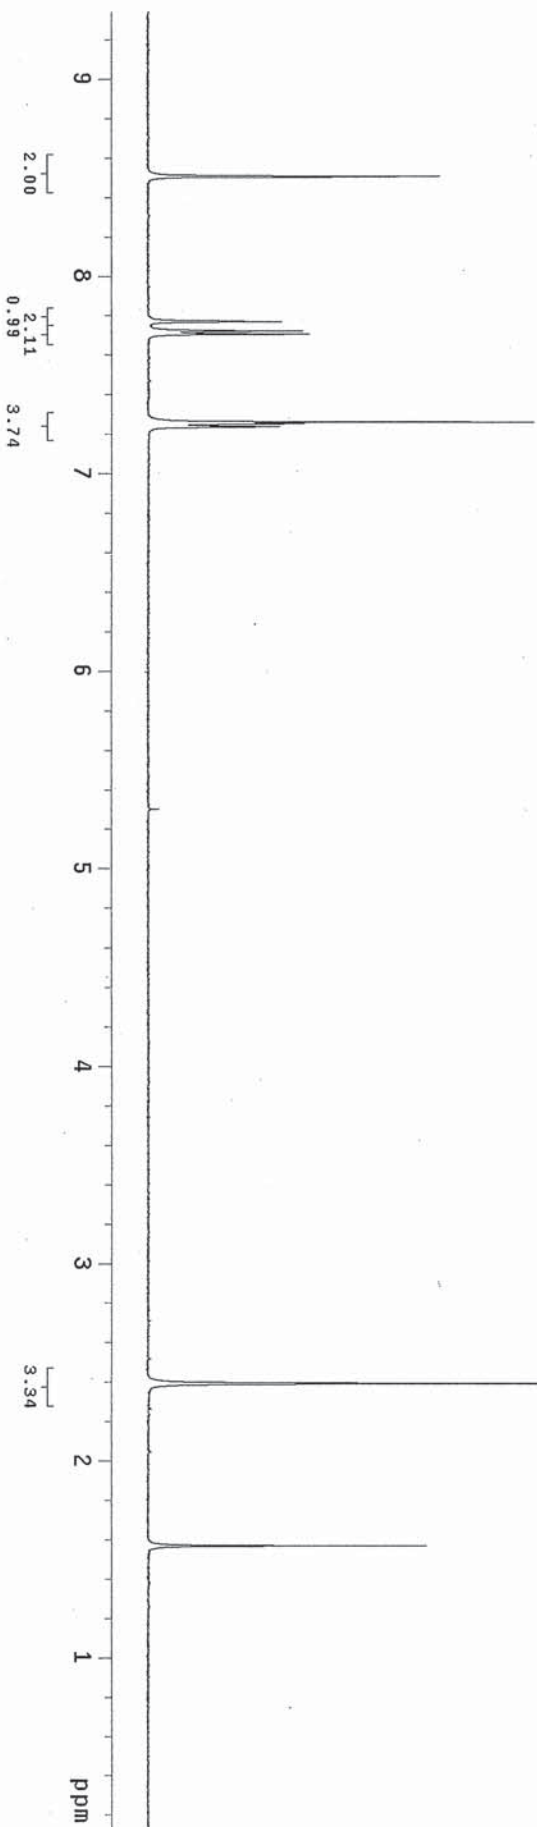

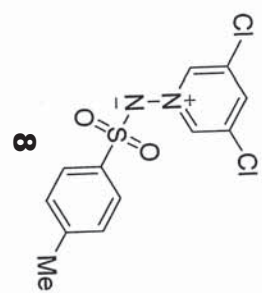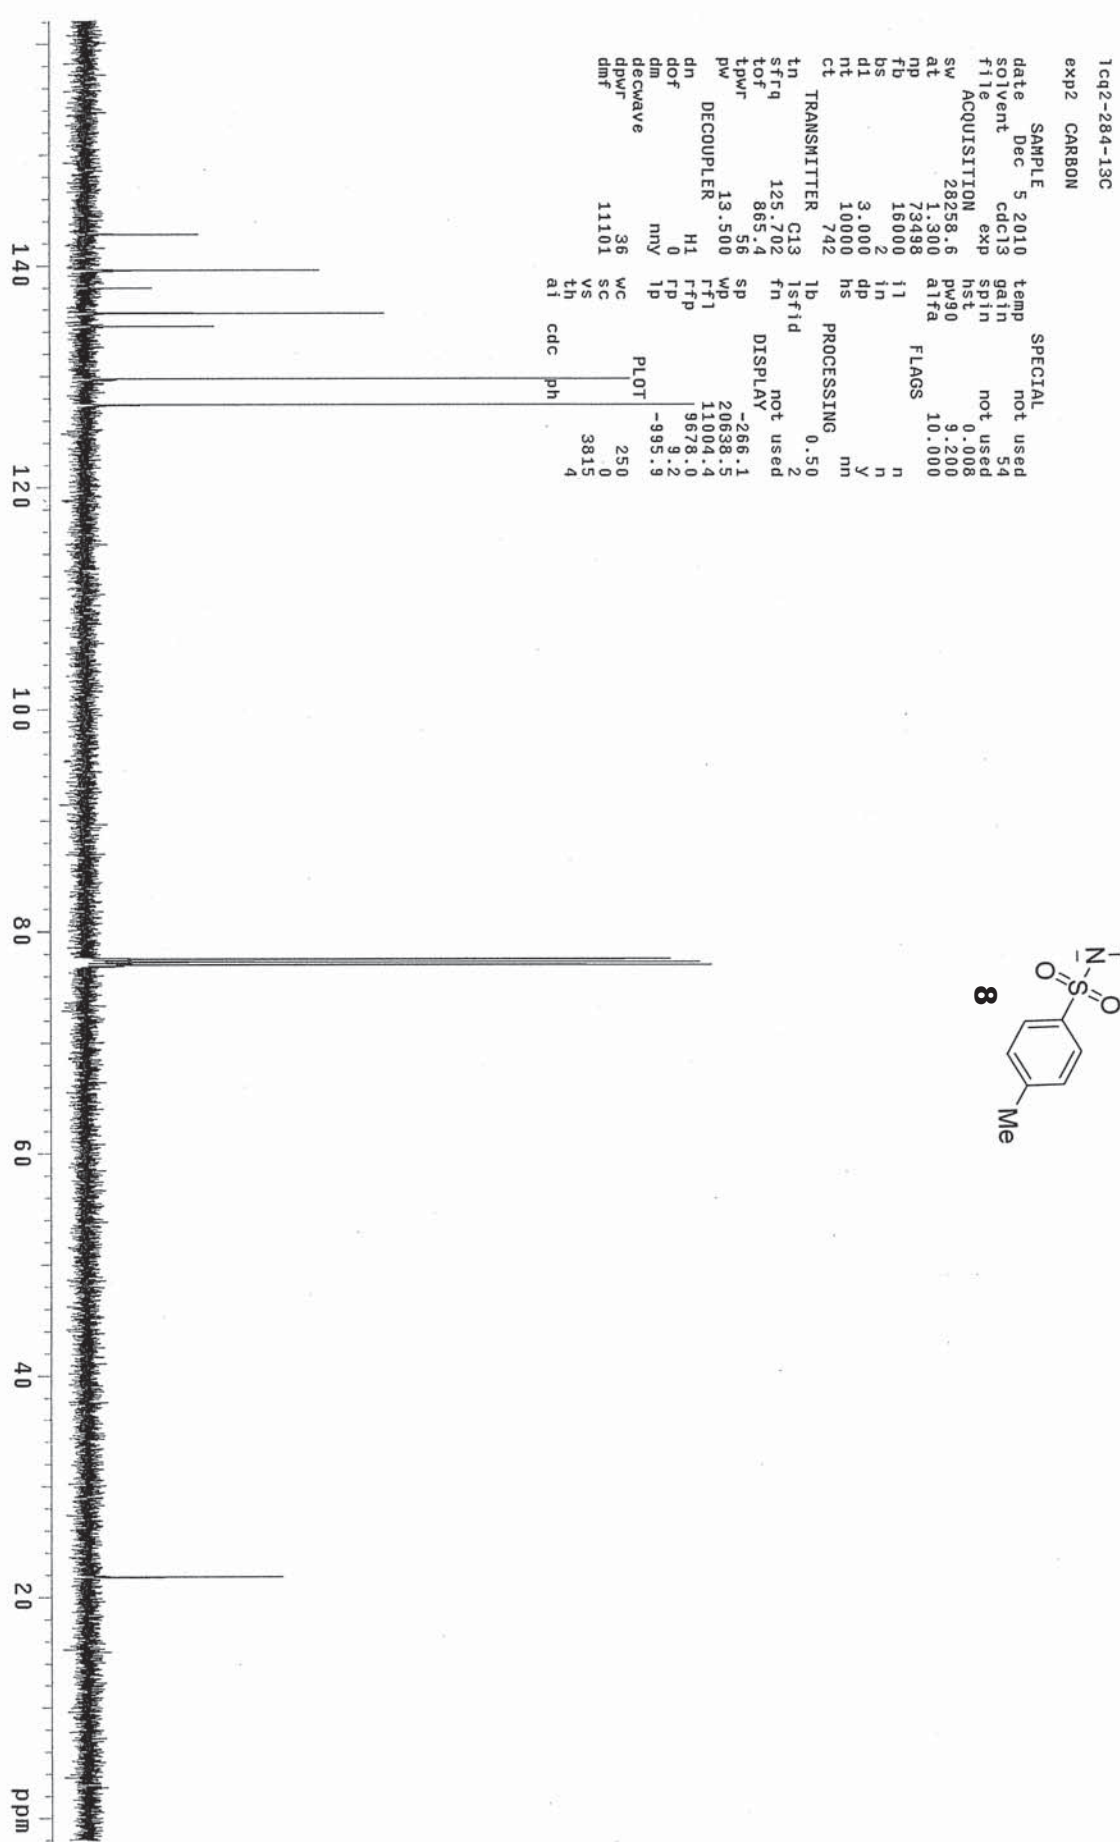

1cq3-120-H

exp25 PROTON

|             |             |               |          |
|-------------|-------------|---------------|----------|
| SAMPLE      | Dec 24 2010 | PRESATURATION | n        |
| date        | Dec 24 2010 | satmode       | n        |
| solvent     | CDCl3       | wet           | n        |
| file        | exp         | SPECIAL       |          |
| ACQUISITION |             | temp          | not used |
| sw          | 7997.6      | gain          | not used |
| at          | 2.049       | spin          | not used |
| np          | 32768       | hst           | 0.008    |
| fb          | 4000        | PW90          | 9.100    |
| bs          | 2           | alfa          | 6.600    |
| dl          | 1.000       | FLAGS         |          |
| nl          | 16          | i1            | n        |
| ct          | 16          | in            | n        |
| TRANSMITTER | H1          | dp            | y        |
| tn          | 499.859     | hs            | nm       |
| sfrq        | 499.9       | fn            | not used |
| tof         | 53          | DISPLAY       |          |
| tpwr        | 4.550       | SP            | -103.8   |
| DECOUPLER   | C13         | WP            | 4621.7   |
| dn          | 0           | FF1           | 4632.9   |
| dof         | 0           | TFP           | 3829.0   |
| dm          | nmn         | TP            | 179.4    |
| decwave     | W40_5mm3Q1~ | IP            | 3.4      |
| dpwr        | 47          | PLOT          |          |
| dmf         | 32258       | wc            | 250      |
|             |             | sc            | 0        |
|             |             | vs            | 25       |
|             |             | th            | 3        |
|             |             | ai            | cdc      |
|             |             |               | ph       |

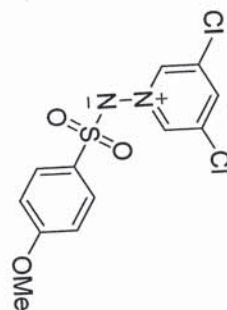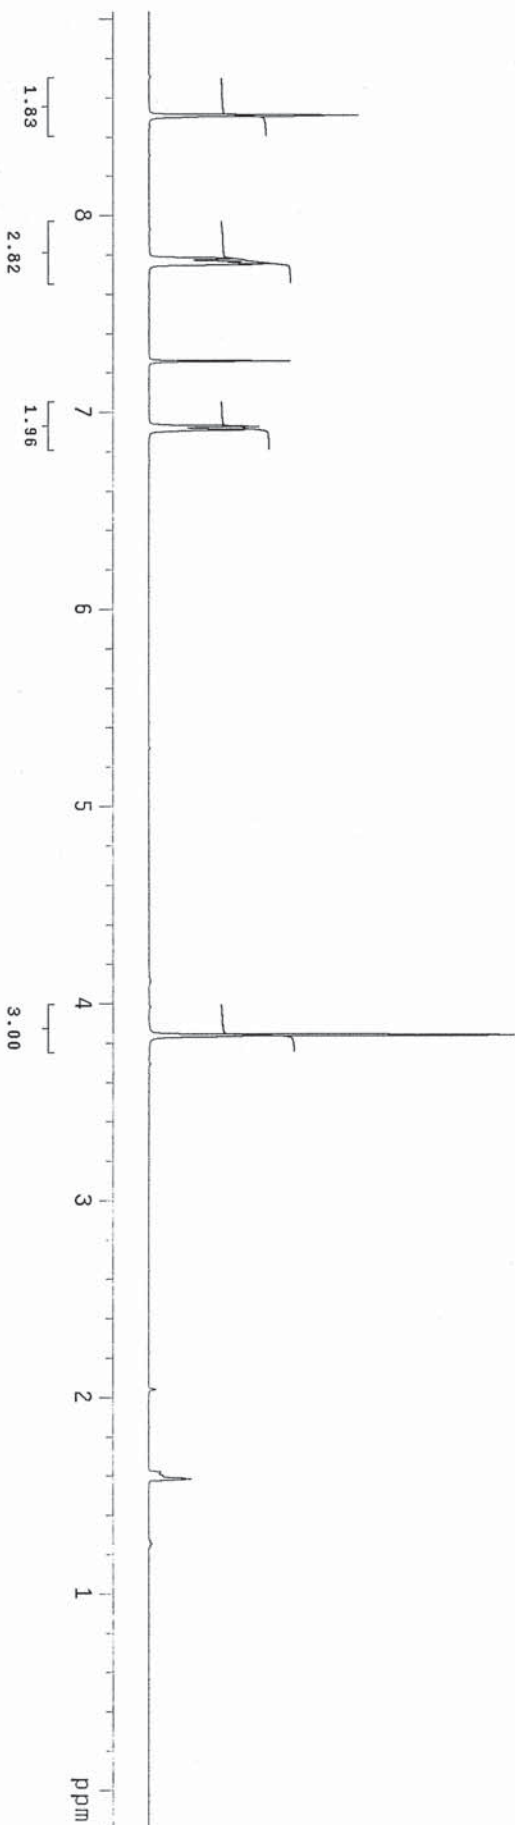

1c93-120-13C  
exp25 CARBON

|             |             |            |          |
|-------------|-------------|------------|----------|
| SAMPLE      | Dec 24 2010 | temp       | not used |
| date        | Dec 24 2010 | gain       | 54       |
| solvent     | cdc13       | sp1n       | not used |
| file        | exp         | hst        | 0.008    |
| ACQUISITION | 28258.6     | pw90       | 9.200    |
| sw          | 1.300       | alfa       | 10.000   |
| at          | 73498       | flags      |          |
| np          | 16000       | i1         | n        |
| fb          | 3.000       | i2         | y        |
| d1          | 10000       | dp         | n        |
| nt          | 334         | hs         | m        |
| ct          | 334         | PROCESSING |          |
| TRANSMITTER | G13         | lb         | 0.50     |
| tn          | 125.702     | tsfid      | 2        |
| sfrq        | 865.4       | fn         | not used |
| lof         | 56          | DISPLAY    |          |
| lpwr        | 13.500      | sp         | -960.7   |
| pw          | 0           | wp         | 23719.4  |
| DECOUPLER   | H1          | rf1        | 11003.6  |
| dn          | 0           | rfp        | 9678.0   |
| dof         | 0           | tp         | 43.6     |
| dm          | my          | ip         | -980.9   |
| decwave     | 36          | PLOT       | 250      |
| dpwr        | 11101       | wc         | 0        |
| dmf         |             | sc         | 0        |
|             |             | vs         | 2297     |
|             |             | th         | 4        |
|             |             | ai         | cdc ph   |

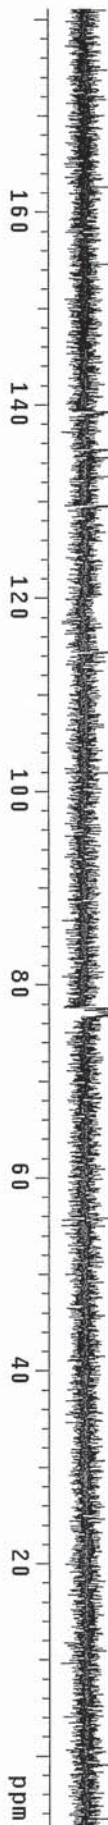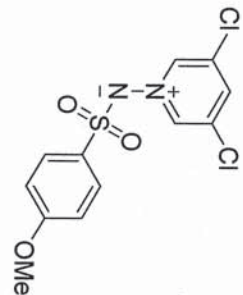

1c92-233-H  
 exp2 PROTON

|         |             |             |             |       |          |   |
|---------|-------------|-------------|-------------|-------|----------|---|
| date    | Dec 5 2010  | SAMPLE      | 5           | 2010  | satmode  | n |
| solvent | CDCl3       | SOLVENT     | CDCl3       |       | wet      | n |
| file    | exp         | FILE        | exp         |       | SPECIAL  | n |
| sw      | 7997.6      | ACQUISITION | 7997.6      | temp  | not used |   |
| at      | 2.049       | gain        | 2.049       | spin  | not used |   |
| np      | 32758       | hst         | 32758       | pw90  | 0.008    |   |
| fb      | 4000        | pw90        | 4000        | atfa  | 9.100    |   |
| bs      | 2           | atfa        | 2           | flags | 8.600    |   |
| di      | 1.000       | flags       | 1.000       |       |          |   |
| nt      | 10          |             | 10          |       |          |   |
| ct      | 10          |             | 10          |       |          |   |
| tn      | H1          | TRANSMITTER | H1          | hs    | nm       |   |
| sfrq    | 499.859     | fn          | 499.859     | dp    | nm       |   |
| tof     | 499.9       | PROCESSING  | 499.9       |       | not used |   |
| tpwr    | 53          | DISPLAY     | 53          |       | not used |   |
| pw      | 4.550       | SP          | 4.550       |       | -83.8    |   |
| dn      | C13         | WP          | C13         |       | 4563.5   |   |
| dof     | 0           | FT1         | 0           |       | 4831.9   |   |
| dm      | nm          | FTP         | nm          |       | 3629.0   |   |
| decwave | W40_5mm3G1~ | TP          | W40_5mm3G1~ |       | 64.6     |   |
| dpwr    | 47          | PLOT        | 47          |       | -3.5     |   |
| dmf     | 32258       | WC          | 32258       |       | 250      |   |
|         |             | SC          |             |       | 0        |   |
|         |             | VS          |             |       | 42       |   |
|         |             | th          |             |       | 4        |   |
|         |             | ai          |             |       | cdc      |   |
|         |             |             |             |       | ph       |   |

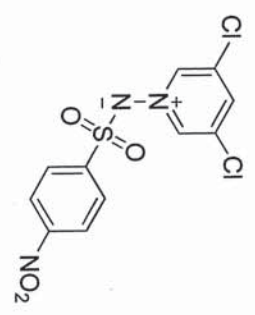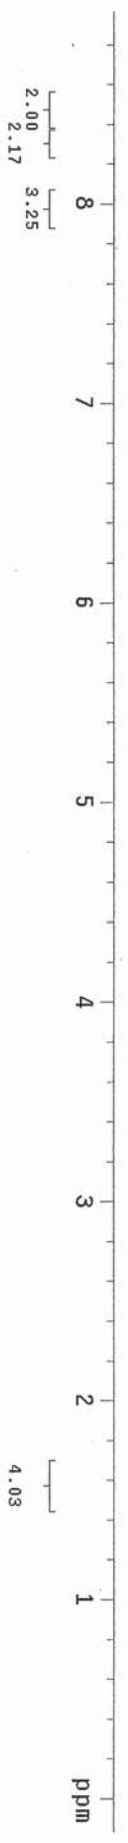



1c42-233-13C  
 exp2 CARBON

|             |            |            |          |
|-------------|------------|------------|----------|
| date        | Dec 5 2010 | temp       | not used |
| solvent     | cdc13      | gain       | 54       |
| file        | exp        | spin       | not used |
| ACQUISITION | 28258.6    | hst        | 0.008    |
| sw          | 1.300      | pw90       | 9.200    |
| at          | 73498      | atfa       | 10.000   |
| np          | 16000      | flags      |          |
| fb          | 2          | in         | n        |
| bs          | 3.000      | dp         | n        |
| dl          | 10000      | hs         | y        |
| nt          | 1032       | hs         | nm       |
| ct          |            | PROCESSING | 0.50     |
| tn          | C13        | lb         | 2        |
| sfrq        | 125.702    | lsfid      | not used |
| tof         | 865.4      | fn         | not used |
| tpwr        | 56         | SP         | -296.7   |
| pw          | 13.500     | WD         | 20638.5  |
| DECOUPLER   | H1         | RF1        | 11035.1  |
| dn          | 0          | FFP        | 9678.0   |
| dof         | 0          | TP         | 48.8     |
| dm          | nny        | IP         | -1086.1  |
| decwave     |            | PLOT       |          |
| dpwr        | 36         | WC         | 250      |
| dmf         | 11101      | SC         | 0        |
|             |            | VS         | 3815     |
|             |            | TH         | 0        |
|             |            | AI         | 3        |
|             |            | cdc        | ph       |

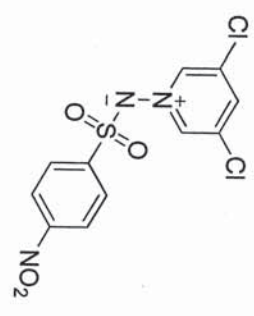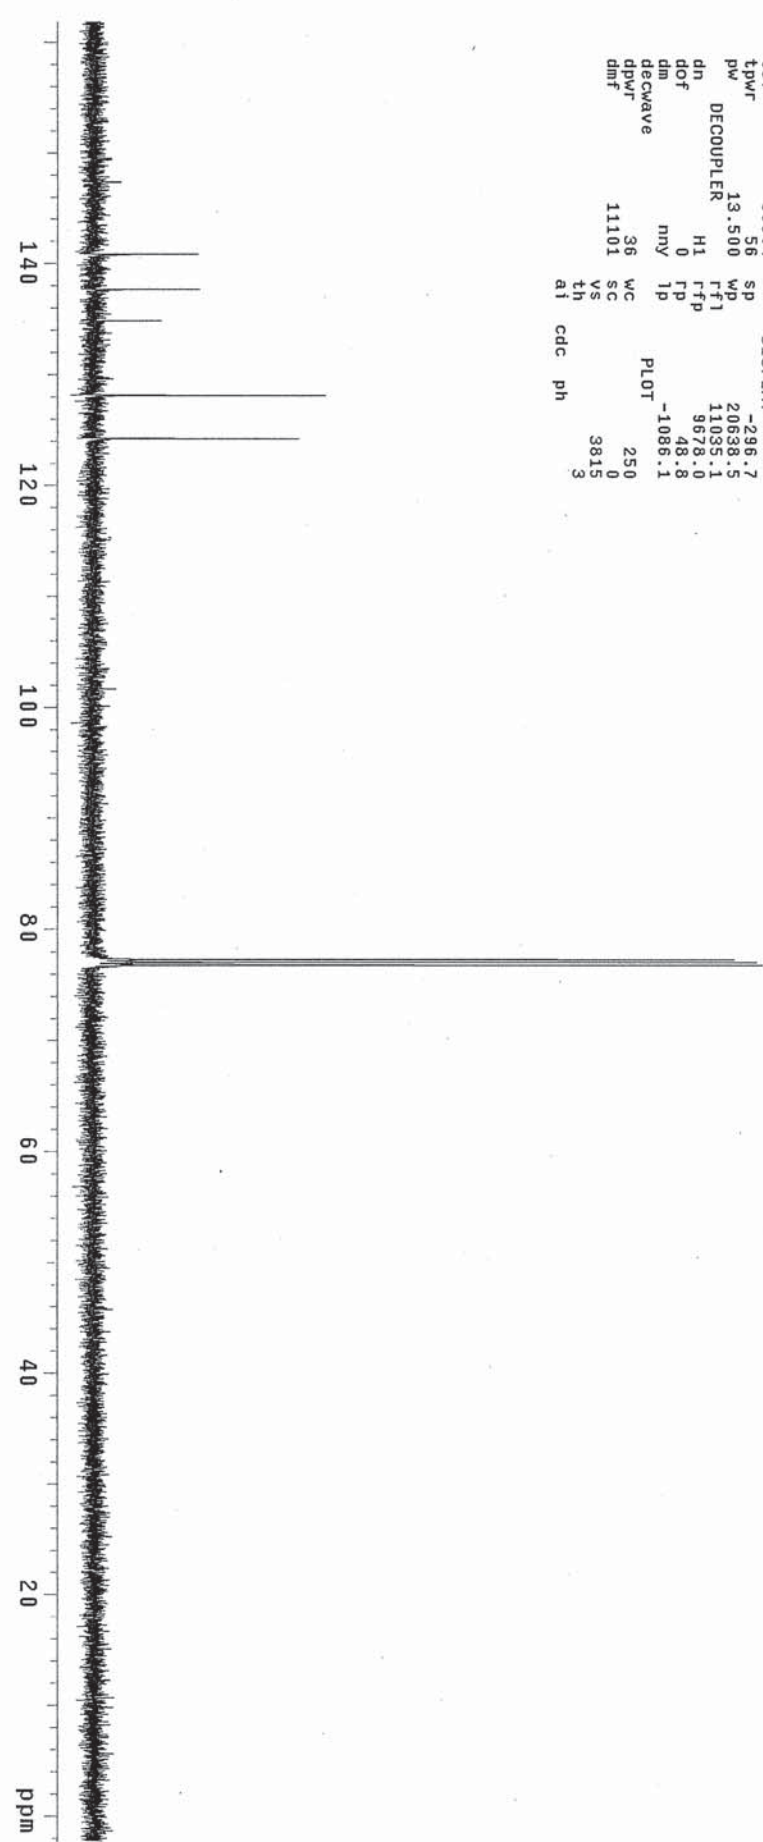

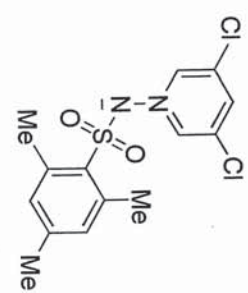

1c93-169-H  
 expl1 PROTON

|         |             |         |   |
|---------|-------------|---------|---|
| SAMPLE  | Jan 16 2011 | satmode | n |
| solvent | CDCl3       | wet     | n |
| file    | exp         | SPECIAL | n |

|             |             |          |          |
|-------------|-------------|----------|----------|
| ACQUISITION | temp        | not used |          |
| sw          | 7997.6      | gain     | not used |
| at          | 2.049       | spin     | not used |
| np          | 32768       | hst      | 0.008    |
| fb          | 4000        | pw90     | 9.100    |
| bs          | 2           | at9a     | 8.500    |
| ds          | 1.000       | flags    | n        |
| dl          | 16          | i1       | n        |
| dt          | 16          | in       | n        |
| ct          | 16          | dp       | y        |
| tn          | HS          | hs       | nm       |
| TRANSMITTER | H1          | fn       | not used |
| stfrq       | 499.859     | fn       | not used |
| tof         | 499.9       | fn       | not used |
| tpwr        | 53          | DISPLAY  | -66.2    |
| pw          | 4.550       | SP       | 4603.1   |
| DECOUPLER   | C13         | WP       | 4632.9   |
| dn          | 0           | rfl      | 3629.0   |
| dof         | 0           | rfd      | -122.3   |
| dm          | nmn         | rp       | 0.4      |
| decwave     | W40_5mm3G1~ | lp       |          |
| dpwr        | 47          | WC       | 250      |
| dmf         | 32258       | SC       | 0        |
|             |             | VS       | 32       |
|             |             | th       | 3        |
|             |             | ai       | cdc      |
|             |             |          | ph       |

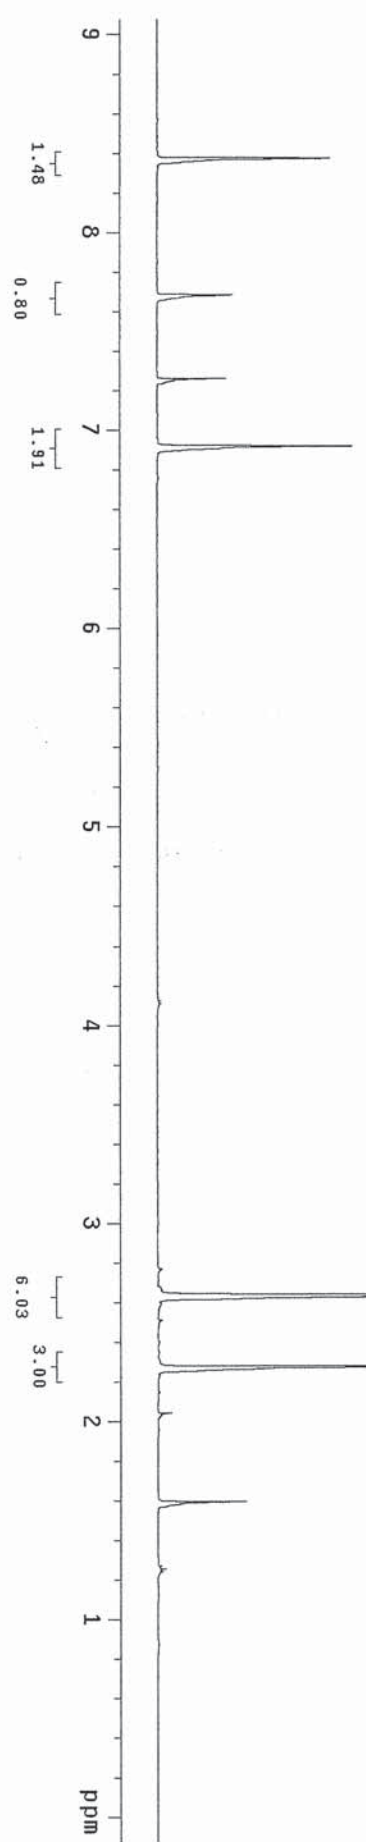

1c93-169-13C  
 exp25 std13c

SAMPLE DEC. & VT  
 date Jan 16 2011 dfrq 399.951  
 solvent cdcl3 dn HI  
 file exp dpwr 40  
 ACQUISITION dof 0  
 sfrq 100.577 dm nny  
 tn C13 dmm W  
 at 0.701 dmf 6700  
 np 39216 dseq  
 sw 27972.0 dres 90.0  
 fb not used homo n  
 bs 2 PROCESSING  
 ss 4 lb 1.00  
 tpwr 58 wfile  
 pw 7.0 proc ft  
 dl 1.300 fn 65536  
 lof 525.7 math f  
 nt 100000  
 ct 1596 werr  
 alock n wexp  
 gain 44 wbs  
 FLAGS wnt

DISPLAY  
 sp -465.8  
 wp 15259.6  
 vs 6974  
 sc 0  
 wc 250  
 hzmm 61.04  
 is 500.00  
 rfl 11705.9  
 rfp 7743.7  
 th 0  
 ins 100.000  
 at ph

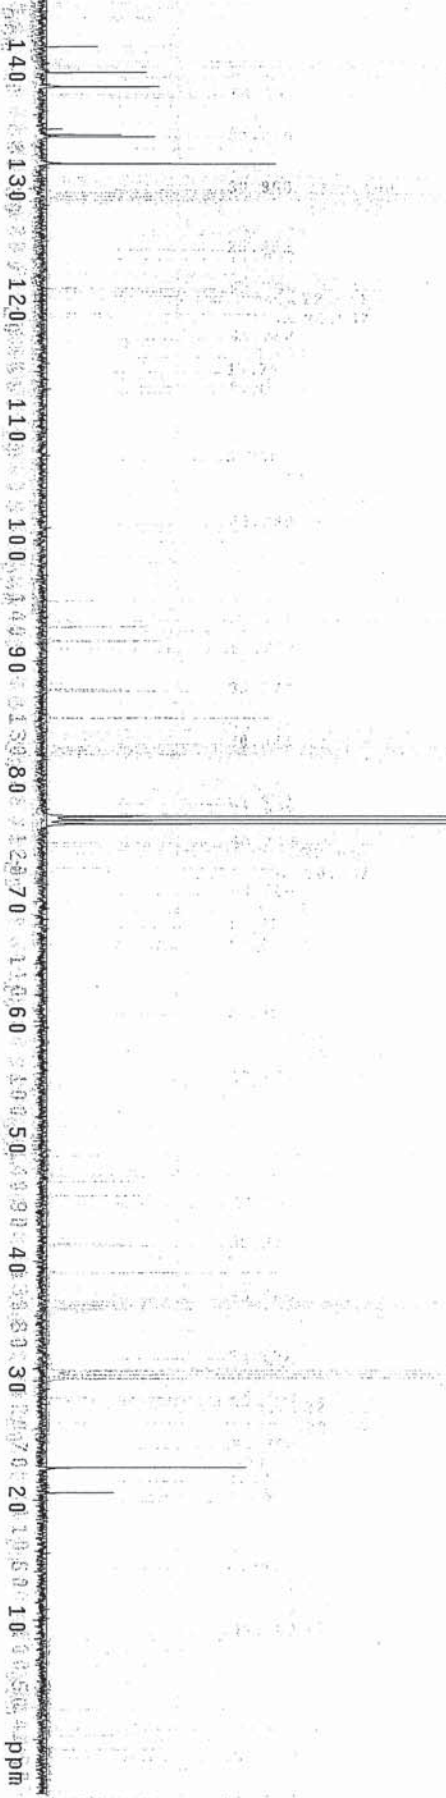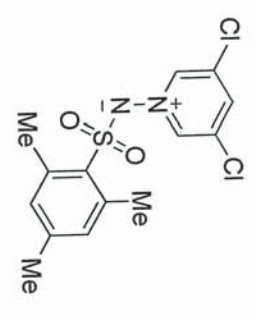

1c92-198

exp25 s2pul1

|                  |          |                |             |            |         |
|------------------|----------|----------------|-------------|------------|---------|
| SAMPLE           |          | date           | Oct 13 2010 | dn         | H1      |
| solvent          |          | cdcl3          |             | dof        | -1425.0 |
| file             |          | /home/Zhang/cv |             | dm         | nm      |
| q11/1c92-198.fid |          |                |             | dmm        | C       |
| ACQUISITION      |          |                |             | dmf        | 200     |
| sfrq             |          | 399.951        |             | PROCESSING |         |
| tn               | H1       | 1b             | 0.10        |            |         |
| at               | 2.502    | fn             | 65536       |            |         |
| np               | 36008    | math           |             |            |         |
| sw               | 7196.8   |                |             |            |         |
| fb               | not used | weff           |             |            |         |
| bs               | 2        | wexp           |             |            |         |
| pw               | 8.0      | wbs            |             |            |         |
| tpwr             | 57       | wnt            |             |            |         |
| d1               | 3.000    | sp             | -144.6      | DISPLAY    |         |
| tof              | -6.9     | wp             | 3825.3      |            |         |
| nt               | 12       | vs             | 86          |            |         |
| ct               | 12       | sc             | 0           |            |         |
| alock            | not used | h2mm           | 250         |            |         |
| gain             |          | ts             | 15.30       |            |         |
| fl               | not used | ft1            | 430.78      |            |         |
| in               | n        | ftf            | 4502.9      |            |         |
| dp               | y        | th             | 2903.6      |            |         |
| hs               | nm       | ins            | 3           |            |         |
|                  | ai       | ph             | 3.000       |            |         |

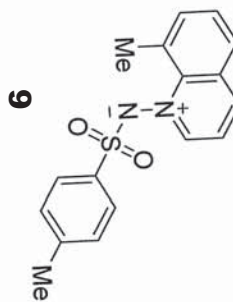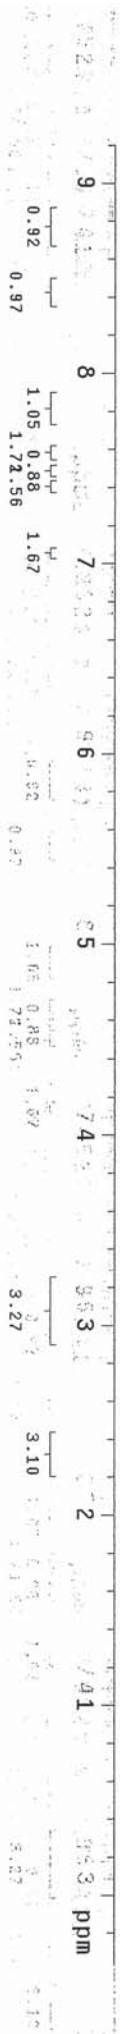

1cq2-198-13C  
 exp25 CARBON

|             |             |            |          |
|-------------|-------------|------------|----------|
| date        | Dec 19 2010 | temp       | not used |
| solvent     | cdcl3       | gain       | 54       |
| file        | exp         | spin       | not used |
| ACQUISITION | 28258.6     | hst        | 0.008    |
| sw          | 1.300       | pw90       | 9.200    |
| at          | 73498       | afca       | 10.000   |
| np          | 16000       | FLAGS      |          |
| fb          | 3.000       | l1         | n        |
| bs          | 10000       | dp         | n        |
| d1          | 10000       | hs         | y        |
| nt          | 1000        | PROCESSING | m        |
| ct          | 1000        | lb         | 0.50     |
| TRANSMITTER | C13         | isfid      | 2        |
| tn          | 125.702     | fn         | not used |
| sfrq        | 865.4       | DISPLAY    |          |
| tof         | 56          | sp         | -562.3   |
| lpwr        | 13.500      | wd         | 22063.2  |
| PW          |             | FF1        | 11035.5  |
| DECOUPLER   | H1          | TFP        | 3678.0   |
| dn          | 0           | tp         | 145.5    |
| dof         | nny         | tp         | -861.2   |
| dm          |             | PLOT       |          |
| decwave     |             | wc         | 250      |
| dpwr        | 36          | sc         | 0        |
| dmf         | 11101       | vs         | 5794     |
|             |             | th         | 7        |
|             |             | ai         | cdc      |
|             |             |            | ph       |

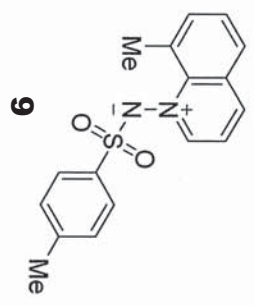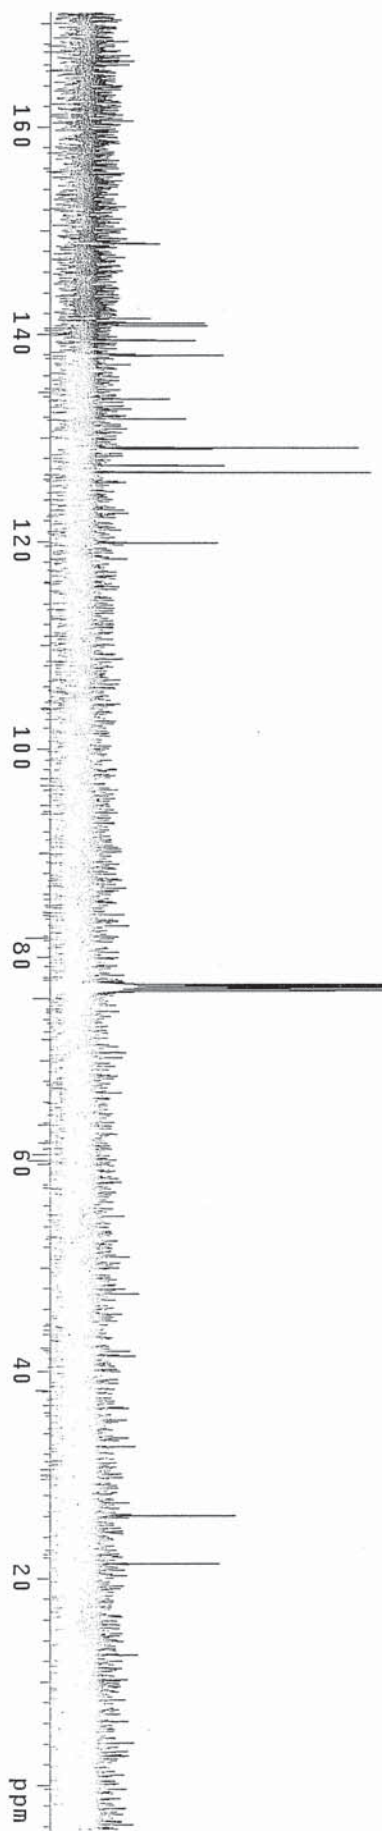

1c93-78-H

exp2 PROTON

| SAMPLE      |             | PRESATURATION |            |
|-------------|-------------|---------------|------------|
| date        | Dec 8 2010  | satmode       | n          |
| solvent     | CDC13       | wet           | n          |
| file        | exp         | SPECIAL       | n          |
| ACQUISITION | exp         | temp          | not used   |
| sw          | 7897.6      | gain          | not used   |
| at          | 2.048       | sp1n          | not used   |
| np          | 32768       | hst           | 0.008      |
| fb          | 4000        | pw90          | 9.100      |
| bs          | 2           | atfa          | 6.600      |
| d1          | 1.000       | FLAGS         | n          |
| nt          | 20          | i1            | n          |
| ct          | 20          | in            | n          |
| TRANSMITTER | H1          | dp            | y          |
| tn          | 499.859     | hs            | nm         |
| sfrq        | 499.9       | fn            | PROCESSING |
| tof         | 53          | not used      | not used   |
| tpwr        | 4.550       | SP            | DISPLAY    |
| pw          | C13         | wp            | -228.3     |
| dn          | 0           | rfl           | 4213.1     |
| dof         | 0           | rfl           | 4632.9     |
| dm          | nm          | rfl           | 3629.0     |
| decwave     | W40_5mm3G1~ | tp            | 47.4       |
|             |             | lp            | 0.7        |
| dpwr        | 47          | WC            | 250        |
| dmf         | 32258       | SC            | 0          |
|             |             | VS            | 46         |
|             |             | th            | 2          |
|             |             | at            | cdc ph     |

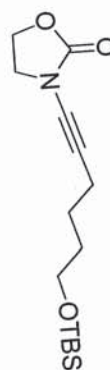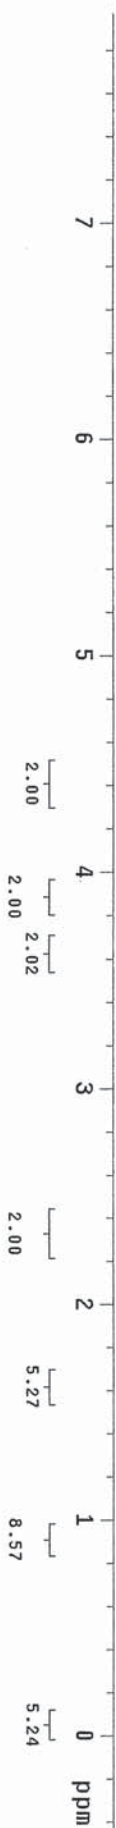

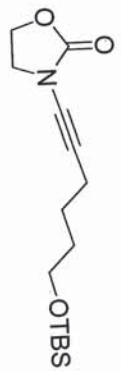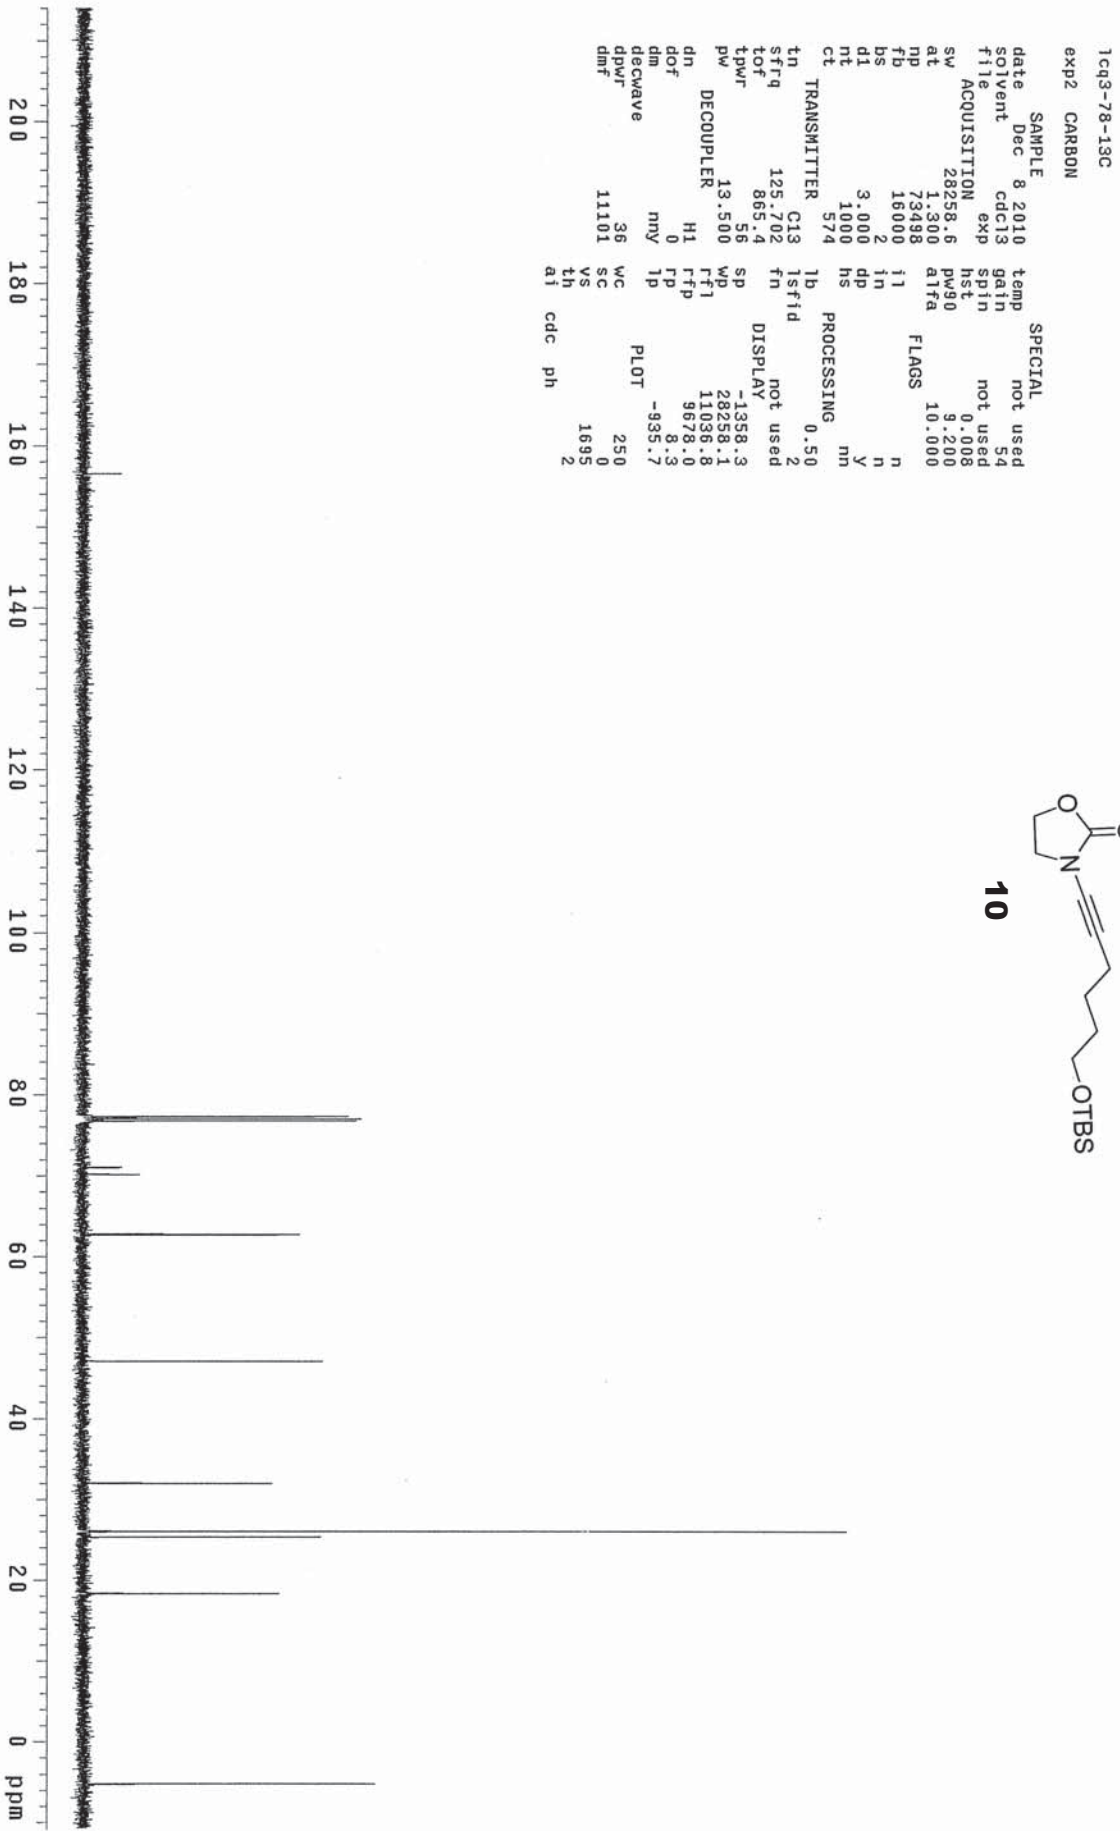

1cq2-192

exp25 szpu1

|             |                |            |         |           |
|-------------|----------------|------------|---------|-----------|
| date        | Oct 12 2010    | dn         | H1      | DEC. & VT |
| solvent     | cdcl3          | dof        | -1425.0 |           |
| file        | /home/Zhang/cv | dm         | nm      |           |
| q1          | 1cq2-192.fid   | dmm        | C       |           |
| ACQUISITION |                | dmf        | 200     |           |
| sfrq        | 399.951        | temp       | 22.0    |           |
| tn          | H1             | PROCESSING | 0.10    |           |
| at          | 2.502          | fb         | 65536   |           |
| np          | 36008          | fn         |         |           |
| sw          | 7196.8         | math       |         |           |
| fb          | not used       | werr       |         |           |
| bs          | 2              | wexp       |         |           |
| pw          | 8.0            | wbs        |         |           |
| tpwr        | 8.0            | wnt        |         |           |
| di          | 3.000          | sp         |         | DISPLAY   |
| tof         | -5.9           | wp         | -97.0   |           |
| nt          | 10             | vs         | 3615.1  |           |
| ct          | 8              | sc         | 56      |           |
| atlock      | n              | wc         | 250     |           |
| gain        | not used       | h2mm       | 14.48   |           |
| fl          | n              | ls         | 327.48  |           |
| in          | n              | rfl        | 4503.7  |           |
| dp          | y              | rfl        | 2903.6  |           |
| th          | nn             | ins        | 44      |           |
| hs          |                | ai         | 2.000   | ph        |

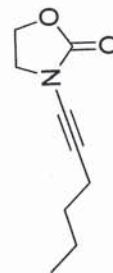

13a

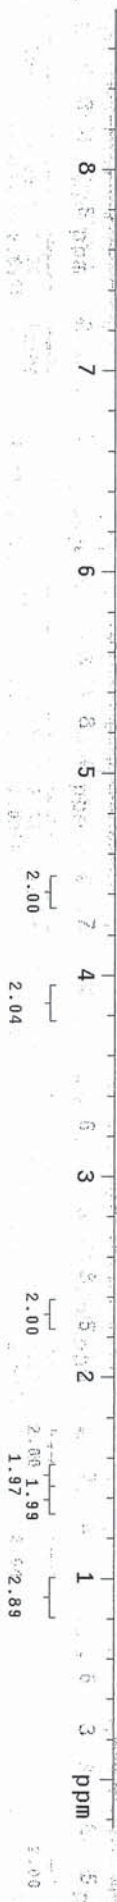



1c42-263-13C  
 exp2 CARBON

|             |             |            |          |
|-------------|-------------|------------|----------|
| date        | Dec 6 2010  | temp       | not used |
| solvent     | cdcl3       | gain       | 54       |
| file        | exp         | spin       | not used |
| ACQUISITION | 28258.6     | hst        | 0.008    |
| sw          | 1.300       | pw90       | 9.200    |
| at          | 73498       | atfa       | 10.000   |
| np          | 16000       | FLAGS      |          |
| fb          | 2           | i1         | n        |
| bs          | 3.000       | in         | n        |
| dl          | 10000       | dp         | y        |
| nt          | 590         | hs         | nn       |
| ct          | TRANSMITTER | PROCESSING | 0.50     |
| tn          | G13         | lb         | 1b       |
| sfrq        | 125.702     | lsfid      | 2        |
| tof         | 865.4       | fn         | not used |
| tpwr        | 56          | SP         | DISPLAY  |
| pw          | 13.500      | wp         | -894.8   |
| DECOUPLER   | H1          | rf1        | 21367.3  |
| dn          | 0           | rfp        | 11036.8  |
| dof         | 0           | tp         | 3878.0   |
| dm          | nny         | tp         | -143.9   |
| decwave     |             | PLOT       | -927.8   |
| dpwr        | 36          | wc         | 250      |
| dmf         | 11101       | sc         | 0        |
|             |             | th         | 1130     |
|             |             | vs         | 0        |
|             |             | ai         | 4        |
|             |             | cdc        | ph       |

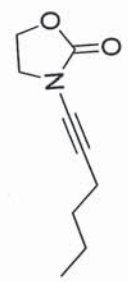

**13a**

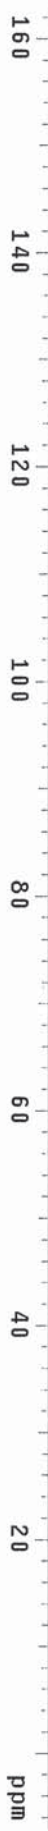

1c93-106-H

exp25 PROTON

|             |             |               |          |
|-------------|-------------|---------------|----------|
| SAMPLE      | Dec 14 2010 | PRESATURATION | n        |
| date        | Dec 14 2010 | satmode       | n        |
| solvent     | CDCl3       | wet           | n        |
| file        | exp         | SPECIAL       |          |
| ACQUISITION |             | temp          | not used |
| sw          | 7997.6      | gain          | not used |
| at          | 2.049       | spin          | not used |
| np          | 32768       | hst           | 0.008    |
| fb          | 4000        | pw90          | 9.100    |
| bs          | 2           | atfa          | 6.600    |
| d1          | 1.000       | FLAGS         |          |
| nt          | 12          | i1            | n        |
| ct          | 12          | in            | n        |
| TRANSMITTER | H1          | dp            | y        |
| tn          | 499.859     | hs            | nh       |
| sfrq        | 499.9       | fn            | not used |
| tof         | 53          | PROCESSING    |          |
| tpwr        | 53          | not used      |          |
| pw          | 4.550       | DISPLAY       |          |
| DECOUPLER   | C13         | sp            | -84.3    |
| dn          | 0           | wd            | 3909.5   |
| dof         | 0           | rf1           | 4632.4   |
| dm          | nmn         | rfp           | 3629.0   |
| decwave     | W40_5mm3G1~ | tp            | 57.2     |
|             | dp          | PLOT          | -4.6     |
| dpwr        | 47          | wc            | 250      |
| dmf         | 32258       | sc            | 0        |
|             | vs          | th            | 24       |
| ai          | cdc         | ph            | 2        |

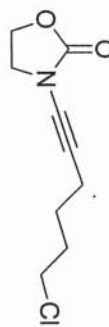

13b

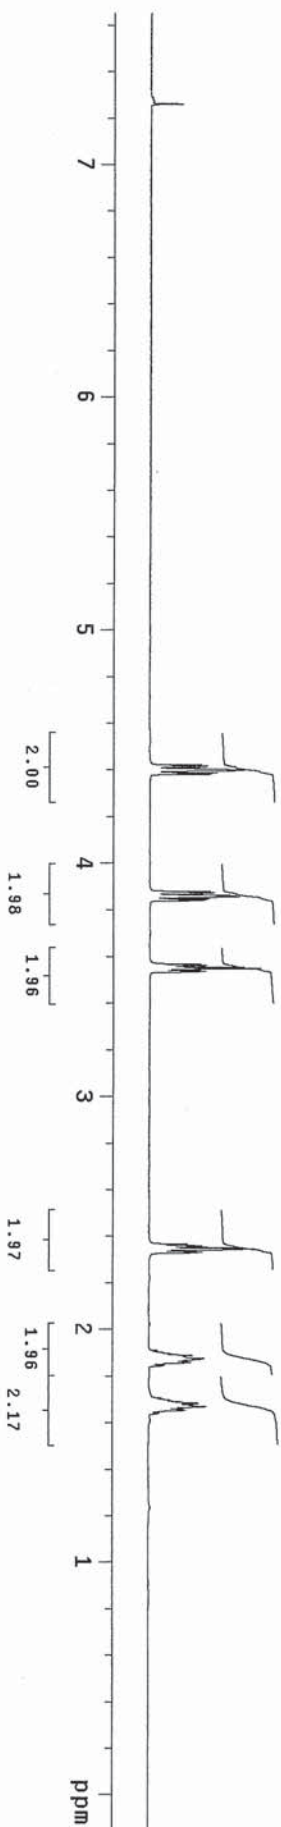

1cq3-106-13C  
exp25 CARBON

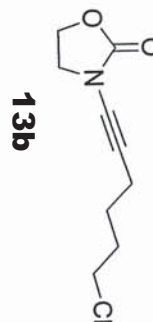

|             |             |            |          |          |
|-------------|-------------|------------|----------|----------|
| date        | Dec 14 2010 | SAMPLE     | temp     | not used |
| solvent     | cdc13       | cdc13      | gain     | 54       |
| file        | exp         | exp        | spin     | not used |
| ACQUISITION |             | sw         | hst      | 0.008    |
| at          | 1.300       | 28258.6    | pw90     | 9.200    |
| np          | 73498       | 16000      | atfa     | 10.000   |
| fb          | 16000       | 2          | flags    | n        |
| bs          | 3.000       | in         | dp       | n        |
| dl          | 10000       | hs         | hs       | y        |
| nt          | 10000       | hs         | hs       | nm       |
| ct          | 184         | PROCESSING |          | 0.50     |
| TRANSMITTER |             | 1b         | 1sfid    | 2        |
| tn          | C13         | fn         | not used |          |
| sfrq        | 125.702     | fn         | not used |          |
| tof         | 865.4       | sp         | DISPLAY  | -534.3   |
| tpwr        | 56          | wp         | 24017.4  |          |
| pw          | 13.500      | ffl        | 11040.7  |          |
| DECOUPLER   |             | ffp        | 9678.0   |          |
| dn          | H1          | tp         | -30.5    |          |
| dof         | 0           | tp         | -947.8   |          |
| dm          | my          | tp         |          |          |
| decwave     |             | PLOT       |          |          |
| dpwr        | 36          | WC         | 250      |          |
| dmf         | 11101       | SC         | 0        |          |
|             |             | VS         | 1040     |          |
|             |             | th         |          |          |
|             |             | ai         | cdc      | ph       |
|             |             |            |          | 3        |

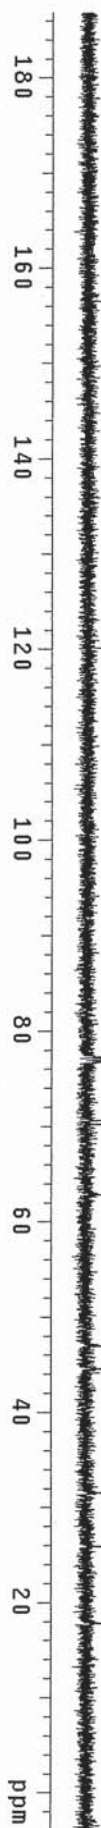

lcq3-70-h

expt1 PROTON

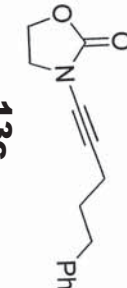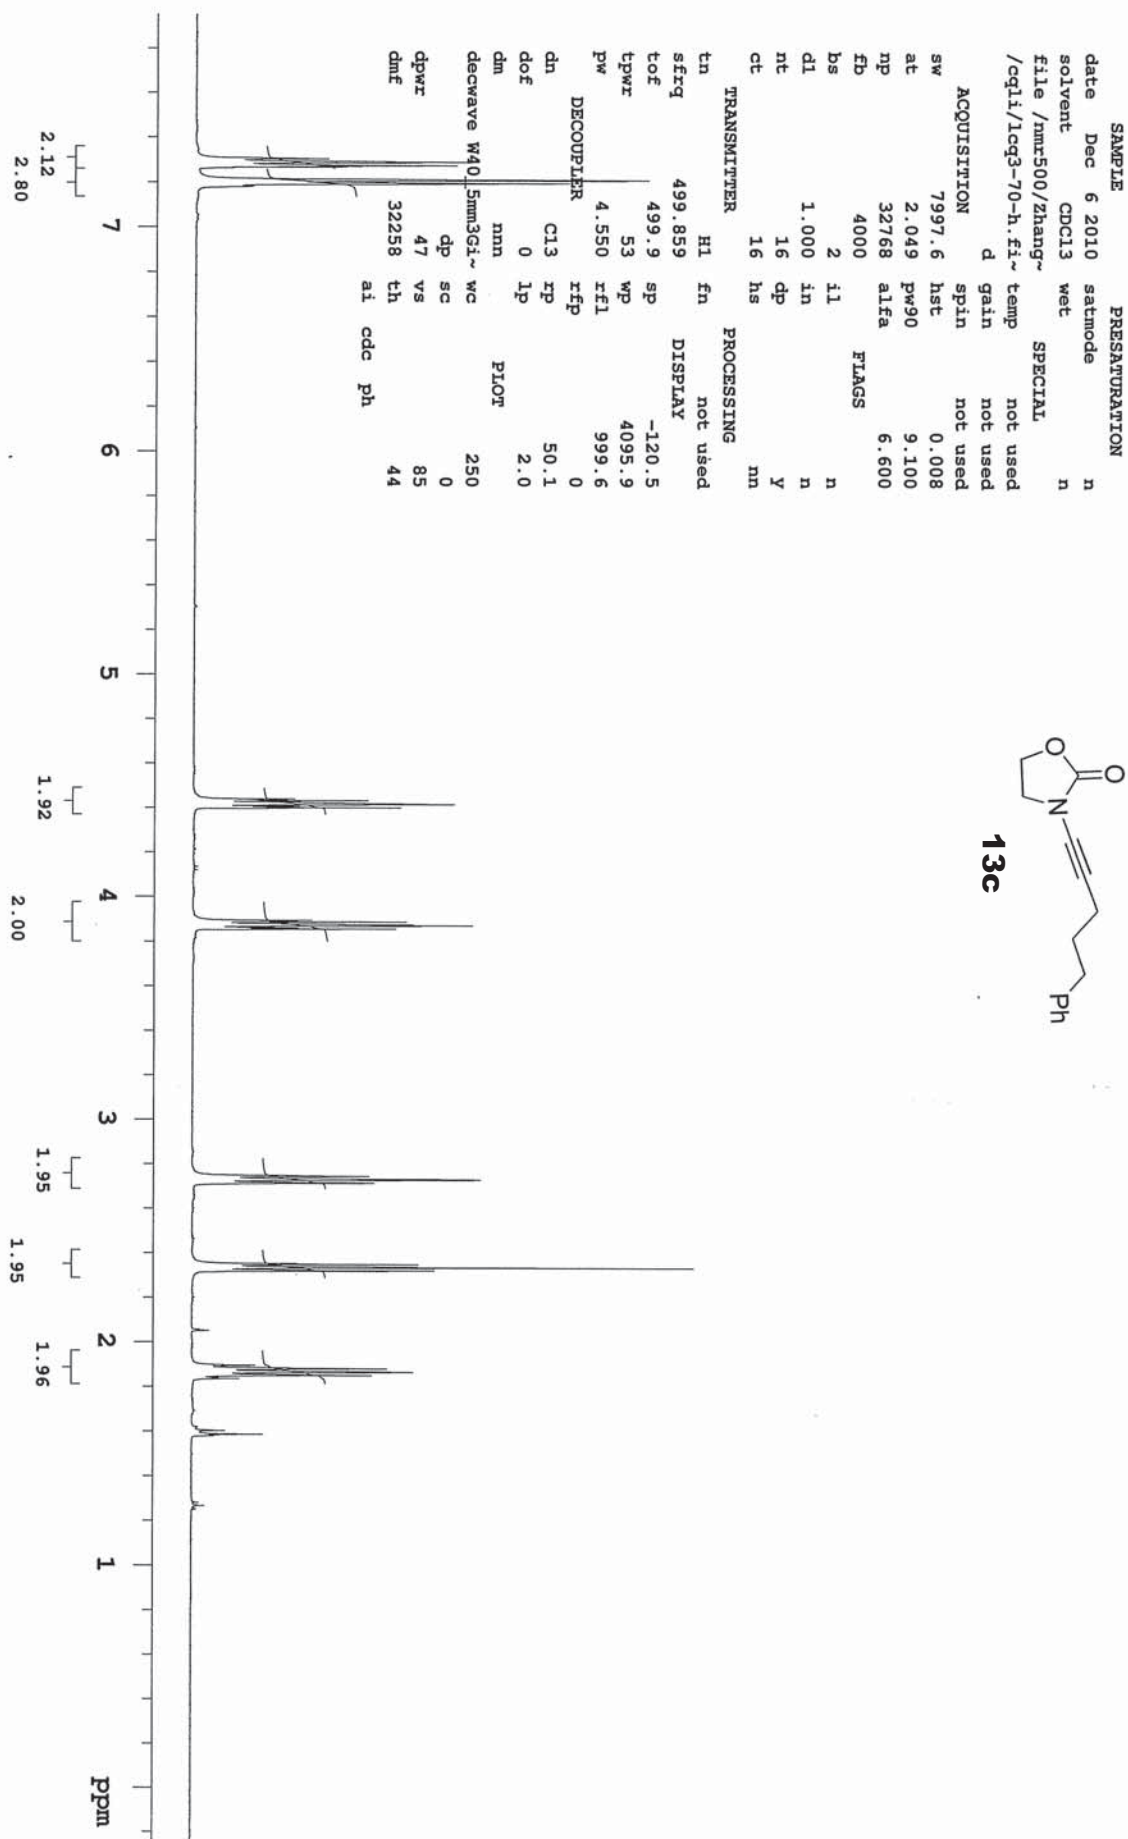

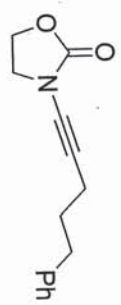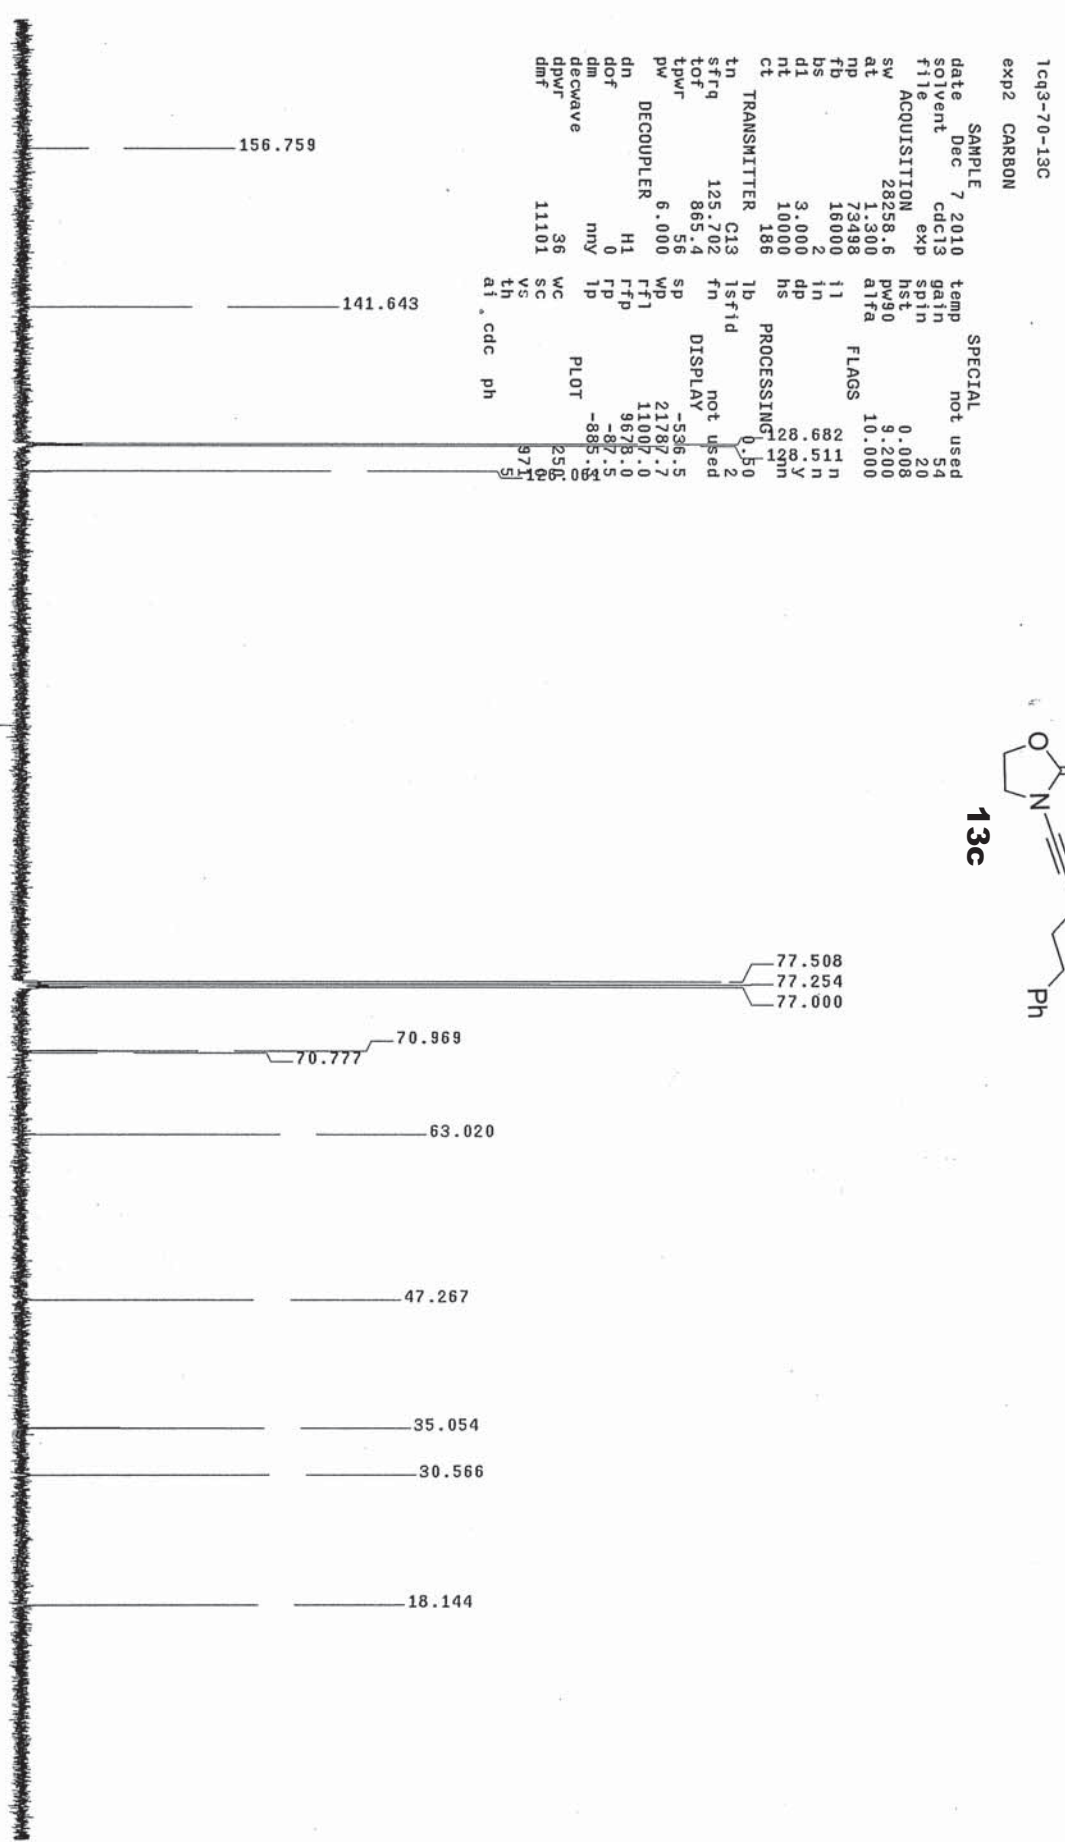

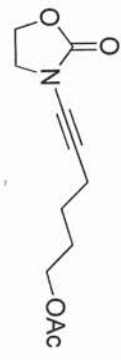

```

1c93-92
exp25 s2pu1
SAMPLE Dec 10 2010 dn
solvent CDC13 dm
file exp dm
ACQUISITION dmm
sfrq 499.859 H1 dmf
tn 2.500 1b
at 42518 fn
np 8503.4 math
sw not used
fb 2 wefr
bs 7.8 wexp
pw 7.8 wbs
tpwr 57 wnt
di 4.800
tof 0 sp
nt 16 wp
ct 16 vs
alock n SC
gain not used hc
flags not used hzmm
i1 n 16.07
in n 136.03
dp y rfl 5384.7
hs mn th 3629.0
aj ins 3.000
  
```

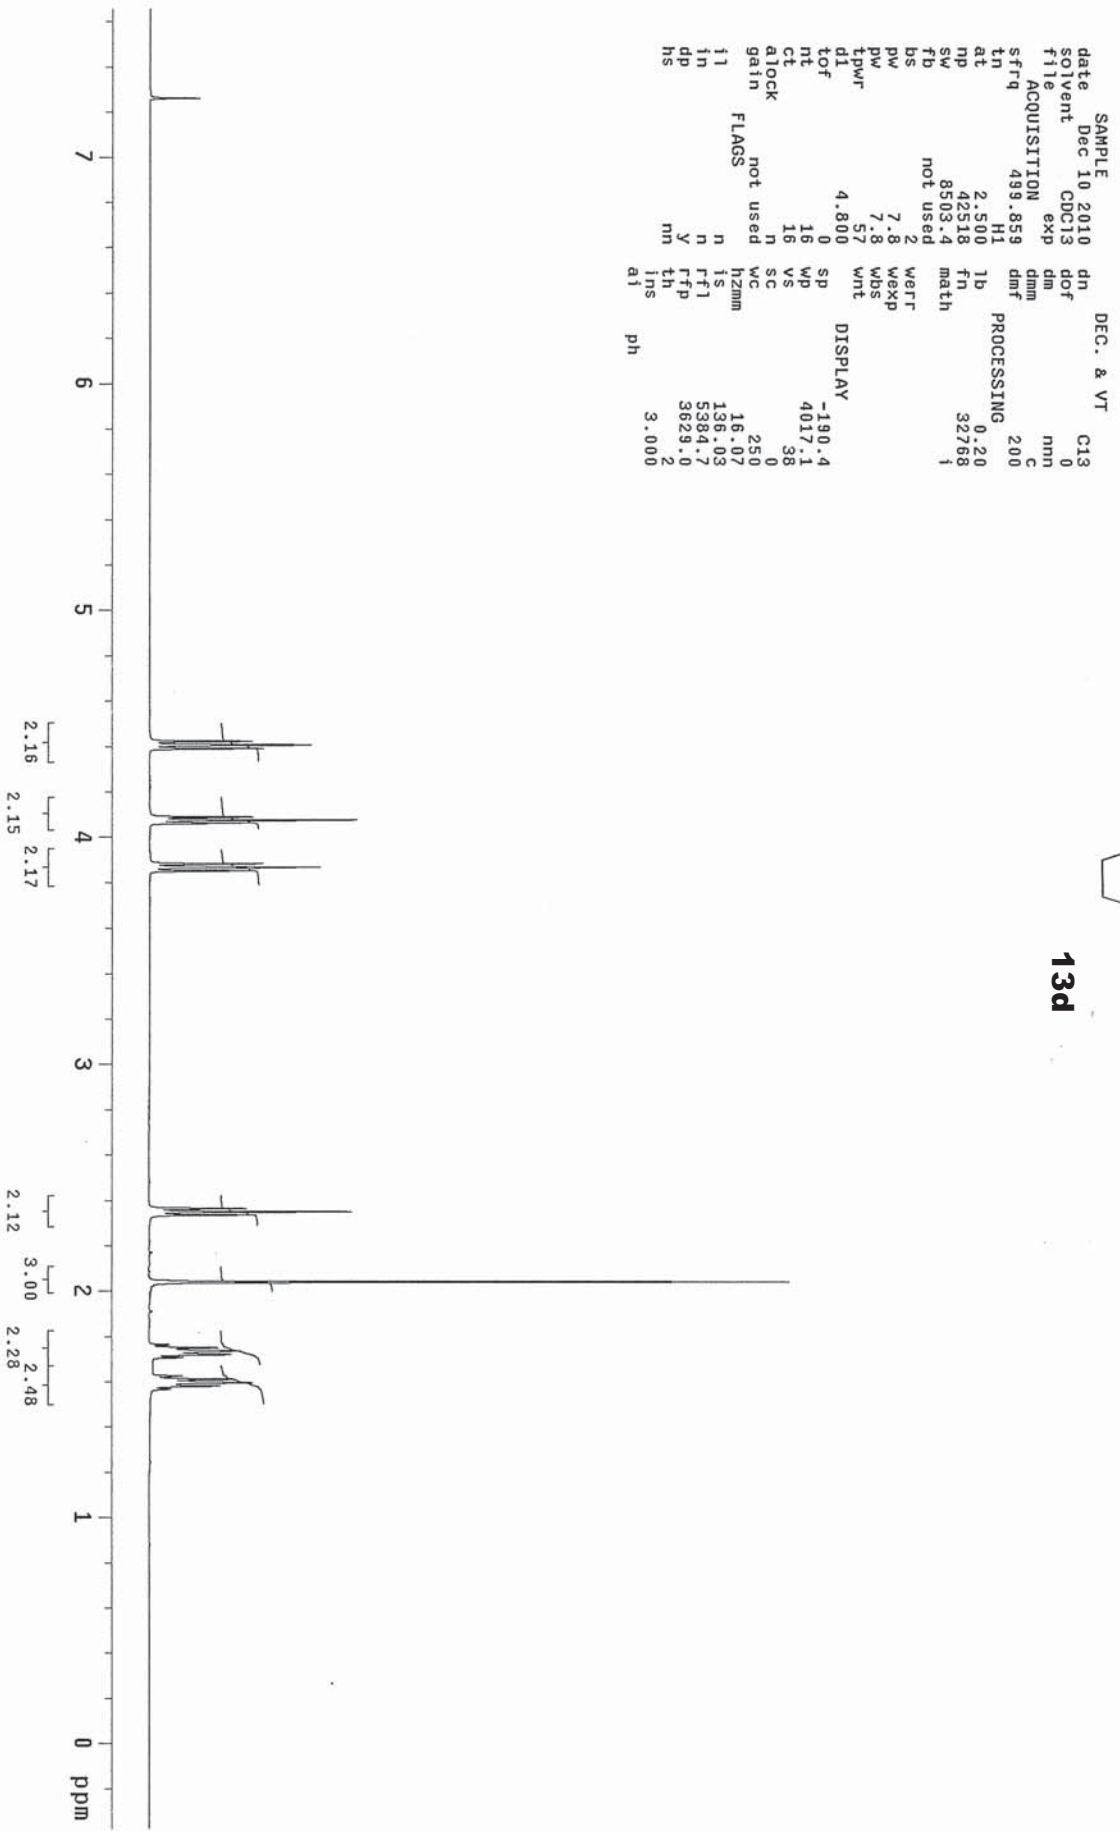

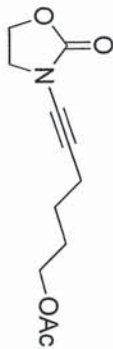

**13d**

1c93-92-13C  
 exp25 CARBON

|             |             |             |          |
|-------------|-------------|-------------|----------|
| SAMPLE      | Dec 10 2010 | temp        | not used |
| date        | Dec 10 2010 | gain        | 54       |
| solvent     | cdcl3       | spin        | not used |
| file        | exp         | hst         | 0.008    |
| ACQUISITION | 28258.6     | pw30        | 9.200    |
| sw          | 1.300       | atfa        | 10.000   |
| at          | 73498       | FLAGS       |          |
| np          | 16000       | i1          | n        |
| fb          | 4           | in          | n        |
| bs          | 3.000       | dp          | y        |
| d1          | 10000       | hs          | nm       |
| nt          | 372         | PROCESSING  | 0.50     |
| ct          |             | TRANSMITTER |          |
| tn          | C13         | lb          | 1sfid    |
| sfra        | 125.702     | fn          | not used |
| tof         | 865.4       | sp          | DISPLAY  |
| tpwr        | 56          | wp          | -1359.2  |
| DW          | 13.500      | ft1         | 28258.1  |
| DECOUPLER   | H1          | rfp         | 1037.6   |
| dn          | 0           | tp          | 9676.0   |
| dof         | 0           | nmv         | -119.8   |
| dm          | nmv         | 1p          | -907.0   |
| decwave     |             | PLOT        |          |
| dpwr        | 36          | wc          | 250      |
| dmf         | 11101       | sc          | 0        |
|             |             | th          | 581      |
|             |             | ai          | cdc ph   |

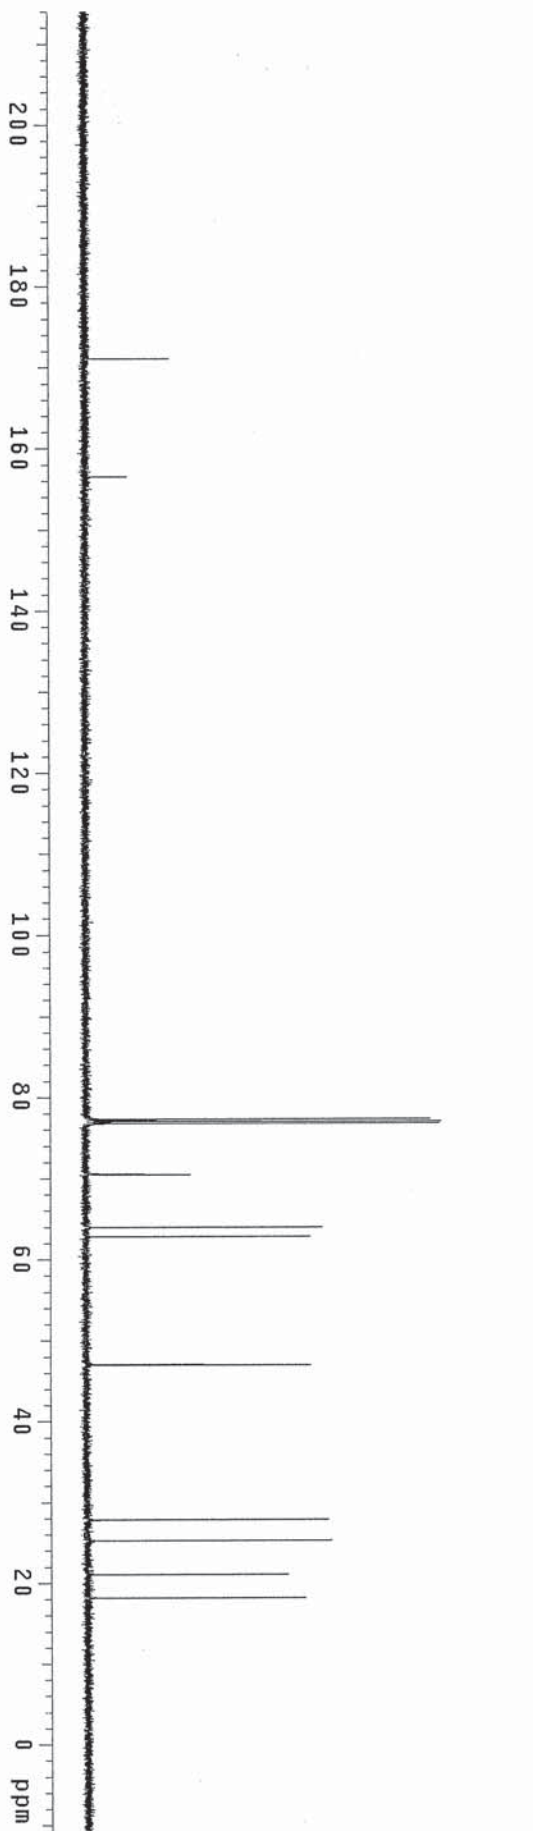

1c93-110-H

exp25 PROTON

|             |             |               |            |
|-------------|-------------|---------------|------------|
| SAMPLE      | Dec 27 2010 | PRESATURATION | n          |
| date        | Dec 27 2010 | satmode       | n          |
| solvent     | CDCl3       | wet           | n          |
| file        | exp         | SPECIAL       |            |
| ACQUISITION | 7997.6      | temp          | not used   |
| sw          | 2.049       | gain          | not used   |
| at          | 32758       | spin          | not used   |
| np          | 4000        | hst           | 0.008      |
| fb          | 4000        | pw90          | 9.100      |
| bs          | 2           | alfa          | 6.500      |
| d1          | 1.000       | FLAGS         |            |
| nt          | 16          | i1            | n          |
| ct          | 16          | in            | n          |
| TRANSMITTER | H1          | dp            | y          |
| tn          | 499.859     | hs            | nm         |
| sffq        | 499.9       | fn            | PROCESSING |
| tof         | 53          | not used      |            |
| tpwr        | 4.550       | sp            | DISPLAY    |
| pw          | 4.550       | wp            | -178.0     |
| DECOUPLER   | C13         | TF1           | 4265.3     |
| dn          | 0           | TFP           | 4632.4     |
| dof         | nmn         | TP            | 3623.0     |
| dm          | nmn         | TP            | 156.1      |
| decwave     | W40_5mm3G1~ | TP            | -4.9       |
| dpwr        | 47          | PLOT          |            |
| dmf         | 32258       | wc            | 250        |
|             |             | sc            | 0          |
|             |             | vs            | 18         |
|             |             | th            | 2          |
|             |             | ai            | cdc        |
|             |             |               | ph         |

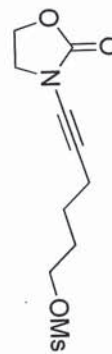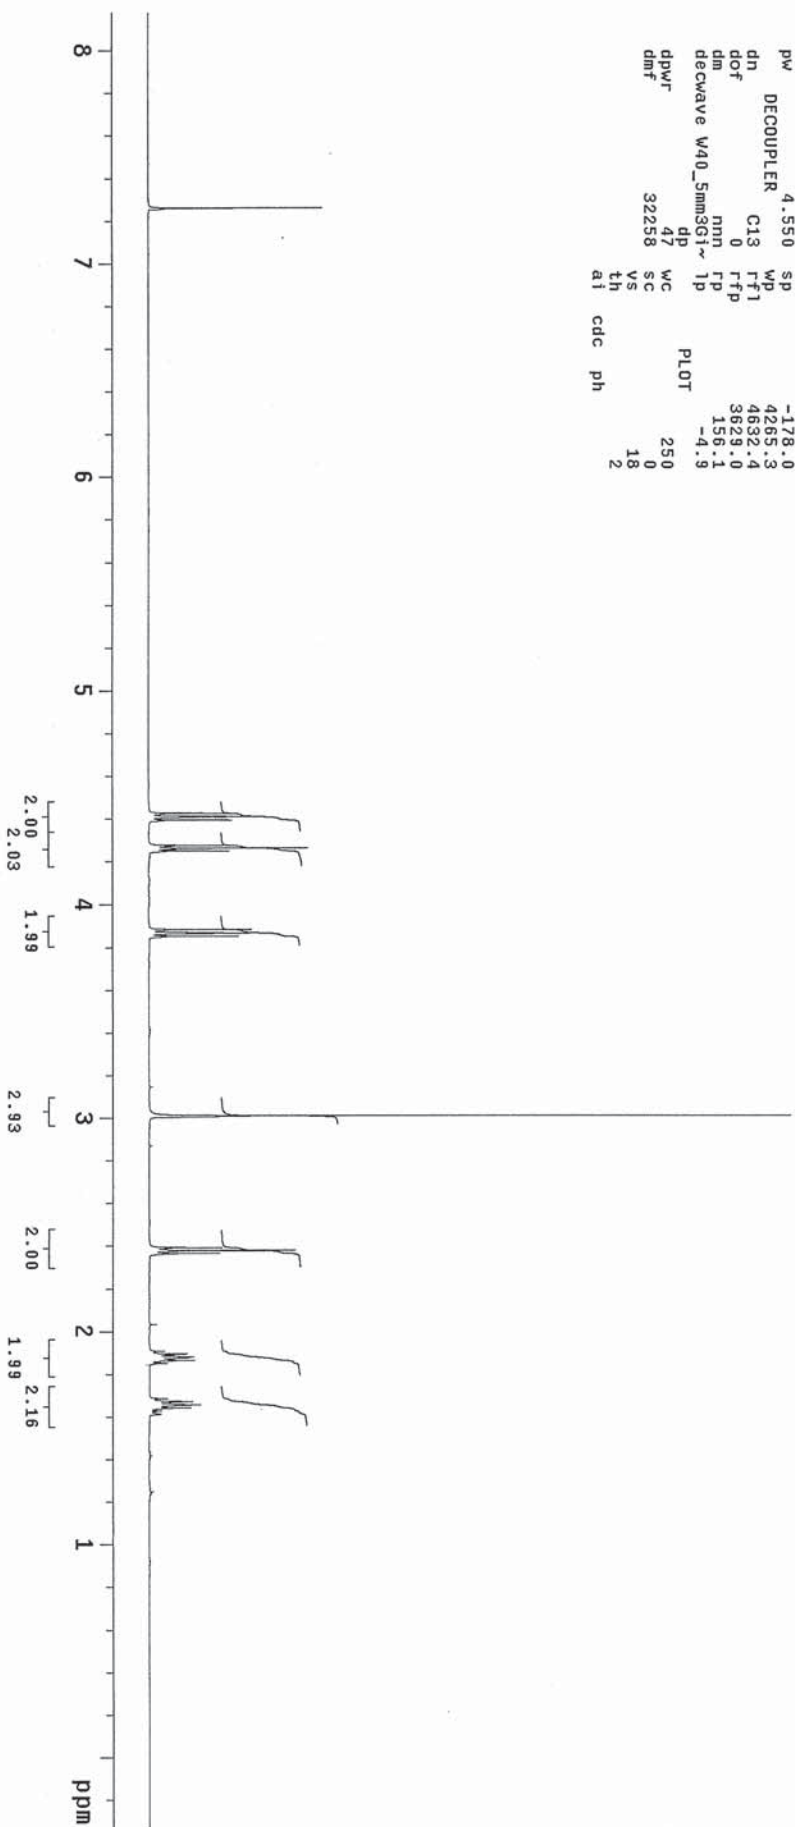



1c93-110-13C  
exp25 CARBON

|             |             |            |          |
|-------------|-------------|------------|----------|
| SAMPLE      | Dec 27 2010 | temp       | not used |
| date        | Dec 27 2010 | gain       | 54       |
| solvent     | cdc13       | spin       | not used |
| file        | exp         | hst        | 0.008    |
| ACQUISITION | 28258.6     | pw90       | 9.200    |
| sw          | 1.300       | alfa       | 10.000   |
| at          | 73498       | FLAGS      |          |
| np          | 16000       | i1         | n        |
| fb          | 2           | in         | n        |
| bs          | 3.000       | dp         | y        |
| d1          | 10000       | hs         | m        |
| nt          | 210         | PROCESSING |          |
| ct          | 210         | lb         | 0.50     |
| TRANSMITTER |             | isfid      | 2        |
| tn          | C13         | fn         | not used |
| sffq        | 125.702     | DISPLAY    |          |
| tof         | 865.4       | SP         | -367.4   |
| tpwr        | 56          | WD         | 21499.6  |
| PW          | 13.500      | RF1        | 11039.4  |
| DECOUPLER   | H1          | TFP        | 3678.0   |
| dn          | 0           | TP         | 33.7     |
| dof         | nny         | TP         | -898.5   |
| dm          | 0           | PLOT       |          |
| decwave     |             | wc         | 250      |
| dpwr        | 36          | sc         | 0        |
| dmf         | 11101       | vs         | 1695     |
|             |             | th         | 0        |
|             |             | ai         | cdc      |
|             |             | ph         | 4        |

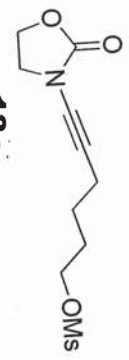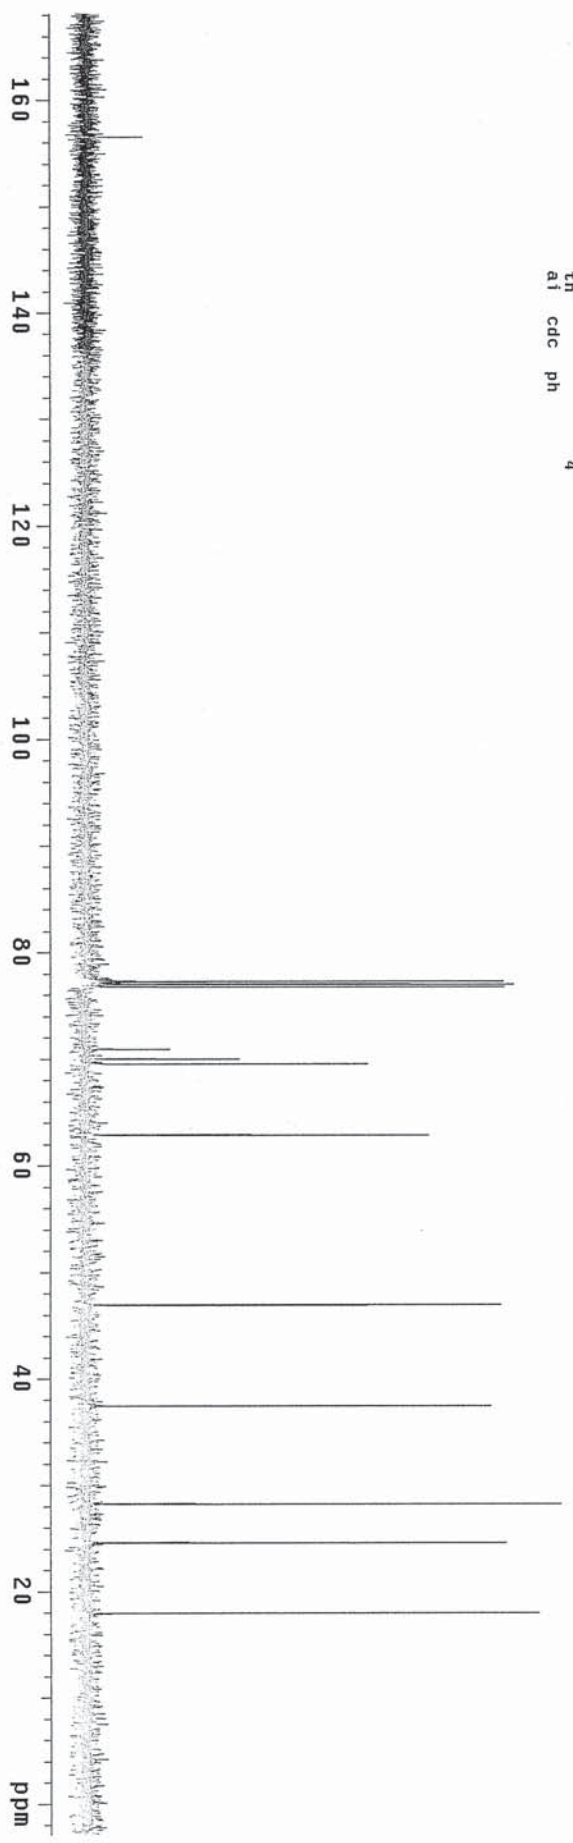

1b-II-249-2  
exp3 s2pu1

DEC. & VT

SAMPLE Oct 17 2010 dn  
date Oct 17 2010 dn  
solvent CDCl3 dm  
file /mrs00/Zhang~ dm  
/biao1u/1b-II-249-2 dmm  
2.11d dmf  
ACQUISITION 499.859 1b  
sfrq 499.859 1b  
tn H1 fn  
at 2.669 math  
np 32000  
sw 5995.2 Weff  
fb not used Weff  
bs 2 WDS  
pw 9.0 Wnt  
tpwr 9.0  
d1 3.000 sp  
tof 0 VS  
nt 16 WC  
ct 16 hzmm  
gain not used  
alock n  
11 n  
in n  
dp Y  
hs mn

PROCESSING 0.20  
32768  
1

DISPLAY 345.5  
4346.0  
49  
250  
17.88  
953.67  
498.3  
2.000  
ph

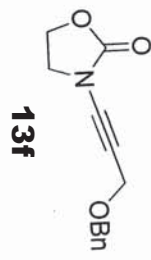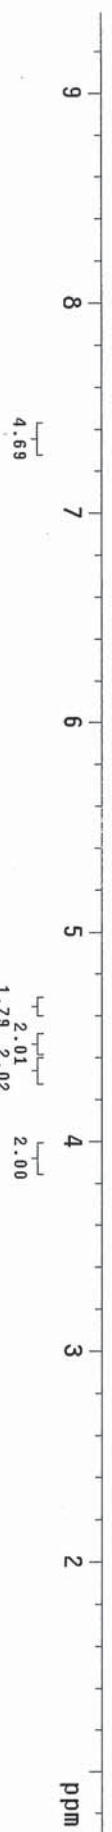

1u2-249-13C

exp25 std13c

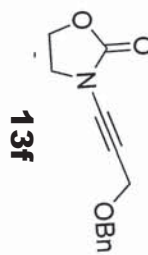

|         |             |            |         |
|---------|-------------|------------|---------|
| date    | Jan 17 2011 | dfreq      | 399.951 |
| solvent | cdc13       | dn         | H1      |
| file    | exp         | dpwr       | 40      |
| exp     |             | dof        | 0       |
| nmr     |             | nmr        | 0       |
| sfreq   | 100.577     | dm         | 6700    |
| ln      | C13         | dmm        | W       |
| at      | 0.701       | dmf        | 6700    |
| np      | 39216       | dseq       |         |
| sw      | 27972.0     | dres       | 90.0    |
| fb      | not used    | homo       | n       |
| bs      |             | PROCESSING |         |
| ss      | 4           | lb         | 1.00    |
| tpwr    | 58          | wf11e      |         |
| pw      | 7.0         | proc       | ft      |
| d1      | 1.300       | fn         | 65536   |
| tof     | 525.7       | math       | f       |
| nt      | 10000       | werr       |         |
| ct      | 1530        | wexp       |         |
| alock   | n           | wbs        |         |
| gain    | 44          | wnt        |         |
| flags   |             |            |         |
| l1      | n           |            |         |
| l2      | n           |            |         |
| dp      | y           |            |         |
| hs      | nm          |            |         |

  

|      |         |         |
|------|---------|---------|
| SP   | 1589.8  | DISPLAY |
| WP   | 14802.1 |         |
| VS   | 5517    |         |
| SC   | 0       |         |
| WC   | 250     |         |
| h2mm | 59.21   |         |
| fs   | 500.00  |         |
| ft1  | 11943.6 |         |
| ftp  | 7743.7  |         |
| th   | 0       |         |
| ins  | 100.000 |         |
| ai   |         |         |

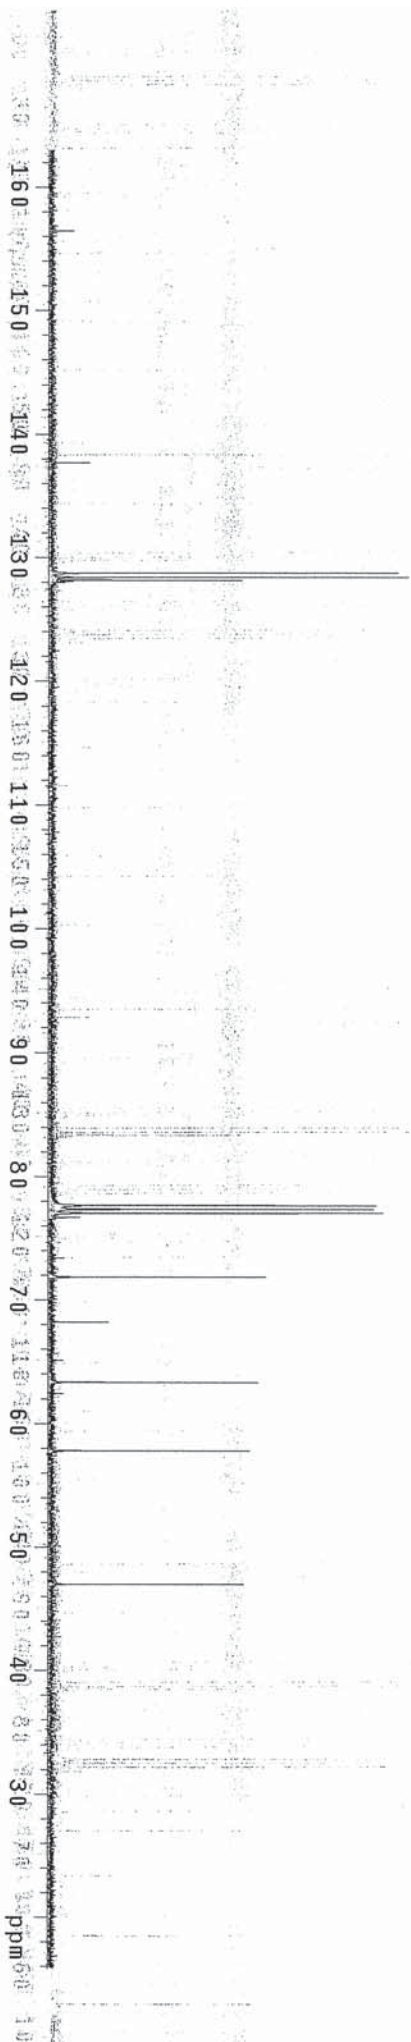

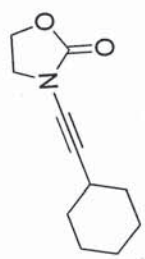

**139**

1c92-200-H  
exp25 PROTON

|             |             |               |          |
|-------------|-------------|---------------|----------|
| SAMPLE      | Dec 16 2010 | PRESATURATION | n        |
| date        | Dec 16 2010 | satmode       | n        |
| solvent     | CDCl3       | wet           | n        |
| file        | exp         | SPECIAL       |          |
| ACQUISITION | 7397.6      | temp          | not used |
| sw          | 2.049       | gain          | not used |
| at          | 32768       | spin          | not used |
| np          | 4000        | hst           | 0.008    |
| fb          | 2           | pw90          | 9.100    |
| bs          | 1.000       | alfa          | 6.800    |
| dl          | 16          | FLAGS         |          |
| nt          | 18          | i1            | n        |
| ct          | 16          | in            | n        |
| TRANSMITTER | H1          | dp            | y        |
| tn          | 499.859     | hs            | m        |
| sfrq        | 499.9       | fn            | not used |
| tof         | 53          | DISPLAY       | -122.4   |
| lpwr        | 4.550       | SP            | 3818.7   |
| PW          | DECOUPLER   | WP            | 4832.3   |
| dn          | C13         | TF1           | 3629.0   |
| dof         | 0           | TFP           | 53.3     |
| dm          | nmn         | TP            | 0.6      |
| decwave     | W40_5mm3G1~ | TP            | 0.6      |
| dpwr        | 47          | WC            | 250      |
| dmf         | 32258       | SC            | 0        |
|             |             | VS            | 30       |
|             |             | th            | 2        |
|             |             | ai            | cdc      |
|             |             |               | ph       |

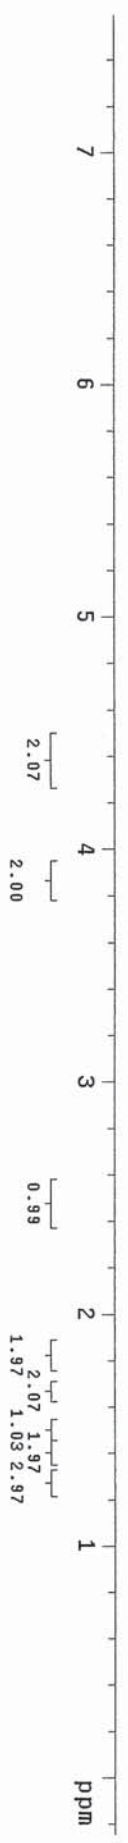

1cq2-200-13C  
exp25 CARBON

|             |             |            |          |          |
|-------------|-------------|------------|----------|----------|
| date        | Dec 16 2010 | SAMPLE     | temp     | not used |
| solvent     | cdc13       | cdc13      | gain     | 54       |
| file        | exp         | sp1n       | not used |          |
| ACQUISITION | 28258.6     | hst        | 0.008    |          |
| sw          | 1.300       | pw90       | 9.200    |          |
| at          | 73498       | alfa       | 10.000   |          |
| np          | 16000       | i1         | n        |          |
| fb          | 2           | in         | n        |          |
| d1          | 3.000       | dp         | y        |          |
| nt          | 10000       | hs         | nm       |          |
| ct          | 224         | PROCESSING | 0.50     |          |
| tn          | C13         | lb         | 1sfid    | 2        |
| stfq        | 125.702     | fn         | not used |          |
| tof         | 865.4       | DISPLAY    |          |          |
| tpwr        | 56          | sp         | -769.3   |          |
| pw          | 13.500      | wp         | 22791.9  |          |
| DECOUPLER   | H1          | rfl        | 11010.9  |          |
| dn          | 0           | rfp        | 9678.0   |          |
| dof         | 0           | tp         | -58.1    |          |
| dm          | nmv         | tp         | -889.8   |          |
| decwave     |             | PLOT       |          |          |
| dpwr        | 36          | wc         | 250      |          |
| dmf         | 11101       | sc         | 0        |          |
| th          |             | vs         | 478      |          |
| ai          | cdc         | ph         | 3        |          |

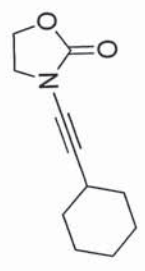

**13g**

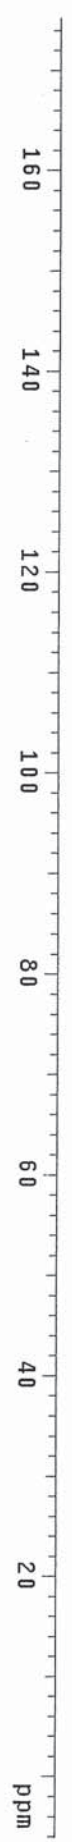

1c92-253

exp25 s2pu1

|                  |                |            |         |
|------------------|----------------|------------|---------|
| date             | Oct 28 2010    | dn         | H1      |
| solvent          | CdCl3          | dof        | -1425.0 |
| file             | /home/Zhang/C~ | dm         | mm      |
| q11/1c92-253.fid |                | dmm        | C       |
| ACQUISITION      |                | dmf        | 200     |
| sfrq             | 399.951        | PROCESSING |         |
| tn               | H1             | lb         | 0.10    |
| at               | 2.500          | fn         | 65536   |
| mp               | 35984          | math       | f       |
| sw               | 7198.8         |            |         |
| fb               | not used       | werr       |         |
| bs               | not used       | wexp       |         |
| pw               | 6.7            | wbs        |         |
| tpwr             | 57             | wnt        |         |
| d1               | 4.800          | sp         | -128.8  |
| tof              | -6.9           | wp         | 3287.2  |
| nt               | 10             | vs         | 57      |
| ct               | 10             | sc         | 0       |
| atlock           | n              | WC         | 250     |
| gain             | not used       | Hzmm       | 13.15   |
| fl               | n              | ls         | 770.72  |
| in               | n              | ft1        | 4502.0  |
| dp               | Y              | th         | 2903.6  |
| hs               | nm             | ins        | 35      |
| ai               | ai             | ph         | 2.000   |

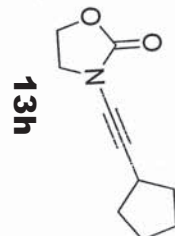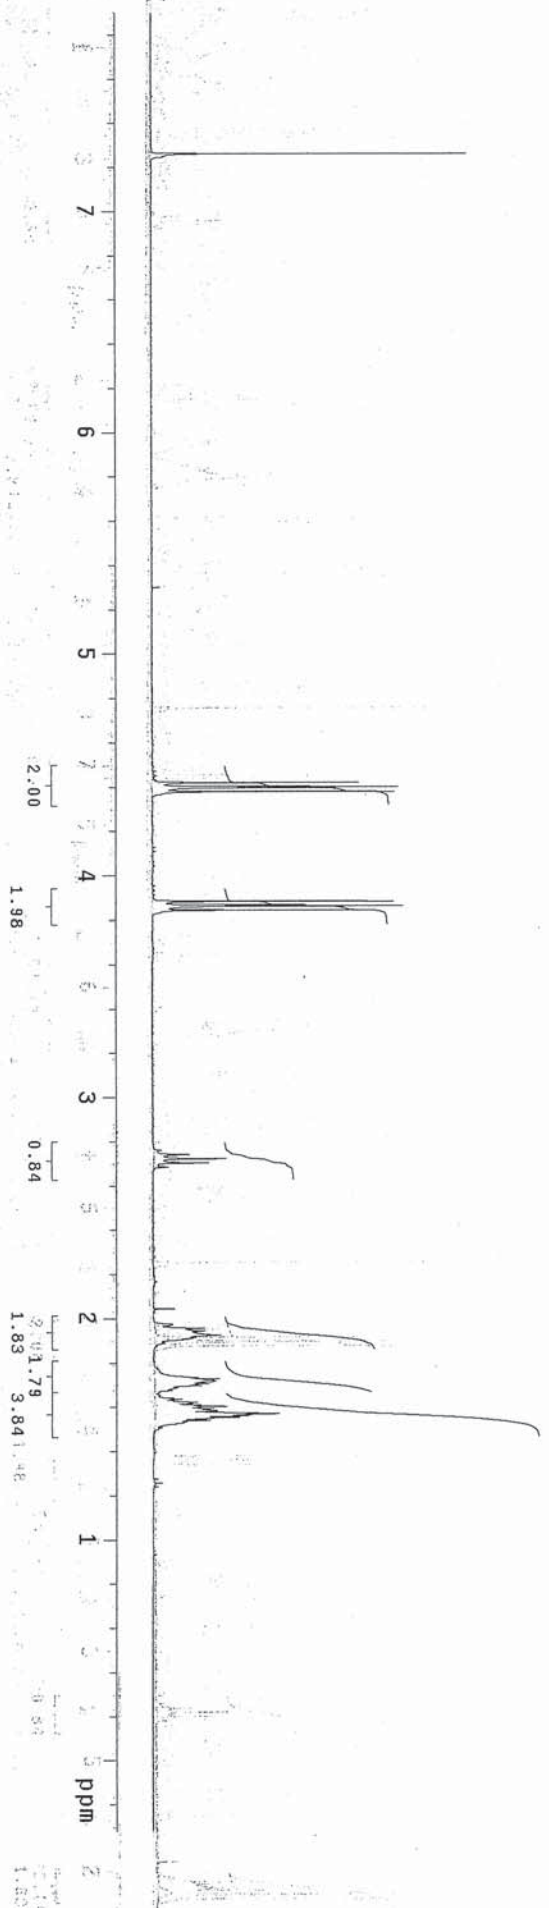

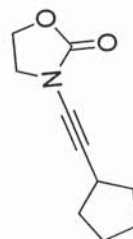

**13h**

1cq-2-253-C13  
 exp2 CARBON

|             |             |            |          |
|-------------|-------------|------------|----------|
| SAMPLE      | Dec 15 2010 | temp       | not used |
| solvent     | cdc13       | gain       | 54       |
| file        | exp         | spit       | 20       |
| ACQUISITION |             | hst        | 0.008    |
| sw          | 28258.6     | pw90       | 9.200    |
| at          | 1.300       | alfa       | 10.000   |
| np          | 73498       | FLAGS      |          |
| fb          | 16000       | i1         | n        |
| bs          | 4           | in         | n        |
| d1          | 3.000       | dp         | y        |
| nt          | 10000       | hs         | n        |
| ct          | 692         | PROCESSING | 0.50     |
| TRANSMITTER | C13         | lb         | 1sfid    |
| tn          | 125.702     | fn         | not used |
| sfrq        | 865.4       | sp         | DISPLAY  |
| tof         | 56          | wp         | -1334.6  |
| tpwr        | 13.500      | rfl        | 28258.1  |
| pw          |             | rfp        | 11013.1  |
| DECOUPLER   | H1          | tp         | 9678.0   |
| dn          | 0           | TP         | 8.5      |
| dof         | 0           | TP         | -942.7   |
| dm          | nmv         | PLOT       |          |
| decwave     |             | WC         | 250      |
| dpwr        | 36          | SC         | 0        |
| dmf         | 11101       | VS         | 502      |
|             |             | th         | 2        |
|             |             | ai         | cdc ph   |

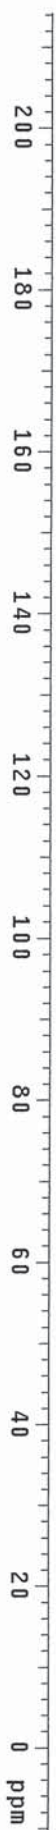

1c93-24-H

exp25 s2pu1

|             |             |      |            |        |
|-------------|-------------|------|------------|--------|
| date        | Dec 10 2010 | dn   | DEC. & VT  | C13    |
| solvent     | CDCl3       | dof  |            | 0      |
| file        | exp         | dm   |            | nmn    |
| ACQUISITION |             | dmm  |            | C      |
| sfrq        | 499.859     | dmf  | PROCESSING | 200    |
| tn          | H1          | 1b   | 0.20       |        |
| at          | 2.500       | fn   | 32768      | 1      |
| np          | 42518       | math |            |        |
| sw          | 8503.4      | werr |            |        |
| fb          | not used    | wexp |            |        |
| bs          | 2           | wbs  |            |        |
| pw          | 7.8         | wnt  |            |        |
| tpwr        | 7.8         | sp   | DISPLAY    | -181.1 |
| di          | 57          | wp   |            | 4166.6 |
| tof         | 4.800       | vs   |            | 38     |
| nt          | 16          | sc   |            | 0      |
| ct          | 16          | wc   |            | 250    |
| alock       | not used    | hzmm |            | 16.67  |
| gain        |             | ts   |            | 89.78  |
| il          | FLAGS       | rfl  |            | 5385.2 |
| in          | n           | rft  |            | 3629.0 |
| dp          | n           | th   |            | 2      |
| hs          | nm          | ins  |            | 3.000  |
|             |             | ph   |            |        |

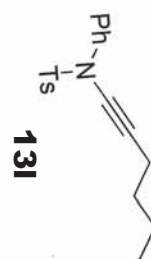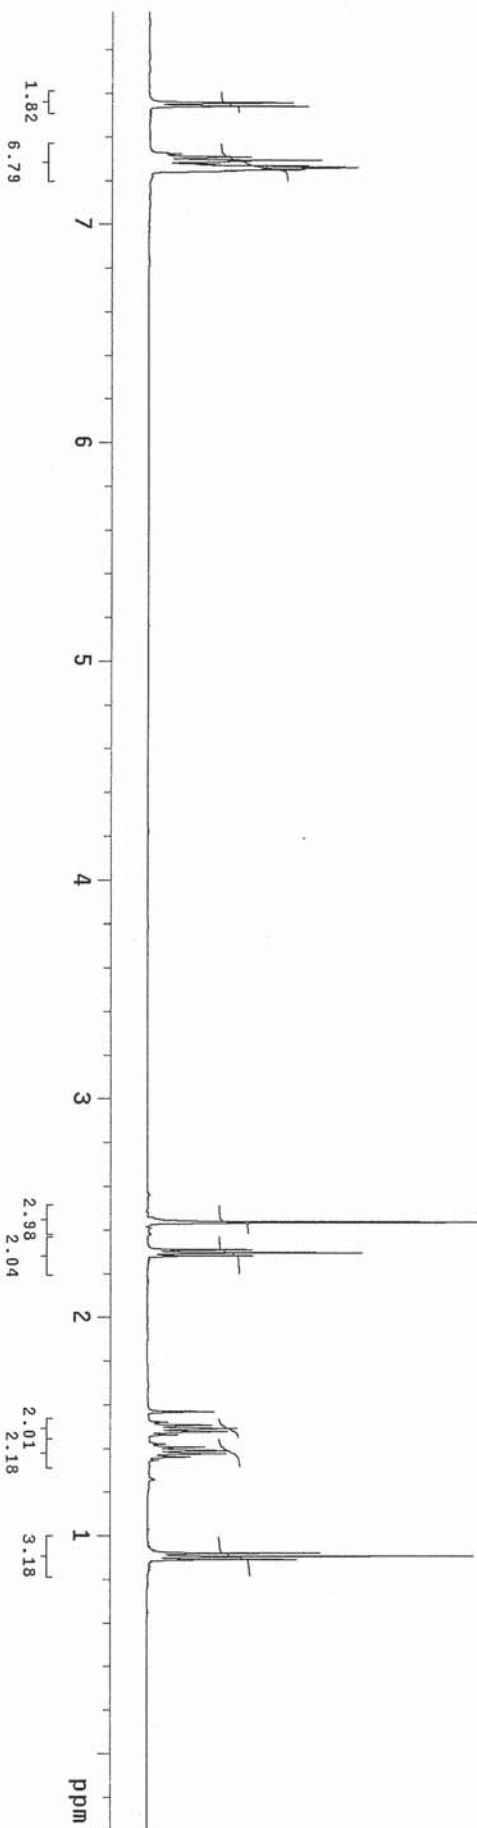



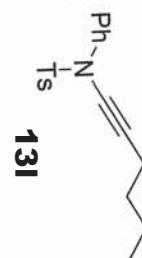

```

1c93-24-13C
exp25 CARBON

SAMPLE      SPECIAL
date      Dec 10 2010    temp    not used
solvent    cdc13             gain     54
file       exp          spin    not used
ACQUISITION 28258.6         hst      0.008
sw         1.300        pw90     9.200
at         73488        a1fa    10.000
np         16000         flags
fb         3.000         i1      n
bs         3.000         in      n
d1         10000        dp      y
nt         148         hs      nm
ct         148         hs      nm
TRANSMITTER C13          1b      0.50
            C13          1s      2
sfrq       125.702      fn      not used
tof        865.4       sp      DISPLAY
tpwr       56         wd      -231.6
pw         13.500      rf1     20804.1
DECOUPLER  H1          ffp    11036.3
dn         0          ffp    3678.0
dof        nny       tp      -108.2
dm         nny       tp      -929.3
decwawe
dpwr       36         WC      250
dmf        11101      SC      0
            ai      cdc   ph
            th      581
            ai      3

```

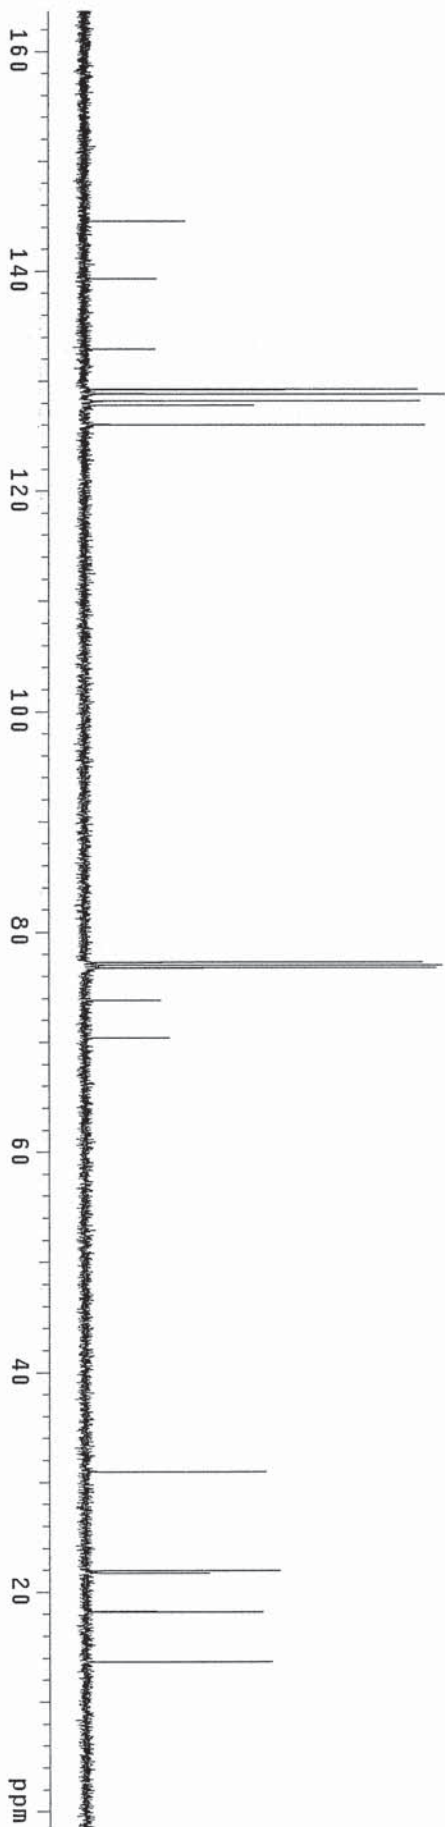

1c42-197

exp1 PROTON

|             |             |               |          |    |
|-------------|-------------|---------------|----------|----|
| SAMPLE      | Jan 14 2011 | PRESATURATION | satmode  | n  |
| solvent     | CDCl3       | wet           | wt       | n  |
| file        | exp         | SPECIAL       |          | n  |
| ACQUISITION |             | temp          | not used |    |
| sw          | 7997.6      | gain          | not used |    |
| at          | 2.049       | spin          | not used |    |
| np          | 32768       | hst           | 0.008    |    |
| fb          | 4000        | pw90          | 9.100    |    |
| bs          | 2           | atfa          | 6.500    |    |
| dl          | 1.000       | FLAGS         |          |    |
| nt          | 16          | i1            | n        |    |
| ct          | 16          | in            | n        |    |
| TRANSMITTER | H1          | dp            | y        |    |
| tn          | 499.859     | hs            | nn       |    |
| sfrq        | 499.859     | fn            | not used |    |
| tof         | 499.9       | DISPLAY       | not used |    |
| tpwr        | 53          | SP            | -234.6   |    |
| pw          | 4.550       | WP            | 4415.7   |    |
| DECOUPLER   | C13         | TT1           | 4632.4   |    |
| dn          | 0           | TFP           | 3629.0   |    |
| dof         | 0           | TP            | -121.2   |    |
| dm          | nnn         | PLT           | 1.7      |    |
| decwave     | W40_5mm3G1~ | WC            | 250      |    |
| dpwr        | 47          | SC            | 0        |    |
| dmf         | 32258       | VS            | 35       |    |
|             |             | th            | 1        |    |
|             |             | ai            | cdc      | ph |

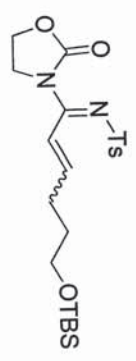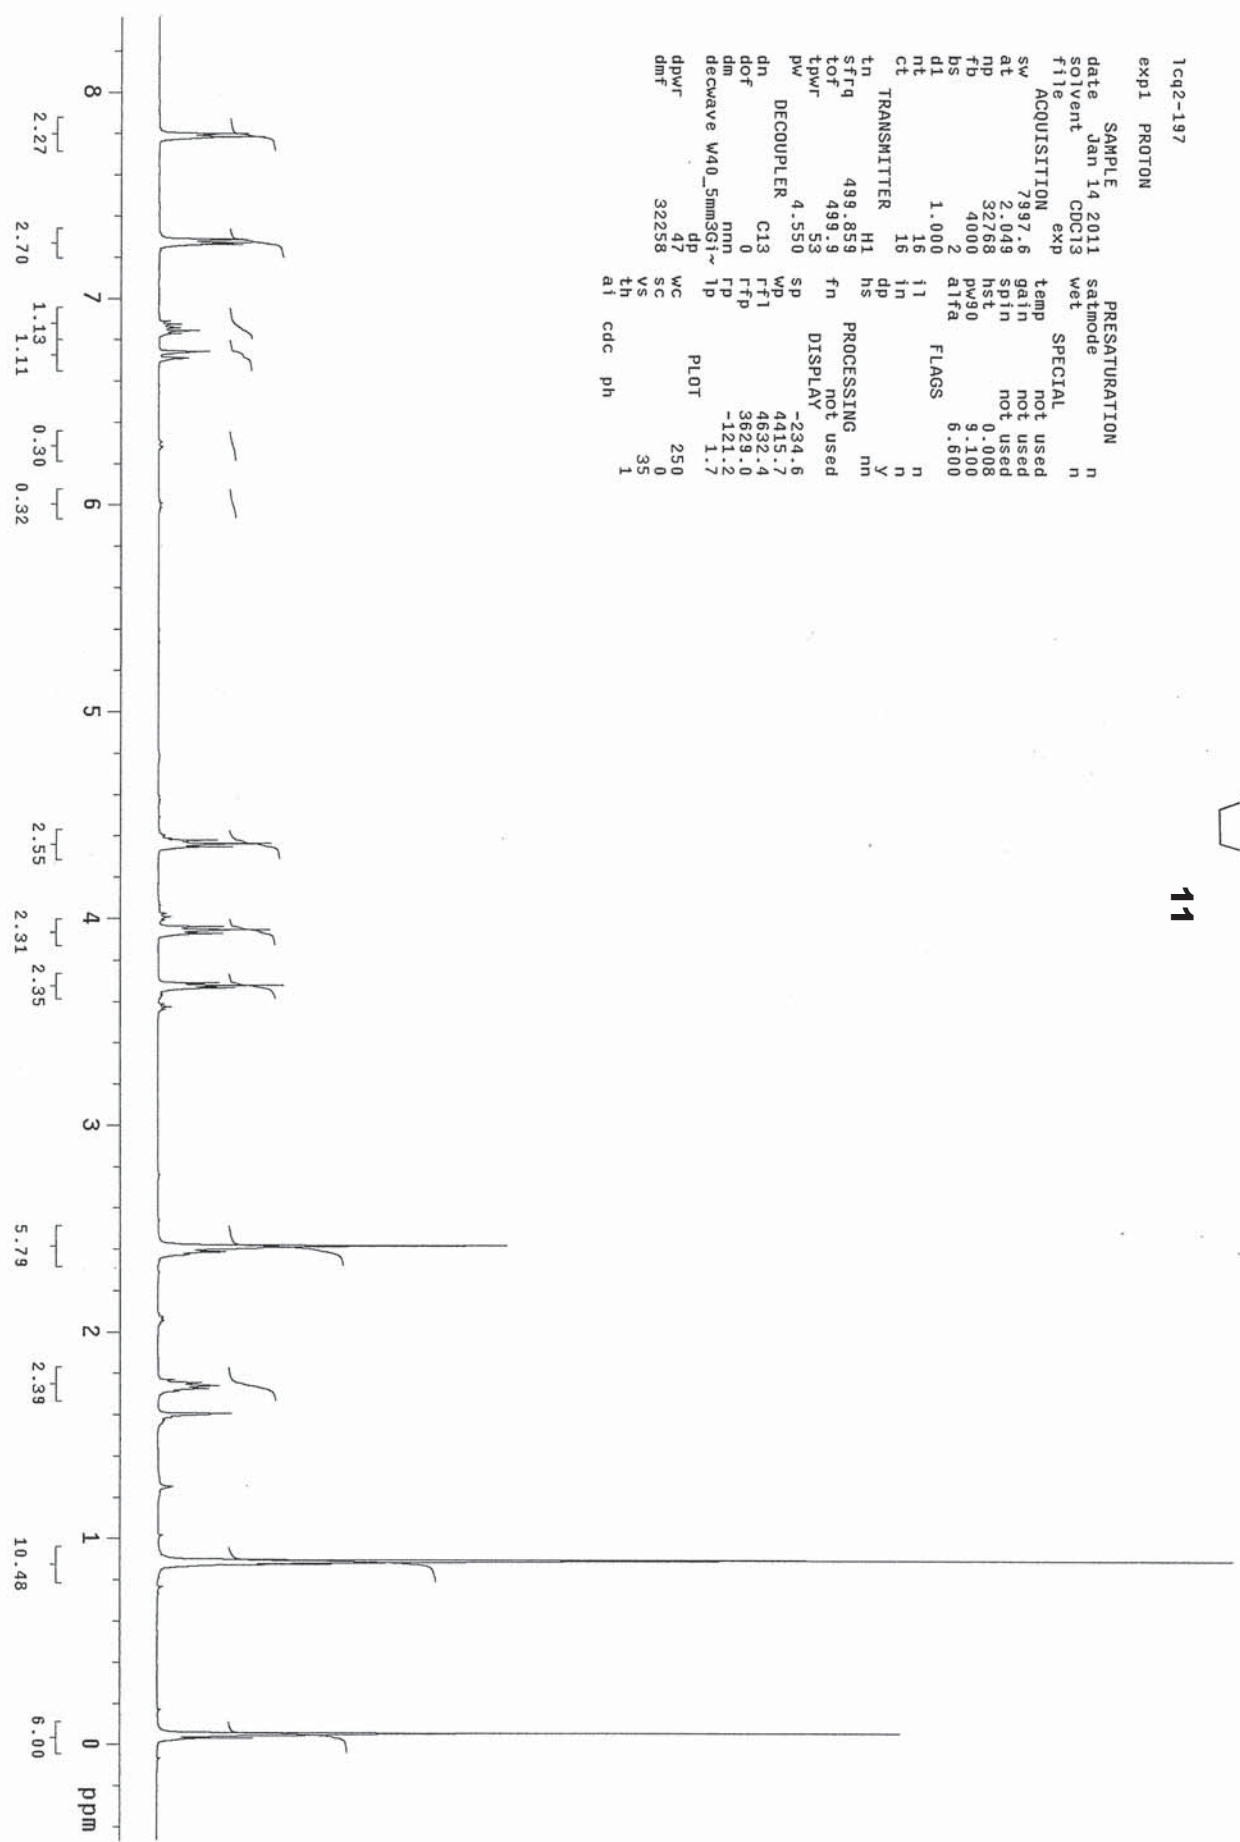

1c93-126-13C  
exp2 CARBON

|             |             |            |       |          |
|-------------|-------------|------------|-------|----------|
| date        | Dec 30 2010 | SAMPLE     | temp  | not used |
| solvent     | cdc13       | solvent    | gain  | 54       |
| file        | exp         | exp        | sp1n  | not used |
| ACQUISITION | 28258.6     | sw         | hst   | 0.008    |
| at          | 1.300       | at         | pw90  | 9.200    |
| np          | 73498       | np         | alfa  | 10.000   |
| fb          | 16000       | fb         | FLAGS |          |
| di          | 2           | di         | i1    | n        |
| nt          | 3.000       | nt         | in    | n        |
| ct          | 10000       | ct         | dp    | y        |
|             | 216         |            | hs    | nm       |
| TRANSMITTER |             | PROCESSING |       | 0.50     |
| tn          | C13         | 1b         | 1s    | fid      |
| stfq        | 125.702     | fn         |       | not used |
| lof         | 865.4       | sp         |       | DISPLAY  |
| tpwr        | 56          | wp         |       | -1224.6  |
| pw          | 13.500      | rf1        |       | 23686.2  |
| DECOUPLER   | H1          | rfp        |       | 11035.5  |
| dn          | 0           | tp         |       | 9678.0   |
| dof         | 0           | TP         |       | 30.0     |
| dm          | my          | TP         |       | -945.2   |
| decwave     |             | PLOT       |       |          |
| dpwr        | 36          | WC         |       | 250      |
| dmf         | 11101       | SC         |       | 0        |
|             |             | VS         |       | 1318     |
|             |             | th         |       | 0        |
|             |             | ai         | cdc   | ph       |
|             |             |            |       | 4        |

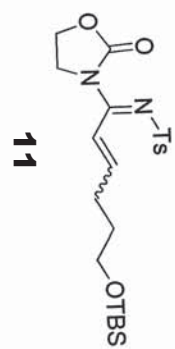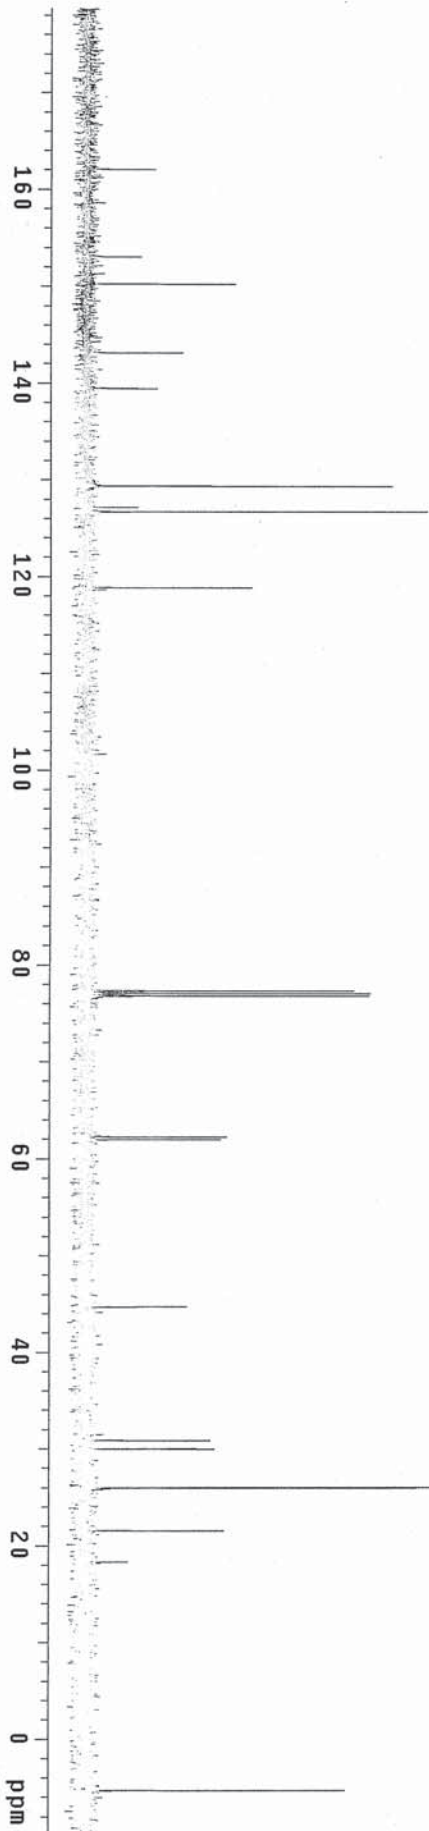

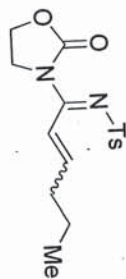

**14a**

1cq3-14-H  
 exp2 PROTON

|                    |                    |               |          |
|--------------------|--------------------|---------------|----------|
| SAMPLE             | Dec 30 2010        | PRESATURATION | n        |
| date               | Dec 30 2010        | satmode       | n        |
| solvent            | /home/Zhang/CDC13  | wet           | n        |
| f1le               | q1/1cq3-14-2-H-f1~ | temp          | not used |
| q1/1cq3-14-2-H-f1~ | d                  | gain          | not used |
| ACQUISITION        | 7997.6             | spn           | not used |
| sw                 | 2.049              | pw90          | 9.100    |
| at                 | 32788              | atfa          | 6.600    |
| np                 | 4000               | FLAGS         |          |
| fb                 | 2                  | f1            | n        |
| bs                 | 1.000              | in            | n        |
| d1                 | 16                 | dp            | y        |
| nt                 | 16                 | hs            | nm       |
| ct                 |                    | PROCESSING    | not used |
| tn                 | H1                 | fn            |          |
| TRANSMITTER        | H1                 | DISPLAY       | -131.1   |
| sfrq               | 499.859            | sp            | 4280.0   |
| tof                | 499.9              | wp            | 4651.9   |
| tpwr               | 53                 | rf1           | 3829.0   |
| pw                 | 4.550              | rfp           | 150.9    |
| DECOUPLER          | C13                | tp            | 3.4      |
| dn                 | 0                  | PLOT          |          |
| dof                | 0                  | WC            | 250      |
| dm                 | nm                 | dp            | 0        |
| decwave            | W40_5mmSG1~        | vs            | 32       |
| dpwr               | 47                 | th            | 2        |
| dmf                | 32258              | ai            | cdc      |
|                    |                    | ph            |          |

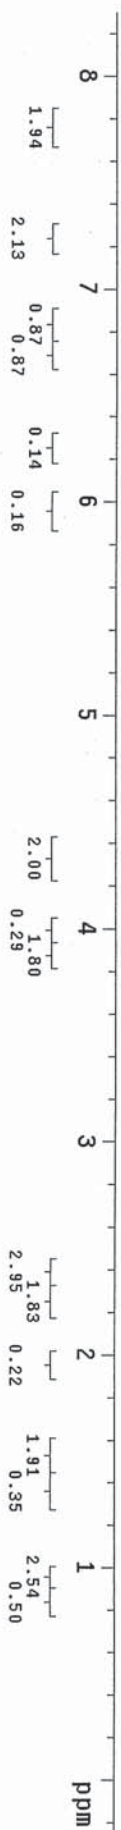

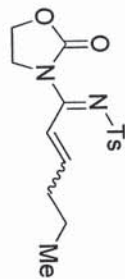

**14a**

```

1cq3-14a
exp2 CARBON

SAMPLE
date Nov 16 2010
solvent cdc13
file /home/Zhang/cv
q11/1cq3-14a13C.f1~

SPECIAL
temp not used
gain 54
spin not used
nst 0.008
pw90 9.200
atfa 10.000

ACQUISITION
sv 28258.6
at 1.300
mp 73498
fb 16000
bs 2
d1 3.000
nt 1000
ct 172

PROCESSING
lb 1.00
tsfid 2
fn not used

TRANSMITTER
tn C13
sfrq 125.702
tof 865.4
tpwr 56
pw 6.000

DECOUPLER
dn H1
dn dof 0
dm nny
decwve WC
dpwr 36
dmf 11101

DISPLAY
-194.1
21466.3
11094.1
9678.0
1.2
-938.3

PLOT
WC 250
SC 0
VS 1696
th 6
ai cdc ph

```

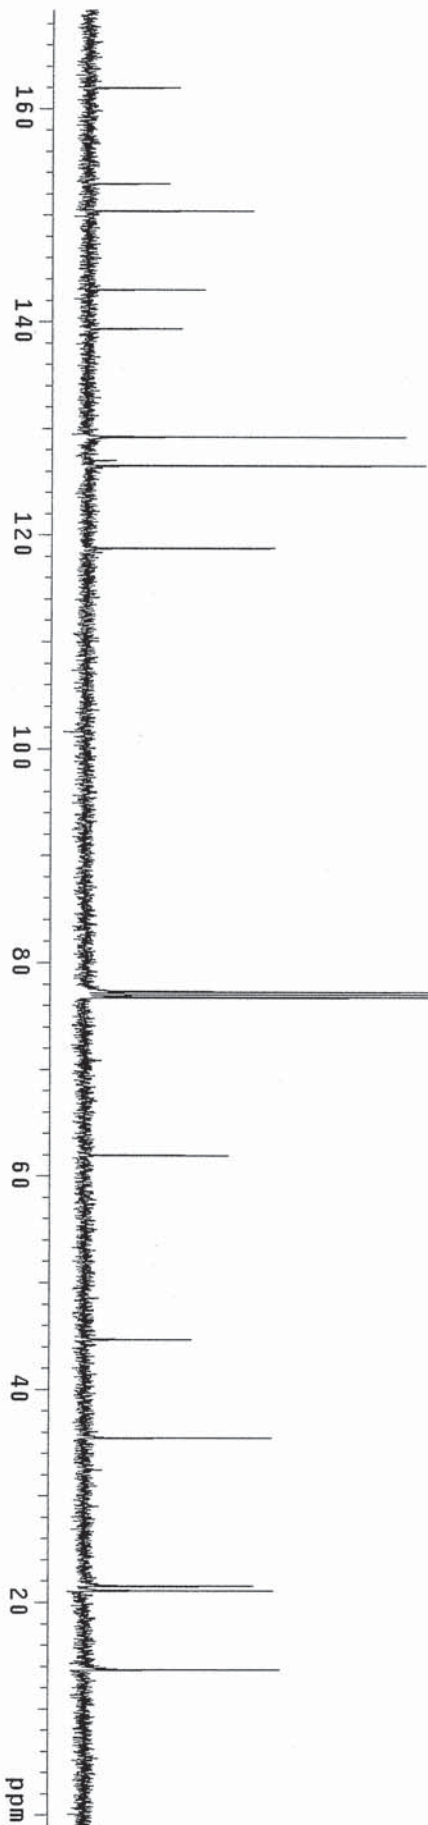

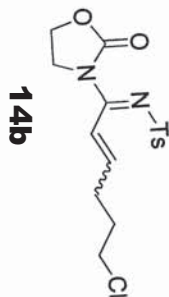

1c43-113  
 exp1 PROTON

|         |             |         |   |
|---------|-------------|---------|---|
| SAMPLE  | Jan 14 2011 | satmode | n |
| solvent | CDCl3       | wet     | n |
| file    | exp         | SPECIAL | n |

|             |             |            |          |
|-------------|-------------|------------|----------|
| ACQUISITION | temp        | not used   |          |
| sw          | 7997.6      | gain       | not used |
| at          | 2.049       | spin       | not used |
| np          | 32768       | hst        | 0.008    |
| fb          | 4000        | pw90       | 9.100    |
| bs          | 2           | atfa       | 6.500    |
| dl          | 1.000       | FLAGS      |          |
| nt          | 16          | i1         | n        |
| ct          | 16          | in         | n        |
| TRANSMITTER | dp          | hs         | y        |
| tn          | H1          | fn         | not used |
| sfrq        | 499.859     | PROCESSING |          |
| tof         | 499.9       | fn         | not used |
| tpwr        | 53          | DISPLAY    |          |
| pw          | 4.550       | SP         | -28.2    |
| DECOUPLER   | C13         | WP         | 4153.1   |
| dn          | 0           | TF1        | 4632.4   |
| dof         | 0           | TFP        | 3629.0   |
| dm          | nmn         | TP         | -126.0   |
| decwave     | W40_5mm3G1~ | PL0T       |          |
| dpwr        | 47          | WC         | 250      |
| dmf         | 32258       | SC         | 0        |
|             |             | VS         | 71       |
|             |             | th         | 2        |
|             |             | ai         | cdc      |
|             |             |            | ph       |

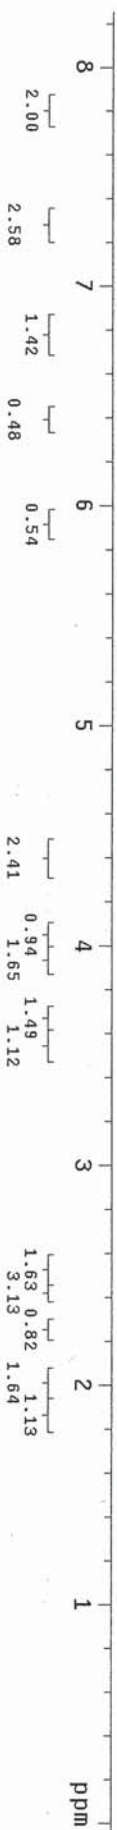

1c93-113-13C  
exp2 CARBON

|             |           |             |          |          |
|-------------|-----------|-------------|----------|----------|
| SAMPLE      | date      | Dec 28 2010 | temp     | not used |
| solvent     | cdc13     | gain        | 54       |          |
| file        | exp       | spin        | not used |          |
| ACQUISITION | sw        | 28258.6     | pw90     | 0.008    |
| at          | 1.300     | atfa        | 10.000   |          |
| np          | 73498     |             |          |          |
| fb          | 16000     |             |          |          |
| bs          | 2         |             |          |          |
| d1          | 3.000     |             |          |          |
| nt          | 10000     |             |          |          |
| ct          | 216       |             |          |          |
| TRANSMITTER | C13       | 1b          | 0.50     |          |
| tn          | 125.702   | fn          | not used |          |
| sfrq        | 865.4     | sfid        | not used |          |
| tof         | 56        | DISPLAY     | -265.7   |          |
| tpwr        | 13.500    | wd          | 21800.9  |          |
| pw          | DECOUPLER | rf1         | 11004.0  |          |
| dn          | H1        | rffp        | 96781.0  |          |
| dof         | 0         | tp          | -866.5   |          |
| dm          | mny       | PLOT        | 250      |          |
| deconvave   |           | vc          | 0        |          |
| dpwr        | 11101     | sc          | 1695     |          |
| dmf         |           | th          | 4        |          |
|             |           | ai          | cdc ph   |          |

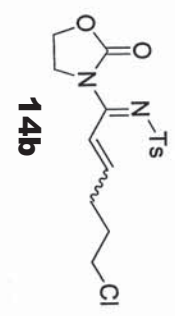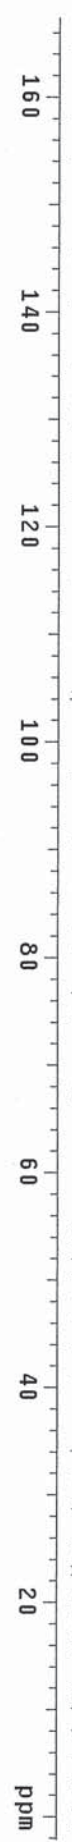

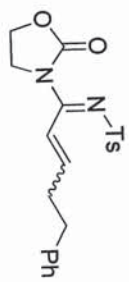

1c93-78  
 exp1 PROTON

|             |             |             |               |          |   |
|-------------|-------------|-------------|---------------|----------|---|
| SAMPLE      | date        | Jan 16 2011 | PRESATURATION | satmode  | n |
| solvent     | file        | CDC13       | wet           |          | n |
| ACQUISITION | exp         |             | SPECIAL       |          |   |
| sw          | 7997.6      | temp        | gain          | not used |   |
| at          | 2.049       | spin        | not used      |          |   |
| np          | 32768       | hsf         | 0.008         |          |   |
| fb          | 4000        | pw90        | 9.100         |          |   |
| bs          | 2           | atfa        | 8.600         |          |   |
| di          | 1.000       | flags       |               |          |   |
| nt          | 16          | i1          | n             |          |   |
| ct          | 16          | i2          | n             |          |   |
| TRANSMITTER | hs          | dp          | y             |          |   |
| tn          | H1          | fn          | nm            |          |   |
| sfrq        | 499.859     | PROCESSING  |               |          |   |
| tof         | 499.9       | not used    |               |          |   |
| tpwr        | 53          | DISPLAY     |               |          |   |
| pw          | 4.550       | SP          | -46.2         |          |   |
| DECOUPLER   | WD          | WT          | 4171.6        |          |   |
| dn          | G13         | FT1         | 4631.9        |          |   |
| dof         | 0           | rTp         | 3629.0        |          |   |
| dm          | nnn         | rp          | -121.0        |          |   |
| decwawe     | W40_5mm3G1~ | TP          | 1.2           |          |   |
| dpvr        | 47          | WC          | 250           |          |   |
| dmf         | 32258       | SC          | 0             |          |   |
|             |             | VS          | 13            |          |   |
|             |             | th          | 7             |          |   |
|             |             | ai          | cdc           |          |   |
|             |             |             | ph            |          |   |

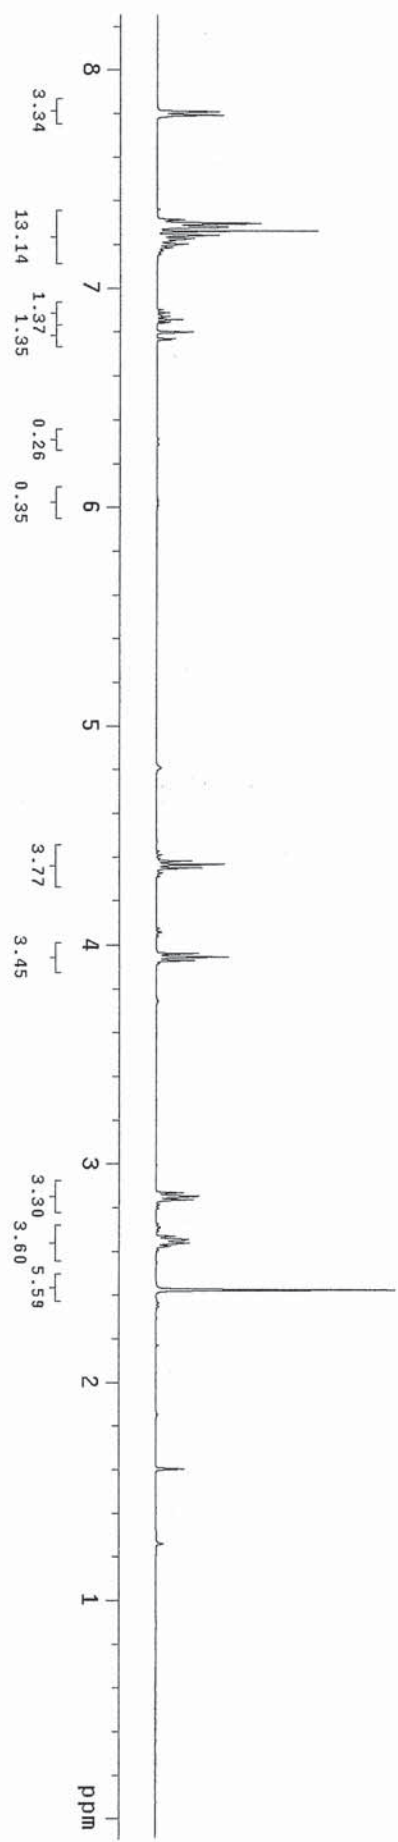



1c43-78

exp2 CARBON

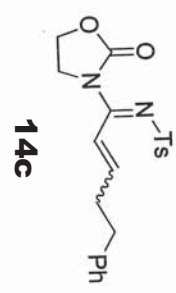

|             |             |            |          |
|-------------|-------------|------------|----------|
| SAMPLE      | Dec 7 2010  | temp       | not used |
| solvent     | cdcl3       | gain       | 54       |
| file        | exp         | spin       | not used |
| ACQUISITION | 28258.6     | hst        | 0.008    |
| sw          | 1.300       | pw90       | 9.200    |
| at          | 73498       | atfa       | 10.000   |
| np          | 16000       | FLAGS      | n        |
| fb          | 2           | in         | n        |
| bs          | 3.000       | dp         | y        |
| dl          | 10000       | hs         | nm       |
| nt          | 472         | PROCESSING | 0.50     |
| ct          | TRANSMITTER | lb         | 1sfid    |
| in          | C13         | fn         | not used |
| sfreq       | 125.702     | DISPLAY    | -438.1   |
| tof         | 865.4       | SP         | 22613.0  |
| tpwr        | 56          | WP         | 11040.7  |
| PW          | 13.500      | RF1        | 9678.0   |
| DECOUPLER   | H1          | TFP        | -9.3     |
| dn          | 0           | TP         | -951.9   |
| dof         | nny         | PLOT       | 250      |
| dm          | 0           | WC         | 0        |
| decwave     |             | SC         | 1695     |
| dpwr        | 36          | VS         | 2        |
| dmf         | 11101       | TH         |          |
|             |             | AI         | cdc ph   |

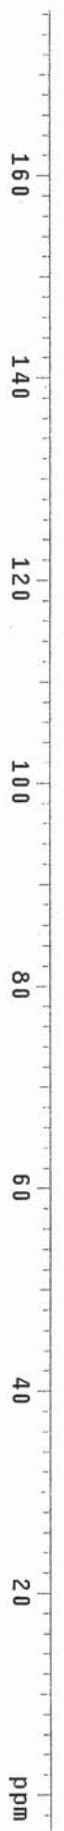

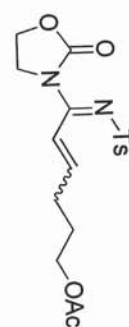

1c43-101  
 exp1 PROTON

SAMPLE date Jan 16 2011  
 solvent CDC13

ACQUISITION  
 file exp  
 sw 7997.6 gain not used  
 at 2.049 sp1n not used  
 np 32758 hsf 0.008  
 fd 4000 pw30 9.100  
 bs 2 dtfa 6.000  
 dl 1.000

TRANSITTER  
 tn H1  
 sfra 499.859 fn not used  
 tof 499.9  
 tpwr 53

DECOUPLER C13  
 dn 0  
 dof nnn  
 dm nnn  
 decwave W40\_5mm3G1~

PLLOT  
 dpwr 47 WC 250  
 dmf 32258 VS 0  
 th ai cdc ph 60  
 3

PRESATURATION  
 satmode n  
 wet n  
 SPECIAL  
 temp not used  
 gain not used  
 sp1n not used  
 hsf 0.008  
 pw30 9.100  
 dtfa 6.000

FLAGS  
 i1 n  
 i2 n  
 i3 n  
 i4 n  
 i5 n  
 i6 n  
 i7 n  
 i8 n  
 i9 n  
 i10 n  
 i11 n  
 i12 n  
 i13 n  
 i14 n  
 i15 n  
 i16 n  
 i17 n  
 i18 n  
 i19 n  
 i20 n  
 i21 n  
 i22 n  
 i23 n  
 i24 n  
 i25 n  
 i26 n  
 i27 n  
 i28 n  
 i29 n  
 i30 n  
 i31 n  
 i32 n  
 i33 n  
 i34 n  
 i35 n  
 i36 n  
 i37 n  
 i38 n  
 i39 n  
 i40 n  
 i41 n  
 i42 n  
 i43 n  
 i44 n  
 i45 n  
 i46 n  
 i47 n  
 i48 n  
 i49 n  
 i50 n  
 i51 n  
 i52 n  
 i53 n  
 i54 n  
 i55 n  
 i56 n  
 i57 n  
 i58 n  
 i59 n  
 i60 n  
 i61 n  
 i62 n  
 i63 n  
 i64 n  
 i65 n  
 i66 n  
 i67 n  
 i68 n  
 i69 n  
 i70 n  
 i71 n  
 i72 n  
 i73 n  
 i74 n  
 i75 n  
 i76 n  
 i77 n  
 i78 n  
 i79 n  
 i80 n  
 i81 n  
 i82 n  
 i83 n  
 i84 n  
 i85 n  
 i86 n  
 i87 n  
 i88 n  
 i89 n  
 i90 n  
 i91 n  
 i92 n  
 i93 n  
 i94 n  
 i95 n  
 i96 n  
 i97 n  
 i98 n  
 i99 n  
 i100 n

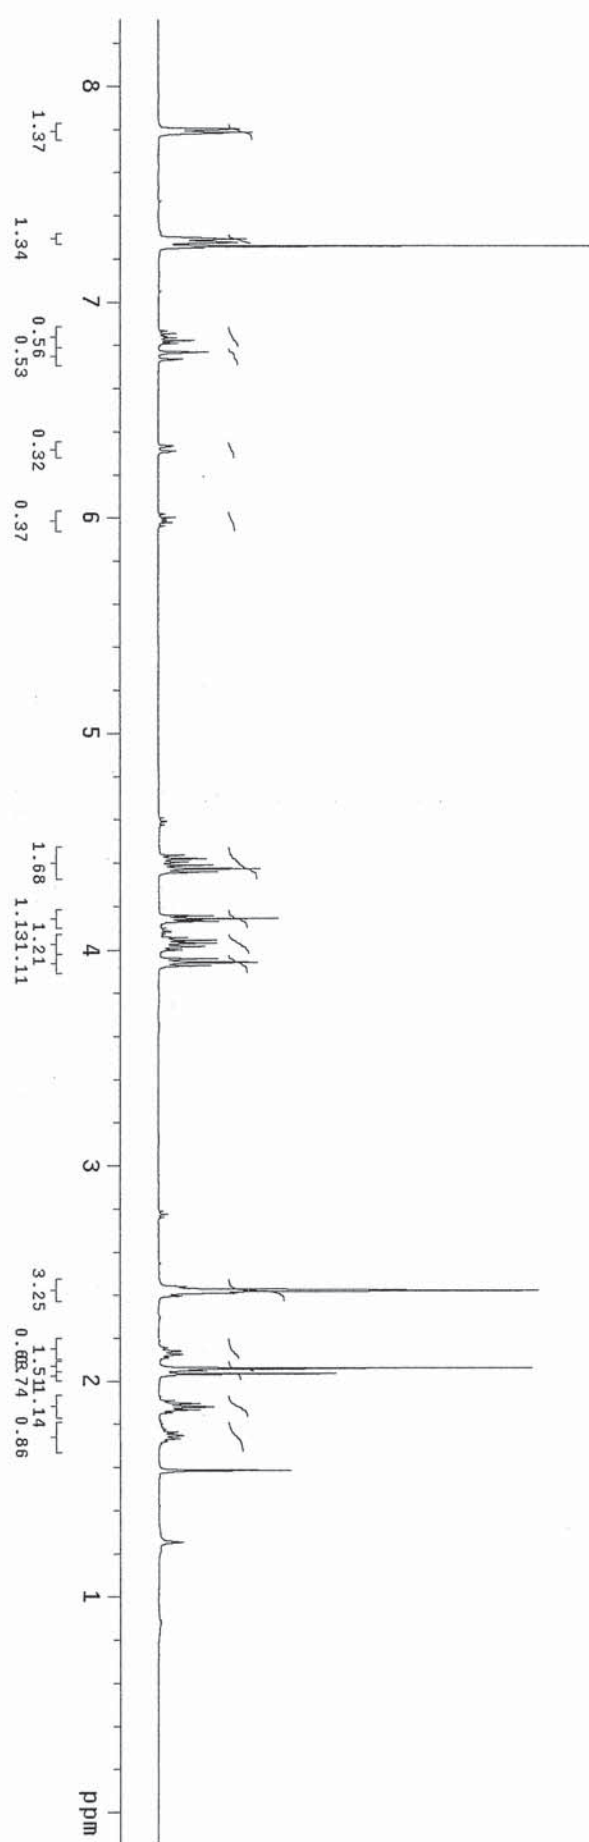

1cq-1-217-C13

exp2 CARBON

|             |         |             |            |          |          |
|-------------|---------|-------------|------------|----------|----------|
| SAMPLE      | date    | Dec 28 2010 | SPECIAL    | temp     | not used |
| solvent     | cdc13   |             | gain       | 54       |          |
| file        | exp     |             | spin       | not used |          |
| ACQUISITION | sw      | 28258.6     | hst        | 0.008    |          |
| at          | 1.300   |             | pw90       | 9.200    |          |
| np          | 73498   |             | atfa       | 10.000   |          |
| fb          | 16000   |             | FLAGS      |          |          |
| bs          | 2       |             | i1         | n        |          |
| di          | 3.000   |             | in         | n        |          |
| nt          | 10000   |             | dp         | y        |          |
| ct          | 174     |             | hs         | nn       |          |
| TRANSMITTER | 1b      | 0.50        | PROCESSING |          |          |
| tn          | G13     |             | fn         | not used |          |
| sfrq        | 125.702 |             | tsfid      | 2        |          |
| tof         | 865.4   |             | DISPLAY    |          |          |
| tpwr        | 56      |             | sp         | -67.7    |          |
| pw          | 13.500  |             | wd         | 22328.0  |          |
| DECOUPLER   | H1      |             | rfl        | 11004.9  |          |
| dn          | 0       |             | rfd        | 9678.0   |          |
| dof         | 0       |             | tp         | 62.1     |          |
| dm          | mny     |             | ip         | -971.3   |          |
| decouple    |         |             | PLOT       |          |          |
| dpwr        | 36      |             | wc         | 250      |          |
| dmf         | 11101   |             | sc         | 0        |          |
|             |         |             | vs         | 1695     |          |
|             |         |             | th         | 5        |          |
|             |         |             | ai         | cdc ph   |          |

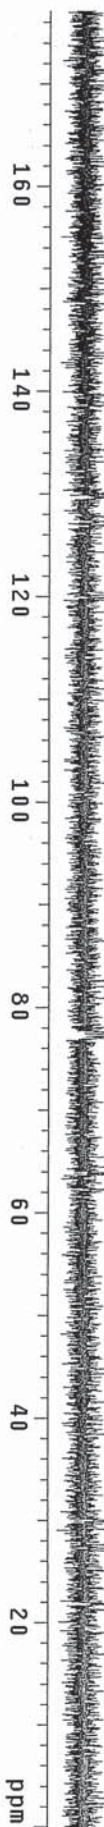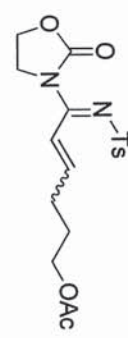

1c93-117  
 exp1 PROTON

SAMPLE

date Jan 16 2011  
 solvent CDCl3  
 file exp

ACQUISITION  
 sw 7997.6  
 at 2.049  
 np 32788  
 fb 4000  
 bs 2  
 ds 1.000  
 dl 16  
 nt 16  
 ct 16

TRANSMITTER  
 tn H1  
 sfreq 499.859  
 tof 499.9  
 tpwr 53

DECOUPLER  
 dn C13  
 dof 0  
 dm nnn  
 decwave W40\_5mm  
 SGI~ 1p

dpwr 47  
 dmf 32258

PRESATURATION  
 satmode n  
 wet n

SPECIAL  
 temp not used  
 gain not used  
 spin not used  
 hst 0.008  
 pw30 9.100  
 atfa 6.500

PROCESSING  
 not used  
 fn not used

DISPLAY  
 -121.9  
 4228.2  
 4632.4  
 3629.0  
 -124.1  
 -1.17

PLOT  
 250  
 0  
 47  
 2

ai cdc ph

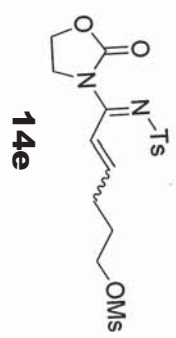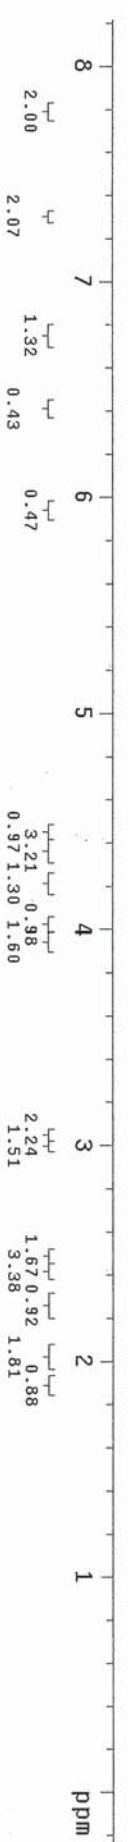

1cq3-117-13C  
exp2 CARBON

|             |             |            |          |          |
|-------------|-------------|------------|----------|----------|
| date        | Dec 30 2010 | SAMPLE     | temp     | not used |
| solvent     | cdcl3       | cdcl3      | gain     | 54       |
| file        | exp         | sp1n       | not used |          |
| ACQUISITION |             | hst        | 0.008    |          |
| sw          | 28258.6     | pw90       | 9.200    |          |
| at          | 1.300       | atfa       | 10.000   |          |
| np          | 73498       | flags      |          |          |
| fb          | 16000       | i1         | n        |          |
| bs          | 2           | in         | n        |          |
| d1          | 3.000       | dp         | y        |          |
| nt          | 10000       | hs         | nm       |          |
| ct          | 250         | PROCESSING | nm       |          |
| tn          | TRANSMITTER | 1b         | 0.50     |          |
| stfrq       | G13         | 1sfrid     | 2        |          |
| tof         | 125.702     | fn         | not used |          |
| tpwr        | 865.4       | DISPLAY    |          |          |
| pw          | 56          | sp         | -631.3   |          |
| DECOUPLER   | 13.500      | wp         | 22626.3  |          |
| dn          | H1          | rfl        | 11005.3  |          |
| dof         | 0           | rfd        | 9678.0   |          |
| dm          | ny          | tp         | 83.8     |          |
| decave      |             | tp         | -1014.7  |          |
| dpr         | 36          | WC         | 250      |          |
| dmf         | 11101       | SC         | 0        |          |
|             |             | VS         | 1911     |          |
|             |             | th         | 5        |          |
|             |             | at         | cdc ph   |          |

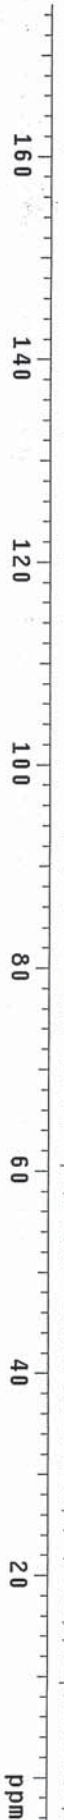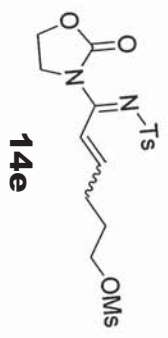

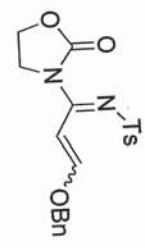

1c42-303-H  
exp25 s2pu1

|             |             |            |        |
|-------------|-------------|------------|--------|
| SAMPLE      | Dec 10 2010 | dn         | C13    |
| date        | Dec 10 2010 | dof        | 0      |
| solvent     | CDCl3       | dm         | mm     |
| file        | exp         | dmm        | c      |
| ACQUISITION | 499.859     | dmf        | 200    |
| sfrq        | H1          | PROCESSING | 0.20   |
| tn          | 2.500       | 1b         | 32768  |
| at          | 42518       | fn         | 1      |
| np          | 8503.4      | math       |        |
| sw          | not used    |            |        |
| fb          | 2           | werr       |        |
| bs          | 7.8         | wexp       |        |
| pw          | 7.8         | wbs        |        |
| tpwr        | 57          | wnt        |        |
| di          | 4.800       | sp         | -181.1 |
| tof         | 0           | wp         | 4425.6 |
| nt          | 16          | vs         | 73     |
| ct          | 16          | sc         | 0      |
| alock       | not used    | hzmm       | 250    |
| gain        |             | wc         | 0      |
| FLAGS       |             | is         | 17.70  |
| il          | n           | rs         | 259.57 |
| in          | n           | rfl        | 5385.2 |
| dp          | y           | rffp       | 3629.0 |
| hs          | nm          | th         | 3      |
|             |             | ins        | 2.000  |
|             |             | aj         |        |

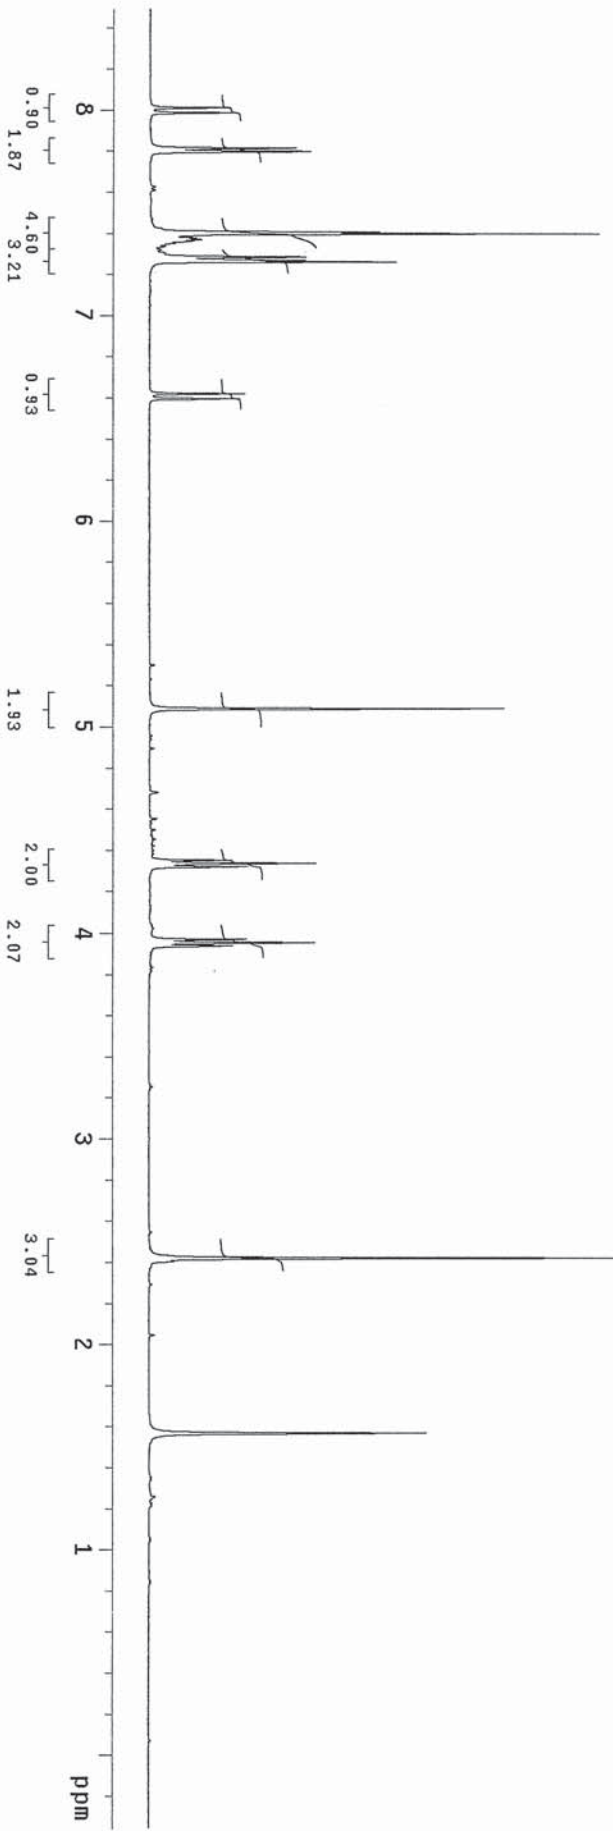

1c42-303-13C  
 exp25 CARBON

|             |             |            |          |
|-------------|-------------|------------|----------|
| date        | Dec 10 2010 | temp       | not used |
| solvent     | cdcl3       | gain       | 54       |
| file        | exp         | spin       | not used |
| ACQUISITION |             | hst        | 0.008    |
| sw          | 28258.6     | pw90       | 9.200    |
| at          | 1.300       | atfa       | 10.000   |
| np          | 73498       | FLAGS      |          |
| fb          | 16000       | i1         | n        |
| bs          | 4           | in         | n        |
| di          | 3.000       | dp         | y        |
| nt          | 10000       | hs         | nn       |
| ct          | 600         | PROCESSING |          |
| TRANSMITTER |             | lb         | 0.50     |
| tn          | C13         | 1sfid      | 2        |
| sfrq        | 125.702     | fn         | not used |
| lof         | 865.4       | DISPLAY    |          |
| tpwr        | 56          | SP         | -396.3   |
| pw          | 13.500      | WD         | 24050.6  |
| DECOUPLER   |             | rf1        | 11035.5  |
| dn          | H1          | rtp        | 9678.0   |
| dof         | 0           | tp         | -99.0    |
| dm          | nny         | TP         | -958.5   |
| decwvave    |             | PLOT       |          |
| dpwr        | 36          | wc         | 250      |
| dmf         | 11101       | sc         | 0        |
|             |             | vs         | 2557     |
|             |             | th         | 6        |
|             |             | ai         | cdc ph   |

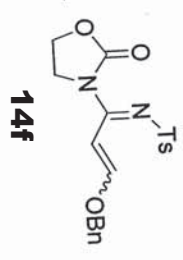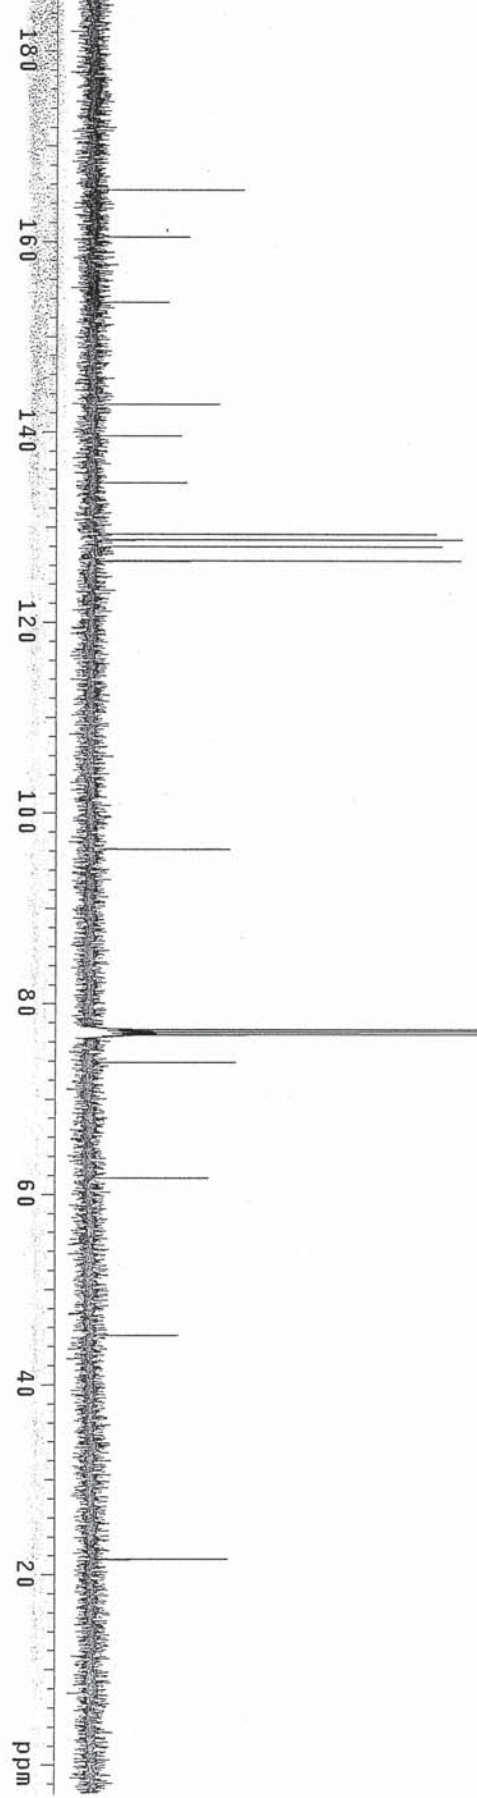

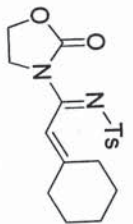

**149**

1c42-265-H  
 exp25 PROTON

|             |             |               |          |
|-------------|-------------|---------------|----------|
| SAMPLE      | Dec 27 2010 | PRESATURATION | n        |
| date        | Dec 27 2010 | satmode       | n        |
| solvent     | CDCl3       | wet           | n        |
| file        | exp         | SPECIAL       |          |
| ACQUISITION |             | temp          | not used |
| sw          | 7997.6      | gain          | not used |
| at          | 2.049       | spin          | not used |
| np          | 32788       | hst           | 0.008    |
| fb          | 4000        | pw90          | 9.100    |
| bs          | 2           | atfa          | 6.600    |
| d1          | 1.000       | FLAGS         |          |
| nt          | 12          | i1            | n        |
| ct          | 12          | in            | n        |
| TRANSMITTER | dp          | dp            | y        |
| tn          | H1          | hs            | nm       |
| sfrq        | 499.859     | fn            | not used |
| tof         | 499.9       | DISPLAY       |          |
| tpwr        | 53          | SP            | -159.0   |
| pw          | 4.550       | wp            | 4368.8   |
| DECOUPLER   | C13         | rfl           | 4363.1   |
| dn          | 0           | rfp           | 3629.0   |
| dof         | nm          | rp            | 157.1    |
| dm          | nm          | lp            | -1.3     |
| decwave     | W40_5mmSG1~ | PLOT          |          |
| dpwr        | 47          | wc            | 250      |
| dmf         | 32258       | sc            | 0        |
|             |             | vs            | 22       |
|             |             | th            | 4        |
|             |             | ai            | cdc      |
|             |             | ph            |          |

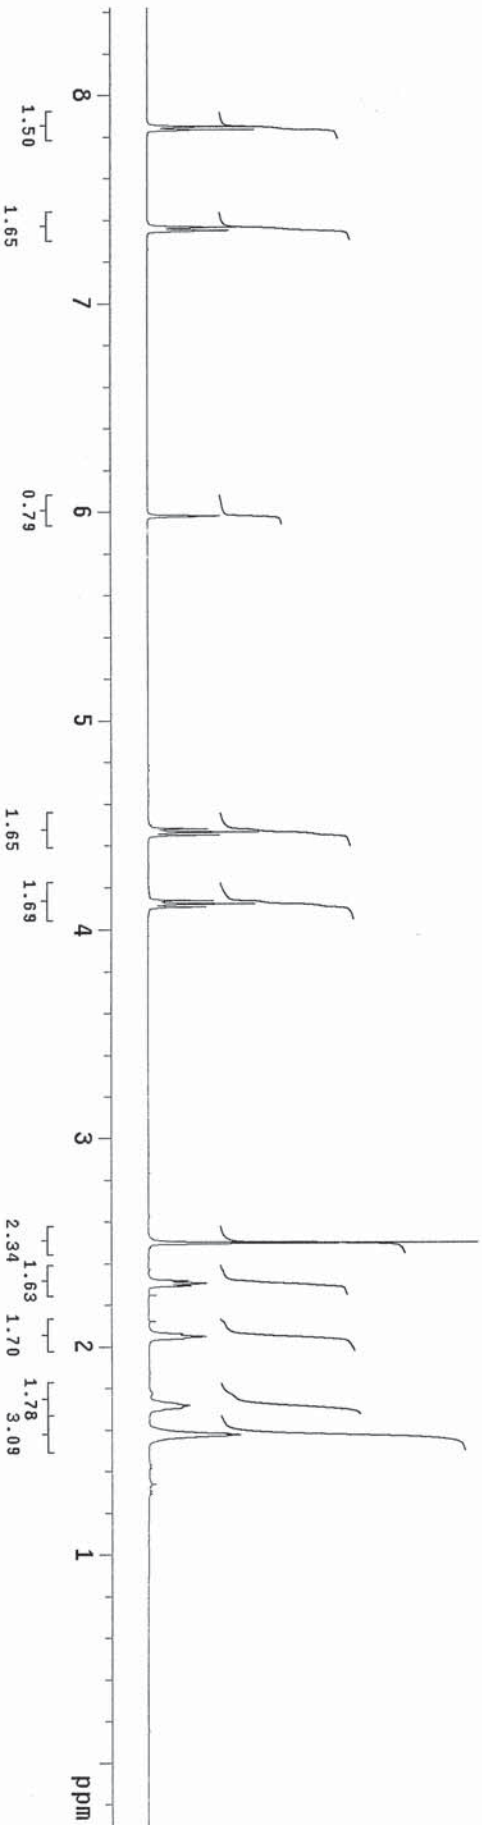



1c42-285-13C  
 exp25 CARBON

|             |             |            |          |
|-------------|-------------|------------|----------|
| SAMPLE      | Dec 27 2010 | temp       | not used |
| solvent     | cdcl3       | gain       | 54       |
| file        | exp         | spin       | not used |
| ACQUISITION | 28258.6     | hst        | 0.008    |
| sw          | 1.300       | pw90       | 9.200    |
| at          | 73498       | atfa       | 10.000   |
| np          | 16000       | FLAGS      |          |
| fb          | 2           | in         | n        |
| bs          | 3.000       | dp         | n        |
| di          | 10000       | hs         | y        |
| nt          | 296         | PROCESSING | nm       |
| ct          | TRANSMITTER | lb         | 0.50     |
| tn          | G13         | 1s         | fid      |
| sfreq       | 125.702     | fn         | not used |
| lof         | 865.4       | DISPLAY    |          |
| tpwr        | 56          | sp         | -668.4   |
| pw          | 13.500      | wp         | 23023.9  |
| DECOUPLER   | H1          | rf1        | 11042.4  |
| dn          | 0           | rfp        | 9676.0   |
| dof         | 0           | tp         | 29.8     |
| dm          | nmv         | 1p         | -928.8   |
| decwave     |             | PLOT       |          |
| dpwr        | 36          | wc         | 250      |
| dmf         | 11101       | sc         | 0        |
|             |             | vs         | 630      |
|             |             | th         | 4        |
|             |             | ai         | cdc ph   |

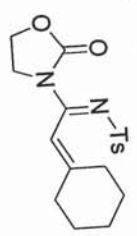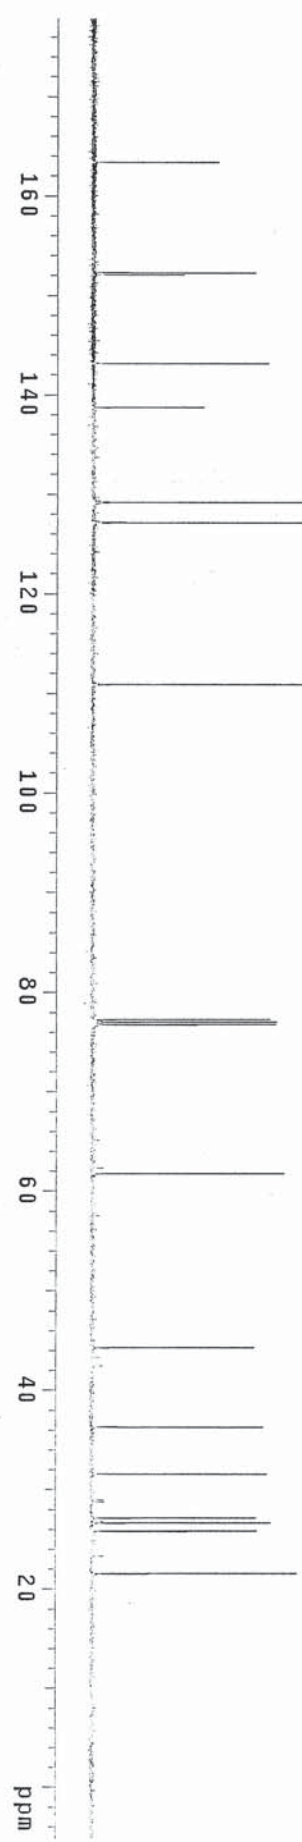

1cq2-266-2-H

exp25 PROTON

```
SAMPLE      PRESATURATION
date      Dec 28 2010      satmode      n
solvent    CDC13          wet          n
file       exp           SPECIAL      n
ACQUISITION
sw         7997.6        temp        not used
at         2.049        gain        not used
np         32768        spin        not used
fb         4000         hst         0.008
bs         2           pw90        9.100
d1         1.000        alfa        6.600
nt         16          FLAGS
ct         16          f1         n
TRANSMITTER H1         f2         n
sfreq      499.859      fn         y
tof         499.9      hs         m
tpwr       53         dp         y
pw         4.550      ds         y
DECOUPLER  C13         DISPLAY   -72.9
dn         0           wd         4331.2
dof        0           tf1        3844.6
dm         nmn        tfp        2990.1
decwave    W40_5mm3G1~ tp         156.1
dpcwr      dp         PLOT      2.7
dmf        47         wc         250
          32258      vs         0
          ai         th         41
          cdc      ph         1
```

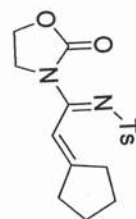

**14h**

(major)

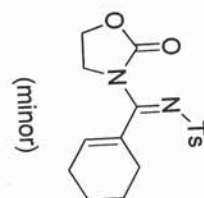

(minor)

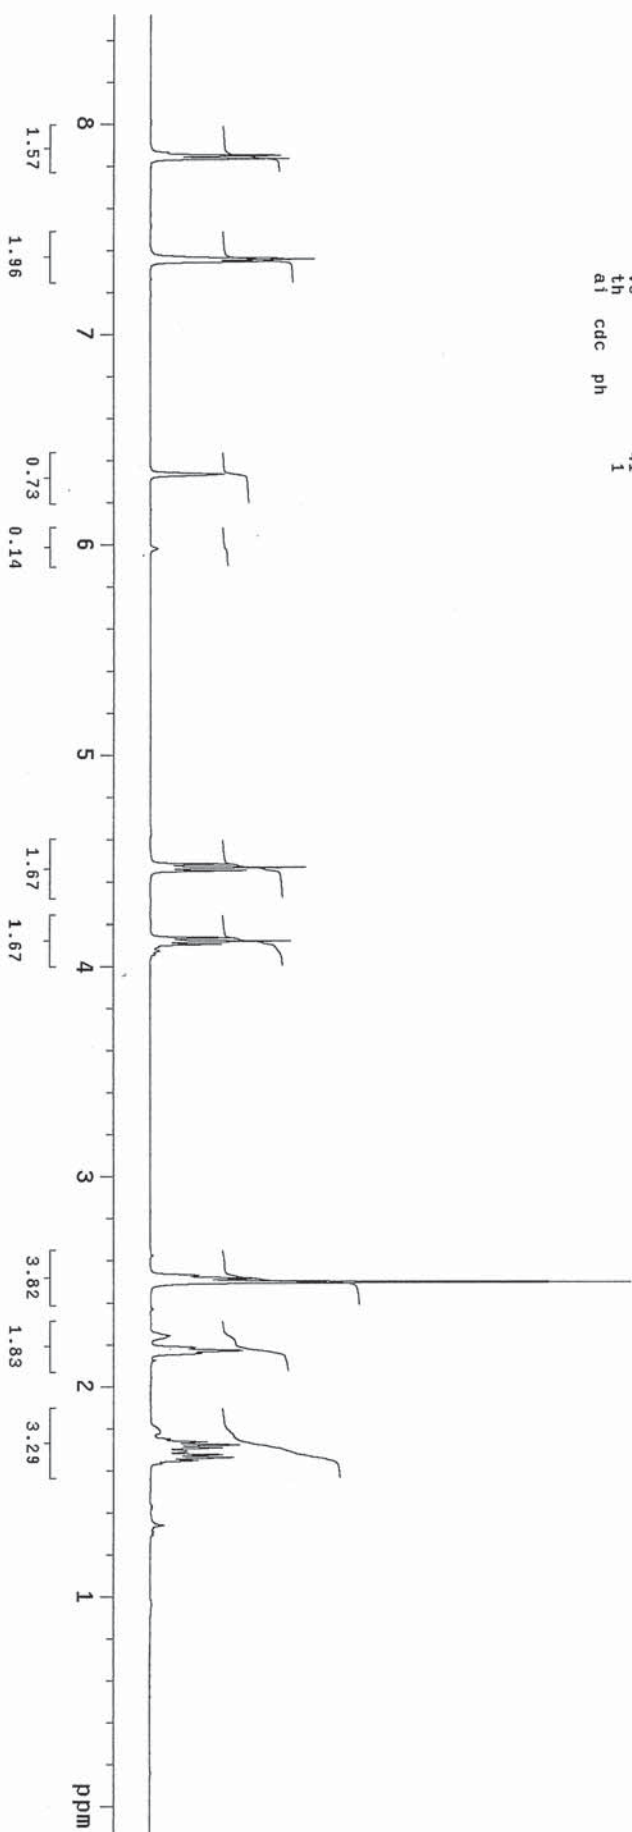

1cq2-266-13C  
exp25 CARBON

|             |             |         |            |          |
|-------------|-------------|---------|------------|----------|
| date        | Dec 27 2010 | SAMPLE  | temp       | not used |
| solvent     | cdcl3       | solvent | gain       | 54       |
| file        | exp         | file    | spin       | not used |
| ACQUISITION | 28258.6     | sw      | hst        | 0.008    |
| at          | 1.300       | at      | pw90       | 9.200    |
| np          | 73498       | atfa    | atfa       | 10.000   |
| fb          | 16000       | np      | flags      | n        |
| bs          | 2           | fb      | i1         | n        |
| d1          | 3.000       | bs      | in         | n        |
| nt          | 10000       | d1      | dp         | y        |
| ct          | 96          | nt      | hs         | nn       |
| TRANSMITTER | 96          | ct      | PROCESSING | nn       |
| tn          | C13         | tn      | lb         | 0.50     |
| stfq        | 125.702     | stfq    | lfrid      | 2        |
| tof         | 865.4       | tof     | fn         | not used |
| tpwr        | 56          | tpwr    | DISPLAY    | -337.7   |
| pw          | 13.500      | pw      | sp         | 21798.0  |
| DECOUPLER   | H1          | pw      | wd         | 11009.6  |
| dn          | 0           | dn      | rfl        | 9678.0   |
| dof         | 0           | dof     | rfp        | 9628.1   |
| dm          | ny          | dm      | tp         | -902.4   |
| deceive     |             | dm      | PLOT       |          |
| dpmf        | 36          | dpmf    | wc         | 250      |
|             | 11101       |         | sc         | 0        |
|             |             |         | vs         | 821      |
|             |             |         | th         | 4        |
|             |             |         | ai         | cdc ph   |

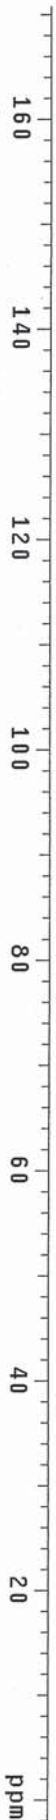

14h

(major)

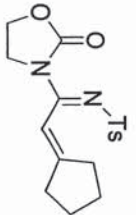

(minor)

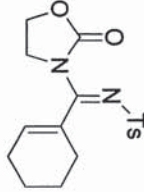

1cq2-242-H  
exp2 PROTON

|           |             |               |          |   |
|-----------|-------------|---------------|----------|---|
| date      | Dec 30 2010 | PRESATURATION | satmode  | n |
| solvent   | CDCl3       | wet           |          | n |
| file      | exp         | SPECIAL       |          |   |
| sw        | 7997.6      | temp          | not used |   |
| at        | 2.049       | gain          | not used |   |
| np        | 32758       | spin          | not used |   |
| fb        | 4000        | pw90          | 9.100    |   |
| bs        | 2           | atfa          | 6.600    |   |
| d1        | 1.000       | FLAGS         |          |   |
| nt        | 18          | i1            | n        |   |
| ct        | 16          | in            | n        |   |
| tn        | 18          | dp            | y        |   |
| tr        | 16          | hs            | nm       |   |
| tn        | H1          | fn            | not used |   |
| sfreq     | 499.859     | PROCESSING    |          |   |
| tof       | 499.9       | DISPLAY       |          |   |
| tpwr      | 53          |               |          |   |
| pw        | 4.550       | SP            | -113.1   |   |
| DECOUPLER | C13         | WP            | 4556.3   |   |
| dn        | 0           | rf1           | 4632.9   |   |
| dof       | 0           | rfp           | 3623.0   |   |
| dm        | nm          | tp            | 138.0    |   |
| decwave   | W40_5mm3G1~ | ip            | -8.6     |   |
| dpwr      | 47          | PLOT          |          |   |
| dmf       | 32258       | WC            | 250      |   |
|           |             | SC            | 0        |   |
|           |             | VS            | 21       |   |
|           |             | th            | 2        |   |
|           |             | ai            | cdc      |   |
|           |             |               | ph       |   |

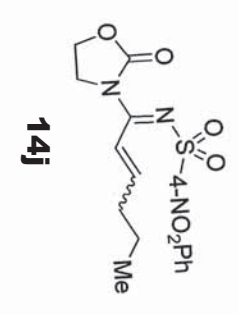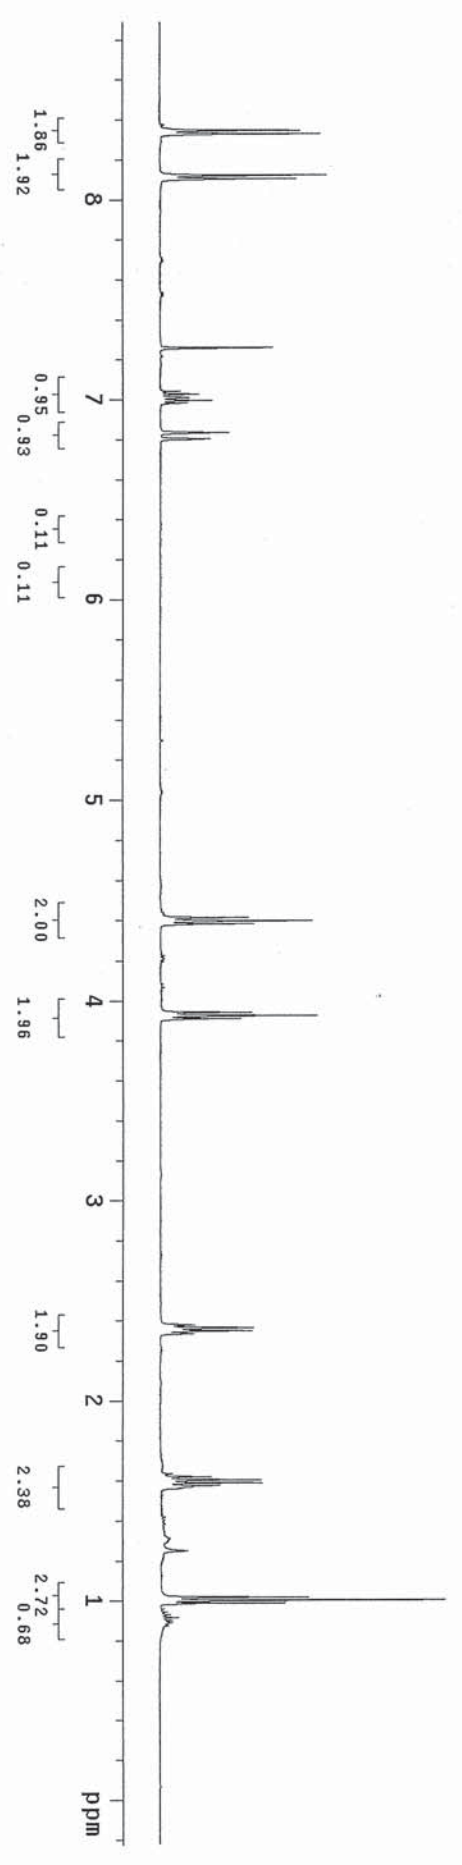

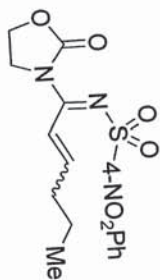

14j

1c92-242-13C  
 exp25 CARBON

|             |          |             |       |                 |
|-------------|----------|-------------|-------|-----------------|
| SAMPLE      | date     | Dec 27 2010 | temp  | not used        |
| SOLVENT     | solvent  | cdcl3       | gain  | 54              |
| FILE        | exp      |             | spin  | not used        |
| ACQUISITION | sw       | 28258.6     | hst   | 0.008           |
|             | at       | 1.300       | pw90  | 9.200           |
|             | np       | 73498       | atfa  | 10.000          |
|             | fb       | 16000       | flags |                 |
|             | bs       | 2           |       | n               |
|             | d1       | 3.000       | in    | n               |
|             | nt       | 10000       | dp    | y               |
|             | ct       | 524         | hs    | nn              |
| TRANSMITTER | tn       | C13         | lb    | PROCESSING 0.50 |
|             | sfreq    | 125.702     | lrfid | 2               |
|             | tof      | 865.4       | fn    | not used        |
|             | tpwr     | 56          | sp    | DISPLAY         |
|             | pw       | 13.500      | wd    | -1292.3         |
| DECOUPLER   | dn       | H1          | rf1   | 24613.7         |
|             | dof      | 0           | rfd   | 11003.6         |
|             | dm       | nmv         | tp    | 9678.0          |
|             | decouple |             |       | 18.8            |
|             | dpwr     | 36          | WC    | PLOT -924.6     |
|             | dmf      | 11101       | SC    | 250             |
|             |          |             | th    | 0               |
|             |          |             | ai    | 2504            |
|             |          |             |       | 3               |

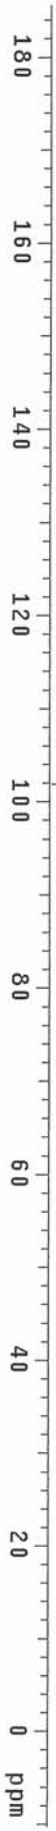

1c93-121-H  
exp25 s2pu1

|             |             |            |         |
|-------------|-------------|------------|---------|
| SAMPLE      | Dec 28 2010 | dn         | H1      |
| date        | Dec 28 2010 | dof        | -1425.0 |
| solvent     | cdcl3       | dm         | nm      |
| file        | exp         | dmf        | C       |
| ACQUISITION |             | dmf        | 200     |
| sfrq        | 399.951     | dmf        | 200     |
| in          | H1          | PROCESSING |         |
| at          | 2.502       | 1b         | 0.10    |
| np          | 36008       | fn         | 65536   |
| sw          | 7196.8      | math       | f       |
| fb          | not used    |            |         |
| bs          | not used    |            |         |
| pw          | 8.0         | weff       |         |
| weff        | 8.0         | weff       |         |
| pw          | 8.0         | wexp       |         |
| wexp        | 8.0         | wbs        |         |
| wbs         | 8.0         | wnt        |         |
| tpwr        | 57          |            |         |
| di          | 3.000       | DISPLAY    |         |
| sp          | -6.9        |            | -78.7   |
| nt          | 16          | wp         | 3396.4  |
| ct          | 16          | vs         | 72      |
| alock       | n           | sc         | 0       |
| gain        | not used    | vc         | 250     |
| h1          | n           | h1zmm      | 13.59   |
| in          | n           | h2         | 257.71  |
| dp          | n           | ft1        | 4504.2  |
| th          | nm          | rft1       | 2903.6  |
| ins         | nm          | th         | 1       |
| ai          | ns          | ins        | 2.000   |
|             |             | ph         |         |

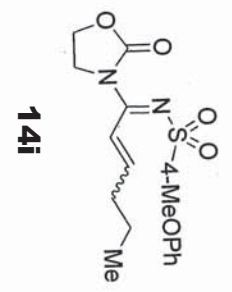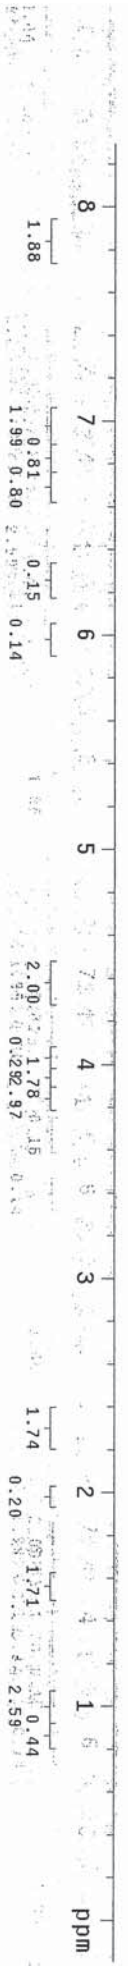

1c93-121-13C  
 exp2 CARBON

|             |             |            |            |          |
|-------------|-------------|------------|------------|----------|
| date        | Dec 28 2010 | SAMPLE     | temp       | not used |
| solvent     | cdcl3       | solvent    | gain       | 54       |
| file        | exp         | file       | spin       | not used |
| ACQUISITION | 23258.6     | sw         | hst        | 0.008    |
| at          | 1.300       | pw         | pw90       | 9.200    |
| np          | 73498       | atfa       | atfa       | 10.000   |
| fb          | 16000       | flags      | flags      | 10.000   |
| bs          | 3.000       | in         | in         | n        |
| di          | 3.000       | dp         | dp         | n        |
| nt          | 10000       | hs         | hs         | Y        |
| ct          | 100         | PROCESSING | PROCESSING | nn       |
| TRANSMITTER | 100         | lb         | lb         | 0.50     |
| tn          | C13         | tsfid      | tsfid      | 2        |
| sfrq        | 125.702     | fn         | fn         | not used |
| tof         | 865.4       | DISPLAY    | DISPLAY    | not used |
| tpwr        | 56          | SP         | SP         | -531.7   |
| pw          | 13.500      | WD         | WD         | 22328.0  |
| DECOUPLER   | H1          | RF1        | RF1        | 11009.9  |
| dn          | 0           | TFP        | TFP        | 9678.0   |
| dof         | 0           | TP         | TP         | 32.7     |
| dm          | nny         | PLOT       | PLOT       | -954.6   |
| deccave     |             | WC         | WC         | 250      |
| dpwr        | 36          | SC         | SC         | 0        |
| dmf         | 11101       | VS         | VS         | 819      |
|             |             | th         | th         | 0        |
|             |             | ai         | ai         | cdc ph   |

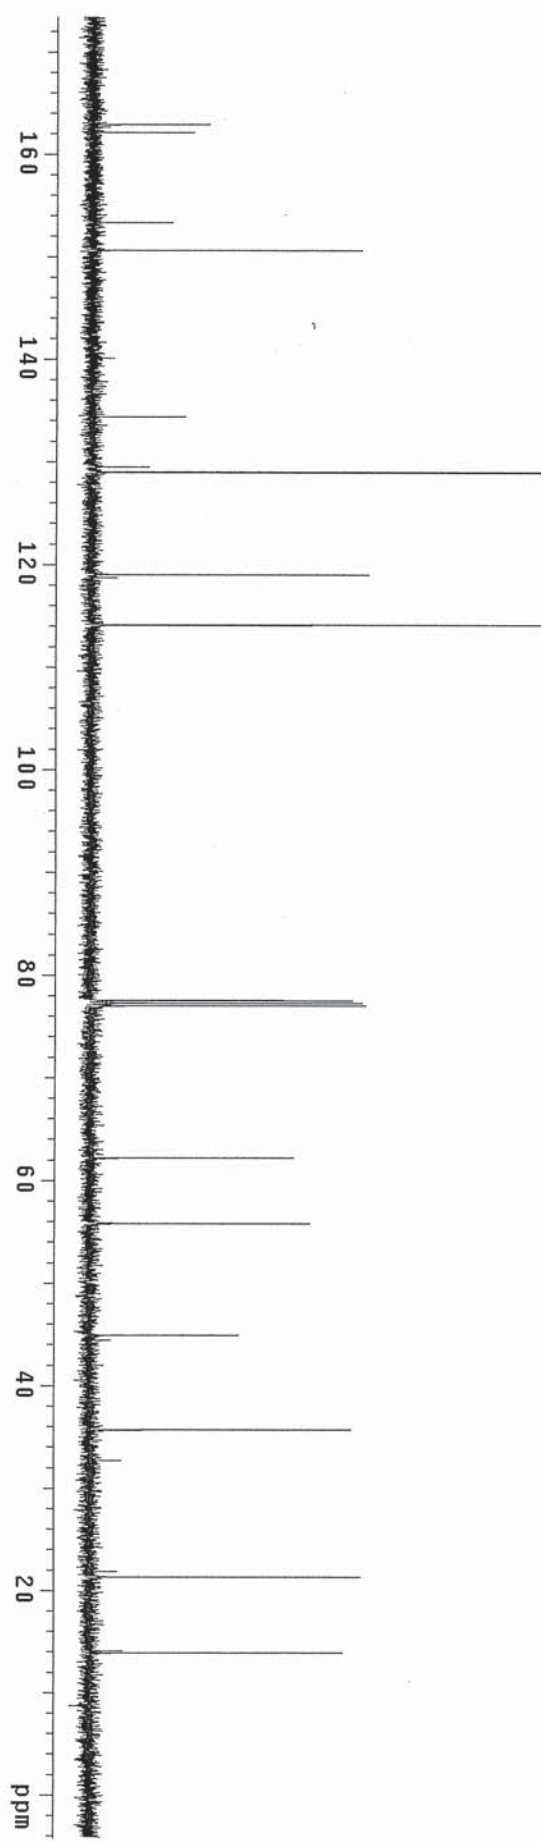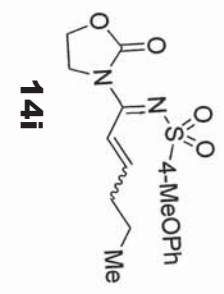

1cdq3-170b  
exp25 szpu1

|             |             |            |         |
|-------------|-------------|------------|---------|
| date        | Jan 18 2011 | dn         | G13     |
| solvent     | cdcl3       | dof        | -1425.0 |
| file        | exp         | dm         | nmn     |
| ACQUISITION |             | dmm        | C       |
| sfrq        | 399.951     | dmf        | 200     |
| in          | H1          | PROCESSING |         |
| at          | 2.500       | lb         | 0.20    |
| np          | 40016       | fn         | 65536   |
| sw          | 8003.2      | math       | j       |
| fb          | not used    |            |         |
| bs          | 2           | WEFT       |         |
| pw          | 11.7        | weXP       |         |
| tpwr        | 11.7        | wbs        |         |
| d1          | 60          | wnt        |         |
| tof         | 4.800       | sp         | -386.1  |
| nt          | 0           | wp         | 3674.1  |
| ct          | 16          | vs         | 17      |
| alock       | n           | sc         | 0       |
| gain        | not used    | WC         | 250     |
| FLAGS       |             | h2mm       | 14.70   |
| l1          | n           | ls         | 211.16  |
| l2          | n           | rfl        | 1994.5  |
| dp          | y           | rtp        | 0       |
| hs          | nm          | th         | 5       |
|             |             | ins        | 2.000   |
|             |             | ai         | ph      |

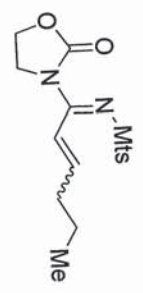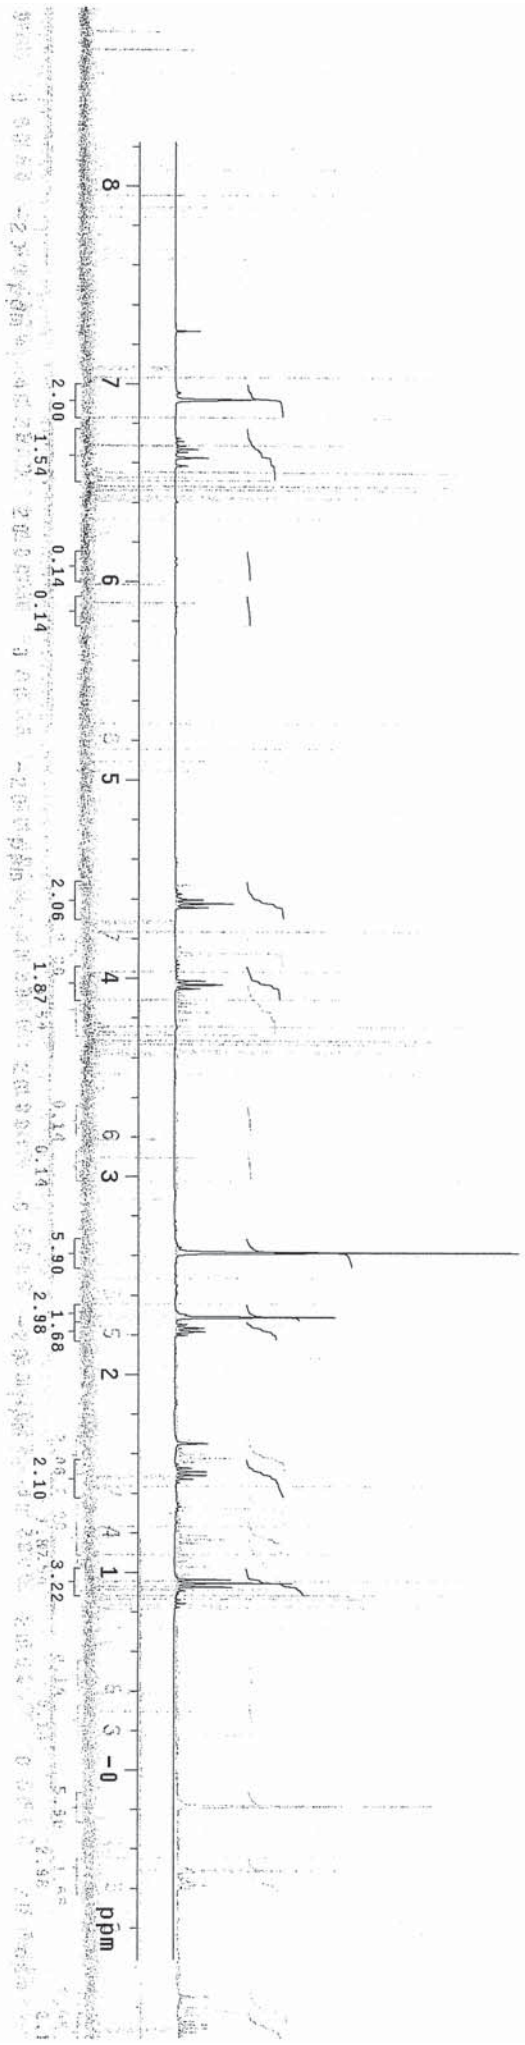



1cq3-170b-13c  
exp25 std13c

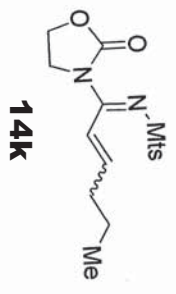

SAMPLE DEC. & VT  
 date Jan 18 2011 dfrq 399.951  
 solvent cdcl3 dn HI  
 file cdcl3 exp 40  
 ACQUISITION dof 0  
 sfrq 100.577 dm YYY  
 tn C13 dmm W  
 at 0.701 dmf 6700  
 np 39216 dseq 90.0  
 sw 27972.0 dres  
 fb not used homo n  
 bs 2 PROCESSING 1.00  
 ss 4 lb write  
 tpwr 58 wfile ft  
 pw 7.0 proc 65536  
 di 1.000 fn  
 tof 525.7 math f  
 nt 100000  
 ct 1400 werr  
 atlock n wexp  
 gain n wds  
 44 wnt

FLAGS  
 i1 n  
 in n  
 dp y  
 hs nn

DISPLAY  
 sp -468.3  
 wp 17546.5  
 vs 3026  
 sc 0  
 wc 250  
 hzmm 70.19  
 is 500.00  
 rfi 11676.1  
 rfp 7749.7  
 th 2  
 ins 100.000  
 al ph

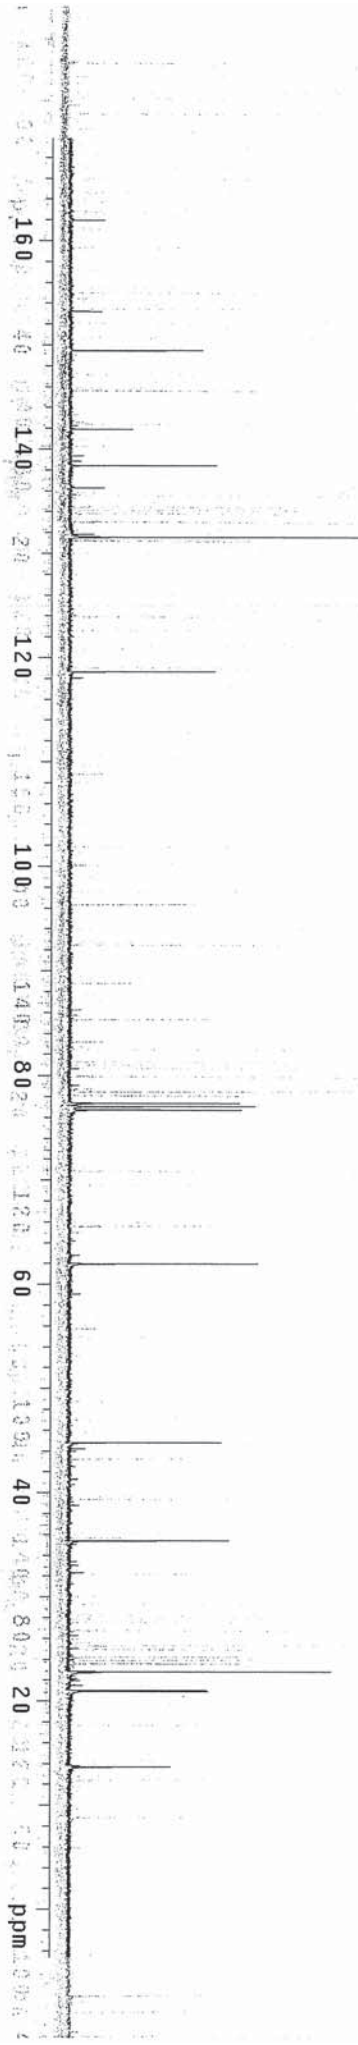

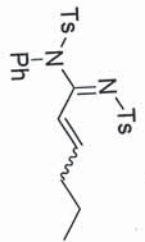

1cq3-65-4  
exp25 szpu1

|             |            |           |         |
|-------------|------------|-----------|---------|
| SAMPLE      | 2 2010     | DEC. & VT | H1      |
| date        | Dec 2 2010 | dn        | -1425.0 |
| solvent     | cdcl3      | dof       | nmn     |
| file        | exp        | dm        | C       |
| ACQUISITION | 399.951    | dmm       | 200     |
| sfrq        | H1         | dmf       |         |
| tn          | 2.500      | lb        | 0.20    |
| at          | 35384      | fn        | 65536   |
| np          | 7196.8     | math      | f       |
| sw          | not used   |           |         |
| fb          | not used   |           |         |
| bs          | Z          | werr      |         |
| pw          | 6.7        | wexp      |         |
| tpwr        | 6.7        | wds       |         |
| tpwr        | 57         | wnt       |         |
| dl          | 4.800      | sp        | -214.1  |
| tof         | -5.9       | wp        | 3572.9  |
| nt          | 10         | vs        | 101     |
| ct          | 10         | sc        | 0       |
| atlock      | n          | wc        | 250     |
| gain        | not used   | h2mm      | 14.29   |
| fl          | FLAGS      | ls        | 312.78  |
| in          | n          | rtf       | 1626.6  |
| dp          | Y          | th        | 0       |
| hs          | nn         | ins       | 2       |
|             |            | at        | 3.000   |
|             |            | ph        |         |

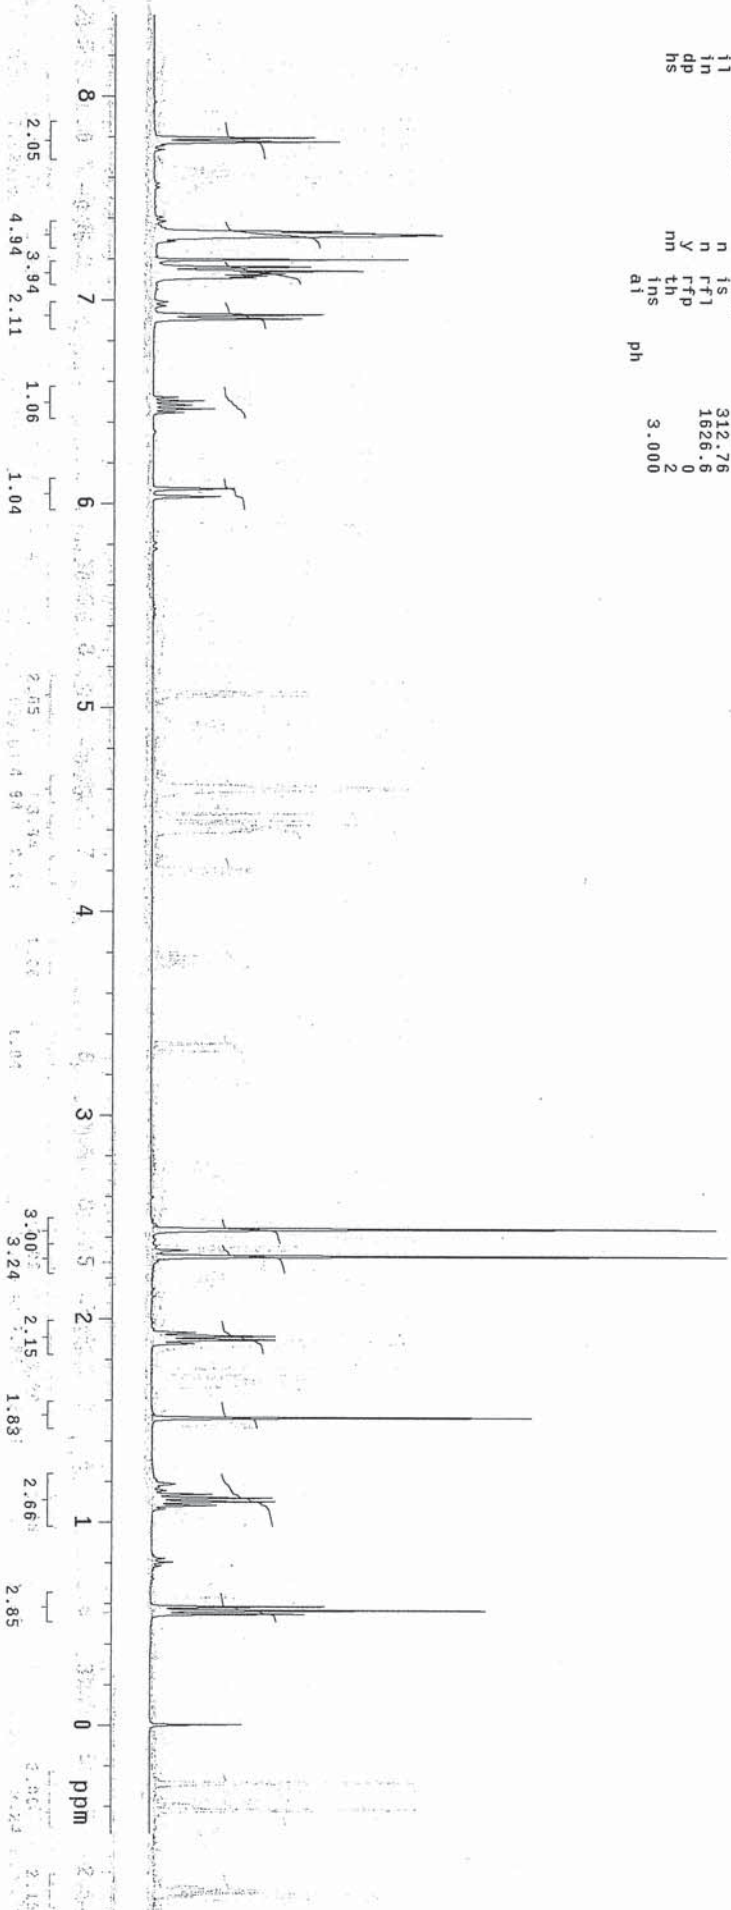

1cq-3-65-4  
 exp1 CARBON

|          |            |             |         |            |          |
|----------|------------|-------------|---------|------------|----------|
| date     | Dec 2 2010 | SAMPLE      | 2       | temp       | not used |
| solvent  | cdc13      | file        | exp     | gain       | 54       |
| file     | exp        | ACQUISITION | 28258.6 | spn        | 20       |
| sw       | 28258.6    | at          | 1.300   | hst        | 0.008    |
| np       | 73498      | fb          | 16000   | pw90       | 9.200    |
| bs       | 16000      | di          | 3.000   | alfa       | 10.000   |
| dl       | 3.000      | nt          | 10000   | flags      | n        |
| nt       | 10000      | ct          | 764     | PROCESSING | nn       |
| ct       | 764        | TRANSMITTER | G13     | lb         | 0.50     |
| tn       | 125.702    | sfrq        | 865.4   | fn         | not used |
| tof      | 865.4      | tpwr        | 56      | sp         | DISPLAY  |
| pw       | 13.500     | DECOUPLER   | H1      | wd         | -403.6   |
| dn       | 0          | dof         | 0       | rfl        | 23570.2  |
| dm       | 0          | dm          | ny      | rfp        | 11035.0  |
| decouple | ny         | dm          | 1p      | tp         | 9707.0   |
| dpmv     | 36         | decouple    | ny      | tp         | -943.7   |
| dmf      | 11101      | dmf         | 36      | WC         | 250      |
|          |            |             |         | SC         | 0        |
|          |            |             |         | VS         | 3341     |
|          |            |             |         | TH         | 0        |
|          |            |             |         | AI         | cdc ph   |
|          |            |             |         |            | 4        |

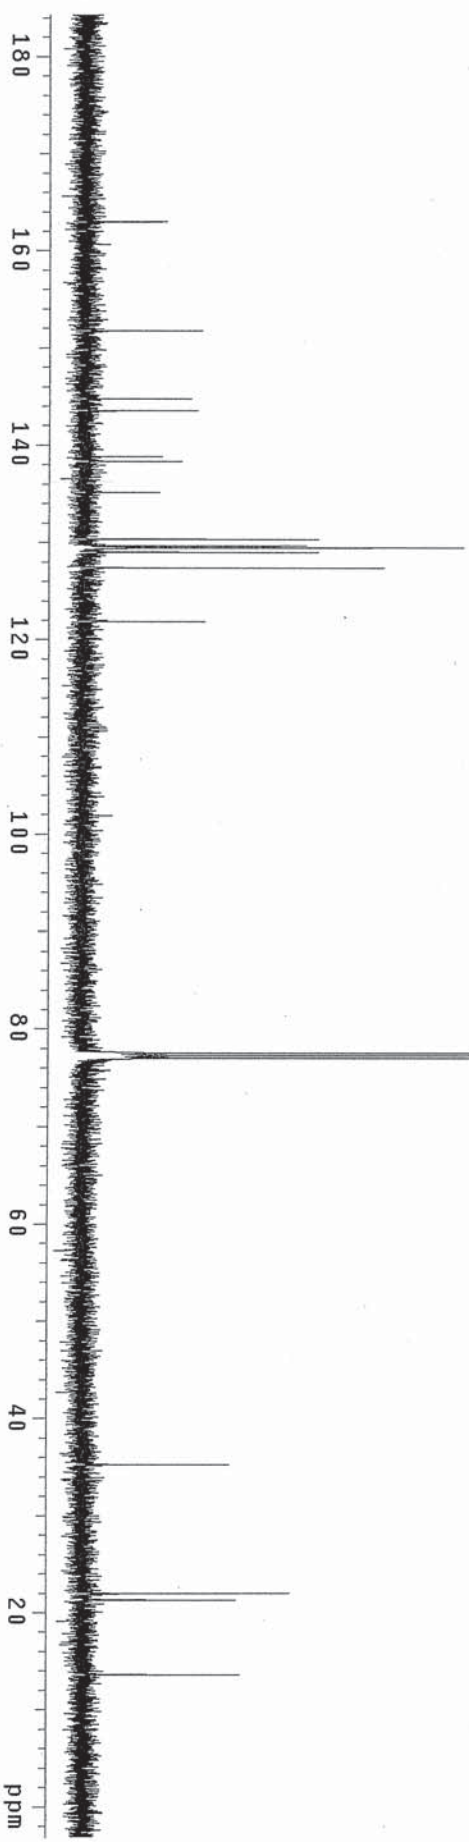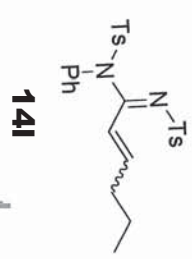

Supplement: NIHMS277674-supplement-1_si_001.pdf [file NIHMS277674-supplement-1_si_001.pdf]
